# Supplementary material for: Multi-region sampling with paired sample sequencing analyses reveals sub-groups of patients with novel patient-specific dysregulation in Hepatocellular Carcinoma
Source: Springer Nature journal article supplement (doi:10.1186/s12885-022-10444-3), 2023-02-03

upregulated genes; original(black line) & shuffled(colored) N-T pairing

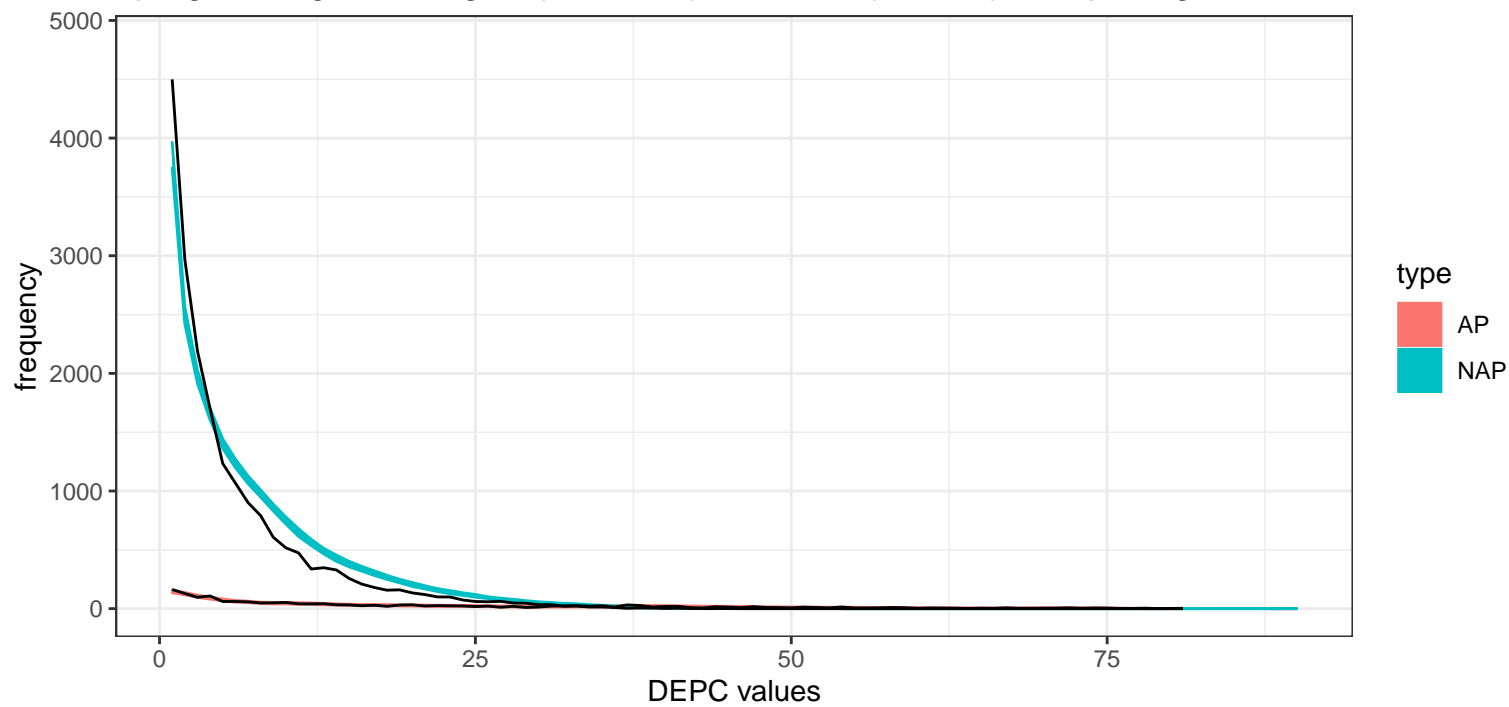

downregulated genes; original(black line) & shuffled(colored) N-T pairing

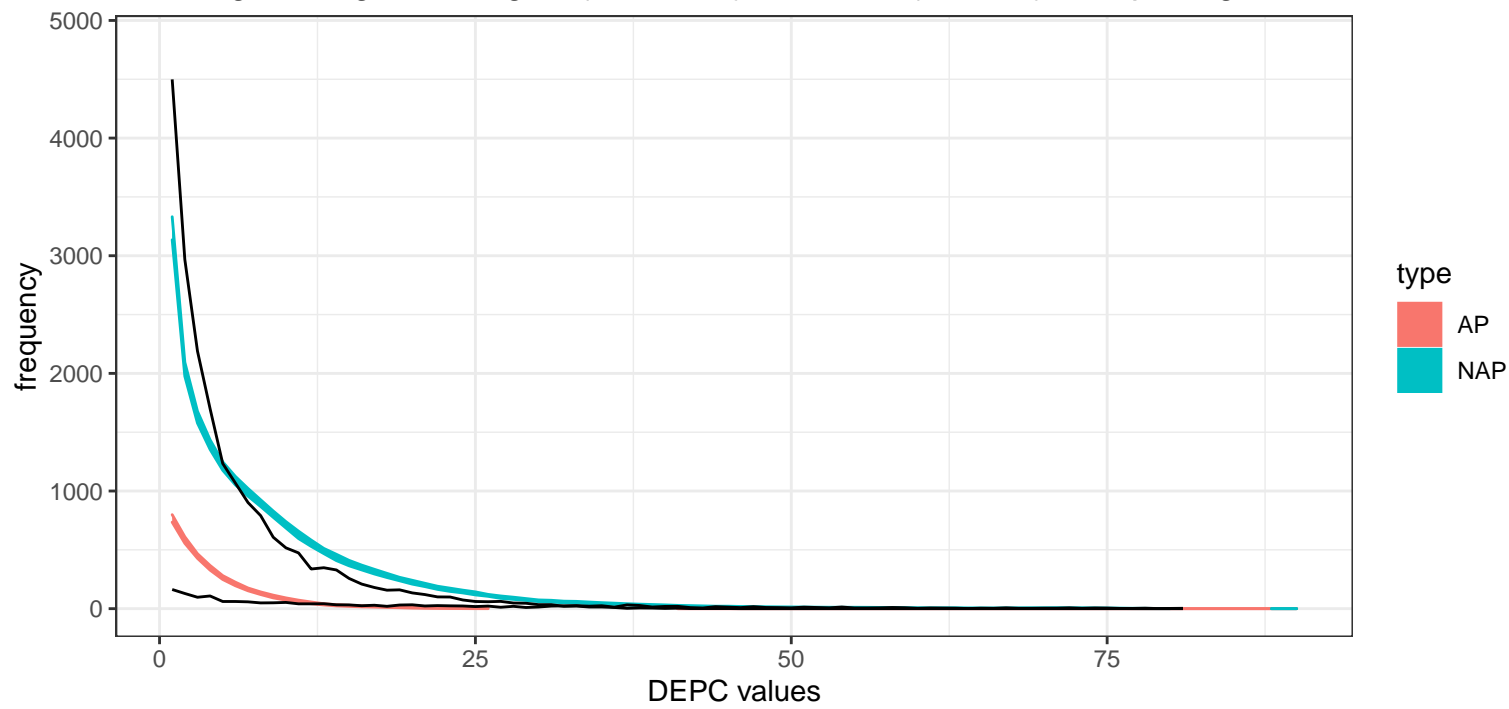

Supplement: MOESM9 [file 23989548]
