# Supplementary material for: Multi-region sampling with paired sample sequencing analyses reveals sub-groups of patients with novel patient-specific dysregulation in Hepatocellular Carcinoma
Source: Springer Nature journal article supplement (doi:10.1186/s12885-022-10444-3), 2023-02-03

A

**Blockclustering results**

| Patient   | Class |
|-----------|-------|
| Patient X | PG1   |
| Patient Y | PG0   |

**Training + Testing**

|           |              | Gene A | Gene B | Class |
|-----------|--------------|--------|--------|-------|
| Patient X | Sample A TND | 6      | -1     | 1     |
|           | Sample B TND | 2      | -1     | 1     |
| Patient Y | Sample A TND | 3      | 3      | 0     |
|           | Sample B TND | 8      | 6      | 0     |

- Multi-region sampling
- Tumour-Normal Difference (TND)

Trains and tests classification model with patient cluster as class

|               | Gene A | Gene B |
|---------------|--------|--------|
| Patient M TND | 6      | -1     |
| Patient N TND | 3      | 2      |

**TCGA paired sample data**

Treated as new data

**Classification MLP Model**

Predict if patient belongs to the cluster that is more likely to recur

| Patient   | Class |
|-----------|-------|
| Patient M | PG1   |
| Patient N | PG0   |

B

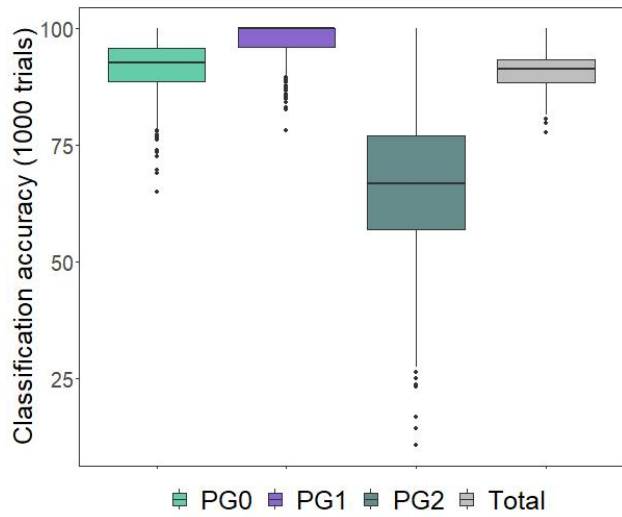

Supplement: MOESM12 [file 23989548]
