# Supplementary material for: Multi-region sampling with paired sample sequencing analyses reveals sub-groups of patients with novel patient-specific dysregulation in Hepatocellular Carcinoma
Source: BMC Cancer. 2023 Feb 3;23:118. doi: 10.1186/s12885-022-10444-3 (PMC9896715; doi:10.1186/s12885-022-10444-3)
Supplement: Supplementary file 2 — Additional file 2: Supplementary Table S2. List of up-regulated genes in the tumour samples compared to the adjacent normal samples from all-patients analysis. Supplementary Table S3. List of down-regulated genes in the tumour samples compared to the adjacent normal samples from all-patients analysis. [file 12885_2022_10444_MOESM2_ESM.xlsx]

## Sheet: S2
Supplementary Table S2. List of up-regulated genes in the tumour samples compared to the adjacent normal samples from all-patients analysis
Ensembl ID	log2FoldChange	padj
ENSG00000286448.1	5.93154	1.24418e-61
ENSG00000186827.11	1.52534	1.24232e-35
ENSG00000225905.1	1.01933	0.0178994
ENSG00000233542.2	3.71224	2.22645e-22
ENSG00000187730.9	3.18603	1.03925e-98
ENSG00000197921.6	1.39214	4.04975e-06
ENSG00000287828.1	2.19943	1.68698e-05
ENSG00000078900.15	2.61857	8.29939e-69
ENSG00000227589.1	1.19863	1.71977e-06
ENSG00000069812.11	1.83701	1.6612e-09
ENSG00000142583.18	1.91299	1.00964e-27
ENSG00000162444.12	1.22779	6.17122e-32
ENSG00000243073.4	1.82311	0.00321783
ENSG00000142621.19	1.48874	2.5344e-24
ENSG00000233485.1	2.67424	5.7497e-05
ENSG00000224459.1	1.41752	0.00624125
ENSG00000183888.4	1.65775	0.00515098
ENSG00000117148.8	4.98403	1.96624e-07
ENSG00000287192.1	1.20101	0.00943345
ENSG00000179546.4	3.84005	3.12865e-20
ENSG00000007968.7	2.83309	1.38153e-119
ENSG00000127423.10	3.46046	1.80473e-80
ENSG00000117632.23	1.92663	1.62109e-211
ENSG00000176092.15	2.76951	7.6056e-112
ENSG00000175793.12	3.68951	4.29929e-120
ENSG00000260386.6	2.81465	1.31602e-13
ENSG00000284543.1	1.93047	1.86074e-30
ENSG00000134668.12	1.35116	6.83454e-13
ENSG00000160050.14	1.20722	2.08568e-34
ENSG00000233775.1	1.50764	0.00550223
ENSG00000162522.11	1.31464	1.03387e-78
ENSG00000233246.1	1.29806	0.000908222
ENSG00000121904.17	1.94814	9.93782e-26
ENSG00000092853.14	2.67212	1.39014e-138
ENSG00000232335.1	2.67955	0.00317015
ENSG00000134690.11	3.16944	1.3192e-263
ENSG00000183682.8	1.19223	5.34245e-12
ENSG00000261798.1	2.35905	0.00137969
ENSG00000187801.15	1.27722	2.25263e-52
ENSG00000260920.2	1.40292	3.47181e-74
ENSG00000279667.1	1.27348	4.78438e-06
ENSG00000228940.1	4.86186	4.18264e-21
ENSG00000164007.11	1.35631	4.14543e-08
ENSG00000186973.11	1.14222	1.10709e-05
ENSG00000117399.14	3.64457	5.02227e-245
ENSG00000196517.12	1.243	1.95454e-22
ENSG00000230615.7	1.20231	6.06973e-09
ENSG00000142945.13	3.25209	8.15397e-250
ENSG00000162415.7	1.24688	3.59945e-22
ENSG00000280670.3	1.69452	9.64172e-94
ENSG00000227857.2	2.63991	1.05056e-18
ENSG00000085999.13	3.0366	1.72325e-152
ENSG00000186118.9	1.37141	0.000284443
ENSG00000225506.2	2.41959	1.43805e-31
ENSG00000123473.15	2.27016	8.31789e-190
ENSG00000225762.1	1.29131	2.23193e-12
ENSG00000237424.1	1.51072	1.66979e-51
ENSG00000186564.5	1.40987	5.20908e-33
ENSG00000123080.12	1.61465	3.81501e-108
ENSG00000085831.15	2.09973	3.1638e-53
ENSG00000261664.5	1.92216	3.96339e-12
ENSG00000169213.7	2.68615	1.38187e-61
ENSG00000085840.13	2.32655	3.512e-132
ENSG00000203985.11	3.45077	2.6118e-41
ENSG00000162399.9	2.06881	1.25409e-05
ENSG00000272226.1	1.8449	0.00224942
ENSG00000237352.4	1.045	4.08086e-13
ENSG00000226476.6	3.58489	1.94911e-31
ENSG00000231252.3	1.65625	7.85496e-08
ENSG00000142856.16	1.04913	3.87961e-79
ENSG00000116675.16	2.30507	1.65014e-83
ENSG00000116745.7	2.47981	0.00781374
ENSG00000024526.17	3.96907	2.66989e-222
ENSG00000234264.1	3.57089	9.11328e-05
ENSG00000285407.1	4.72869	2.39364e-20
ENSG00000287453.1	6.01723	1.53657e-09
ENSG00000137968.16	1.67449	8.87054e-17
ENSG00000230863.3	3.85344	6.61853e-23
ENSG00000057468.7	1.17237	4.26224e-09
ENSG00000117069.15	1.00963	0.000315003
ENSG00000171502.15	1.91661	1.43124e-27
ENSG00000279778.1	2.0474	1.65305e-29
ENSG00000097046.13	1.20606	7.41052e-47
ENSG00000172031.7	2.35146	5.24038e-22
ENSG00000226835.3	1.25716	0.00220859
ENSG00000236098.1	1.23907	1.67623e-06
ENSG00000228971.3	2.41479	1.70393e-08
ENSG00000117600.12	2.95464	1.0333e-41
ENSG00000156876.10	1.09196	1.49534e-74
ENSG00000060718.22	1.09931	6.81498e-05
ENSG00000215869.4	2.82286	9.13109e-25
ENSG00000121957.14	3.14634	1.43382e-233
ENSG00000116299.17	1.0009	9.81123e-14
ENSG00000134222.16	1.06114	6.46308e-31
ENSG00000221986.7	1.30208	0.00737482
ENSG00000134243.12	1.25305	1.50741e-49
ENSG00000198758.10	4.19233	3.70958e-129
ENSG00000156150.9	5.42077	0.000430943
ENSG00000273010.1	1.03297	2.9267e-10
ENSG00000197852.12	1.00198	1.10831e-40
ENSG00000227811.3	2.11684	4.9679e-23
ENSG00000284830.1	1.05175	0.000251541
ENSG00000287217.1	2.11906	2.7698e-08
ENSG00000233154.6	1.64756	8.33004e-17
ENSG00000143061.17	2.22328	2.66152e-75
ENSG00000116830.12	1.03708	4.76604e-93
ENSG00000134253.10	1.29522	3.67776e-49
ENSG00000188610.12	1.88957	1.4536e-80
ENSG00000277702.1	2.84428	3.15782e-10
ENSG00000263513.5	2.88291	1.01164e-71
ENSG00000270872.2	1.38208	2.83223e-27
ENSG00000232527.8	1.94584	7.85432e-13
ENSG00000215784.6	2.24232	5.74811e-81
ENSG00000211451.12	1.50958	5.38427e-49
ENSG00000287190.1	1.226	6.62554e-10
ENSG00000233396.8	1.69017	3.14097e-70
ENSG00000276509.1	1.18522	1.72423e-07
ENSG00000180867.11	1.02132	6.17067e-67
ENSG00000278811.4	1.31145	5.08715e-09
ENSG00000116128.11	1.29013	1.83745e-91
ENSG00000227733.10	2.35152	1.2602e-27
ENSG00000274020.4	1.30542	3.03046e-46
ENSG00000224481.3	2.06513	0.0129608
ENSG00000233030.2	2.35621	3.46834e-23
ENSG00000183598.3	1.4484	0.000707826
ENSG00000270882.2	1.27575	3.12097e-17
ENSG00000220323.4	1.50348	1.85376e-83
ENSG00000261716.2	1.24349	3.25316e-56
ENSG00000270276.2	1.2095	0.0166258
ENSG00000228126.1	1.453	1.28616e-15
ENSG00000143390.17	1.26875	5.89844e-164
ENSG00000232536.1	1.08953	0.000643484
ENSG00000249602.1	1.44737	1.24391e-21
ENSG00000268288.1	1.25044	1.42316e-10
ENSG00000182134.16	1.5578	9.67835e-154
ENSG00000203288.4	1.64798	5.51265e-50
ENSG00000269489.1	1.36434	2.31632e-07
ENSG00000234614.1	1.72178	1.63943e-88
ENSG00000188015.10	1.22854	4.94701e-10
ENSG00000143570.18	1.1263	4.51976e-35
ENSG00000143595.13	2.92157	1.01504e-05
ENSG00000287064.1	2.17593	1.96091e-20
ENSG00000143603.19	1.05615	2.01903e-20
ENSG00000232093.1	1.07819	2.58809e-30
ENSG00000243364.8	1.03215	7.96073e-51
ENSG00000143590.14	1.79475	3.62199e-63
ENSG00000236263.1	1.65419	2.4913e-12
ENSG00000160766.14	1.14611	4.25734e-36
ENSG00000177628.16	1.24733	3.11751e-106
ENSG00000160767.21	1.33821	1.31463e-117
ENSG00000232519.2	1.83709	4.76183e-06
ENSG00000287839.1	1.85446	3.60285e-104
ENSG00000254726.3	1.60496	7.59651e-60
ENSG00000163467.11	1.29605	2.41954e-39
ENSG00000125462.18	1.87922	8.98649e-57
ENSG00000183856.11	3.39936	1.72817e-254
ENSG00000272068.1	3.4015	1.1631e-68
ENSG00000132692.19	1.22054	0.00115627
ENSG00000272405.1	3.89316	1.28192e-160
ENSG00000229953.1	3.99755	1.10687e-119
ENSG00000027644.5	1.66891	0.000209979
ENSG00000231666.7	3.27379	2.83916e-22
ENSG00000143318.13	1.21531	1.09418e-06
ENSG00000158882.15	1.52181	1.02787e-119
ENSG00000162745.10	2.39786	1.25897e-80
ENSG00000143228.13	3.46527	1.59063e-281
ENSG00000224358.1	1.3498	1.53709e-27
ENSG00000143179.16	1.36058	1.95751e-128
ENSG00000229588.2	1.675	0.0257791
ENSG00000234142.2	2.09704	6.86203e-23
ENSG00000143195.13	1.1887	1.42033e-13
ENSG00000232194.1	1.56159	0.00419662
ENSG00000233985.2	4.14957	3.22984e-37
ENSG00000116132.12	1.42958	3.70591e-20
ENSG00000231424.3	1.34879	4.77219e-17
ENSG00000225243.5	1.88509	1.23534e-08
ENSG00000197959.14	1.17446	3.23615e-29
ENSG00000094975.14	1.01981	4.93763e-76
ENSG00000117586.11	1.01265	6.28428e-34
ENSG00000285777.1	1.33164	0.0154298
ENSG00000183831.7	1.4934	4.51366e-11
ENSG00000120334.15	1.88576	7.84118e-168
ENSG00000236021.2	1.48531	1.69939e-24
ENSG00000224687.2	1.01893	6.91905e-23
ENSG00000162782.16	1.84358	0.000106952
ENSG00000121454.6	2.57241	4.19769e-34
ENSG00000243155.1	1.46536	2.51884e-27
ENSG00000232586.1	1.25711	1.74975e-26
ENSG00000198216.12	1.85378	1.45573e-08
ENSG00000135862.6	1.15828	8.67703e-72
ENSG00000230426.4	2.42029	1.34732e-14
ENSG00000285894.2	3.06084	4.15625e-24
ENSG00000162670.11	3.53113	0.00419499
ENSG00000285280.2	2.25402	1.429e-58
ENSG00000285986.1	1.69294	4.49959e-06
ENSG00000066279.18	3.26041	3.32786e-273
ENSG00000235748.1	2.65975	1.47e-06
ENSG00000118193.12	2.91931	2.88324e-178
ENSG00000260088.1	1.17292	2.75893e-06
ENSG00000081248.11	1.26243	0.0110839
ENSG00000234678.2	1.24785	5.27715e-43
ENSG00000170075.9	1.49763	1.44756e-15
ENSG00000077152.11	2.915	9.26226e-285
ENSG00000234996.4	1.80963	5.31465e-36
ENSG00000233791.5	1.70796	2.84356e-17
ENSG00000280924.1	2.6302	2.71229e-20
ENSG00000226330.1	3.80892	1.24282e-32
ENSG00000196550.10	1.44154	1.53639e-49
ENSG00000174059.17	1.52152	6.14804e-55
ENSG00000287033.1	1.60986	0.00234538
ENSG00000236809.2	2.25202	6.58671e-38
ENSG00000228792.3	1.88279	8.55326e-05
ENSG00000117650.13	4.29158	7.11484e-299
ENSG00000231057.4	3.02505	0.00608313
ENSG00000229258.6	1.33071	0.000119056
ENSG00000143476.18	3.19884	4.56855e-243
ENSG00000065600.12	1.1649	1.10563e-76
ENSG00000198468.9	1.44355	8.93789e-75
ENSG00000162769.13	1.45695	1.77559e-117
ENSG00000143494.15	2.86706	2.67102e-72
ENSG00000117724.13	3.67766	0
ENSG00000143512.13	1.89846	1.26138e-21
ENSG00000188460.4	1.12242	7.75933e-07
ENSG00000236773.1	1.06056	3.38362e-05
ENSG00000154380.17	1.53752	2.32701e-135
ENSG00000227496.3	1.08209	4.3768e-15
ENSG00000225518.3	1.49089	3.80999e-27
ENSG00000183814.15	1.29222	7.28942e-71
ENSG00000154342.6	4.61839	0.00893214
ENSG00000224566.2	4.9618	7.89755e-38
ENSG00000287895.1	6.44526	8.88652e-44
ENSG00000280157.1	1.35815	2.77265e-15
ENSG00000196890.4	1.10961	0.000171672
ENSG00000279306.1	2.13551	0.00295479
ENSG00000183929.7	2.82271	2.71244e-10
ENSG00000206878.1	3.15874	0.00899009
ENSG00000225656.1	3.92738	2.69484e-25
ENSG00000223393.2	1.46064	8.29452e-14
ENSG00000233461.6	1.0184	8.75424e-38
ENSG00000287633.1	1.59286	1.90537e-05
ENSG00000237520.1	2.42075	1.11013e-19
ENSG00000168243.11	3.14092	1.06251e-34
ENSG00000223776.5	1.42115	3.67381e-17
ENSG00000234464.2	5.88928	2.24397e-09
ENSG00000215808.4	2.03263	1.79498e-15
ENSG00000231877.1	6.89389	0.0233228
ENSG00000203668.2	1.11201	2.04679e-38
ENSG00000174371.17	3.52769	4.55546e-177
ENSG00000279774.1	2.54724	0.000868885
ENSG00000235021.1	1.4675	0.000323133
ENSG00000197472.15	4.63922	3.12422e-15
ENSG00000286747.1	1.96692	4.30487e-08
ENSG00000286015.1	4.81494	2.54922e-64
ENSG00000233296.2	1.3279	0.0149913
ENSG00000176887.7	3.33893	2.15566e-09
ENSG00000171848.15	2.93611	1.74226e-209
ENSG00000271952.2	2.00162	0.0105322
ENSG00000230790.2	2.28784	7.51968e-07
ENSG00000225649.6	1.32179	5.31092e-12
ENSG00000134323.12	1.80433	1.48584e-17
ENSG00000236348.1	3.24699	0.000925435
ENSG00000132031.13	2.08044	1.97214e-20
ENSG00000223634.1	1.24559	0.000196541
ENSG00000115129.14	1.58272	1.84476e-85
ENSG00000138092.11	1.00129	4.69505e-44
ENSG00000157856.12	1.17773	2.67728e-12
ENSG00000115163.15	3.52012	7.26824e-179
ENSG00000138028.16	1.35604	1.0271e-24
ENSG00000163792.6	1.23511	1.11084e-06
ENSG00000115194.11	2.00989	2.4426e-13
ENSG00000138100.13	2.19775	1.72789e-15
ENSG00000229951.5	1.23007	3.29877e-05
ENSG00000272716.1	1.07432	3.00041e-15
ENSG00000259439.2	5.57745	3.30756e-07
ENSG00000170577.8	3.90179	1.53552e-11
ENSG00000286519.1	1.51455	1.25585e-07
ENSG00000236824.2	1.1068	2.7038e-10
ENSG00000095002.15	1.39337	2.41976e-138
ENSG00000230773.9	1.1681	2.31088e-22
ENSG00000214595.12	1.10792	3.25467e-31
ENSG00000226702.1	4.11328	4.06117e-28
ENSG00000162929.14	1.31315	7.41402e-93
ENSG00000115507.10	3.30484	6.42216e-68
ENSG00000116035.4	1.00469	0.000818408
ENSG00000135638.14	1.93561	5.15936e-16
ENSG00000163017.14	1.04971	4.42761e-11
ENSG00000144045.14	1.3572	3.57993e-08
ENSG00000231172.2	3.57422	2.8065e-07
ENSG00000227088.2	7.64862	0.0208239
ENSG00000214429.3	7.15877	1.05206e-17
ENSG00000115386.6	2.39506	7.26462e-16
ENSG00000066032.18	1.61671	1.37521e-10
ENSG00000249884.8	1.7881	0.000282691
ENSG00000280721.1	1.41124	1.10339e-22
ENSG00000232508.1	9.17257	1.98325e-20
ENSG00000261522.5	1.5917	0.0155907
ENSG00000121152.10	2.75046	1.32827e-219
ENSG00000228970.6	2.60625	2.03968e-26
ENSG00000185674.9	4.52472	1.96452e-11
ENSG00000230393.1	1.67952	1.4066e-11
ENSG00000175874.10	4.59579	5.46634e-38
ENSG00000196460.14	1.47165	1.85732e-21
ENSG00000237880.2	5.84023	6.63762e-11
ENSG00000286769.1	7.08741	1.38183e-12
ENSG00000198203.10	2.23208	3.19823e-41
ENSG00000237223.6	1.8144	1.36714e-12
ENSG00000271284.1	6.07215	2.01321e-07
ENSG00000169679.15	3.43355	2.54203e-277
ENSG00000227992.1	1.05159	2.24992e-17
ENSG00000271590.1	1.20223	6.6838e-10
ENSG00000285016.1	1.16819	0.000732097
ENSG00000240350.3	1.26433	5.30446e-07
ENSG00000236307.2	1.19732	1.13585e-13
ENSG00000278962.1	1.09421	6.45503e-23
ENSG00000169607.13	3.66006	4.87466e-244
ENSG00000125571.9	3.90048	0.0017239
ENSG00000231013.2	1.13837	1.56681e-10
ENSG00000280409.1	2.49624	0.000874162
ENSG00000188219.14	1.21497	0.034706
ENSG00000287071.1	1.20661	0.000196949
ENSG00000150551.11	2.3718	2.2982e-50
ENSG00000076003.5	1.38959	1.67198e-96
ENSG00000229131.1	6.37553	5.26708e-08
ENSG00000226674.11	1.23221	3.4882e-16
ENSG00000183091.19	1.71537	1.79619e-38
ENSG00000182389.19	1.04715	3.27762e-13
ENSG00000230991.2	5.74416	7.06883e-12
ENSG00000078098.14	1.02633	4.27873e-10
ENSG00000152253.9	3.47652	2.36993e-206
ENSG00000213160.10	1.00495	2.41002e-48
ENSG00000213981.8	1.94209	2.33373e-07
ENSG00000234350.5	1.00233	6.72832e-17
ENSG00000239467.6	1.06691	2.95943e-36
ENSG00000128683.14	1.93655	1.60704e-12
ENSG00000286115.1	2.64249	9.45353e-13
ENSG00000144355.15	2.86991	3.03886e-09
ENSG00000232555.2	3.53421	0.000292961
ENSG00000288048.1	3.30042	0.00143101
ENSG00000091409.15	1.54969	2.54396e-144
ENSG00000228016.1	1.55394	0.00207243
ENSG00000144354.14	1.85232	5.48769e-34
ENSG00000270460.1	3.61565	4.65621e-09
ENSG00000236449.2	5.28667	1.00288e-31
ENSG00000138435.16	1.4623	3.05434e-05
ENSG00000128710.5	3.96463	3.22228e-21
ENSG00000237380.7	1.63977	0.0260363
ENSG00000128709.13	3.65667	4.61408e-49
ENSG00000175879.9	2.02778	8.30679e-30
ENSG00000128652.11	2.90268	8.95374e-30
ENSG00000207744.1	3.89565	4.60656e-08
ENSG00000170166.6	3.53793	5.47461e-44
ENSG00000224189.8	4.02488	8.1086e-77
ENSG00000226363.3	4.14654	2.90721e-09
ENSG00000128645.15	3.96239	5.37186e-26
ENSG00000224577.3	1.6702	4.26958e-08
ENSG00000163364.10	1.63853	1.83669e-17
ENSG00000227098.2	2.78921	0.0241186
ENSG00000236501.6	3.28114	4.12464e-35
ENSG00000229941.6	1.8222	0.000664507
ENSG00000286797.1	1.94103	1.97218e-13
ENSG00000222017.1	1.01358	0.0382888
ENSG00000225953.3	1.77817	9.02474e-67
ENSG00000163535.18	2.36789	1.87909e-200
ENSG00000287133.1	1.27021	6.90209e-08
ENSG00000183671.12	2.54821	3.21546e-08
ENSG00000231896.1	2.91789	0.000472071
ENSG00000078018.20	1.0855	4.04336e-26
ENSG00000138376.11	1.08385	3.01533e-57
ENSG00000229267.3	2.1514	4.48162e-34
ENSG00000286836.1	1.55355	8.9721e-05
ENSG00000235770.6	1.0145	3.99715e-12
ENSG00000216721.3	3.27101	3.73105e-08
ENSG00000144583.5	3.10976	4.08693e-18
ENSG00000232485.3	1.34745	3.01422e-39
ENSG00000233143.2	1.21694	0.000360838
ENSG00000264755.1	1.83988	5.5963e-05
ENSG00000243910.8	1.00401	1.54276e-09
ENSG00000230432.1	6.17208	0.0463509
ENSG00000224826.1	4.76905	0.0111155
ENSG00000168955.4	3.76602	1.02082e-20
ENSG00000115009.13	1.65994	3.90351e-24
ENSG00000232023.3	1.10955	2.06408e-05
ENSG00000238062.6	2.64302	2.29127e-10
ENSG00000283491.1	1.19261	6.87034e-13
ENSG00000223198.1	1.60704	1.60554e-05
ENSG00000181798.3	1.14535	1.09014e-16
ENSG00000163295.5	1.67854	0.0358268
ENSG00000224814.1	1.72337	0.000184684
ENSG00000123485.12	3.4526	1.49467e-240
ENSG00000224287.2	1.48601	7.19093e-10
ENSG00000178752.16	1.14857	2.2562e-17
ENSG00000168393.13	1.10093	2.69765e-76
ENSG00000189229.11	4.25338	9.35755e-43
ENSG00000269982.1	1.37394	1.05997e-16
ENSG00000180385.8	1.32483	3.44479e-47
ENSG00000144554.10	1.60533	1.36836e-111
ENSG00000285906.2	1.57147	1.20861e-29
ENSG00000244502.2	1.43977	0.00819708
ENSG00000163517.15	1.44961	1.3631e-96
ENSG00000180438.15	1.70331	5.98018e-05
ENSG00000228874.1	4.95683	0.0228859
ENSG00000230524.8	2.67142	6.78339e-17
ENSG00000274840.4	2.02637	0.000235396
ENSG00000129810.15	2.81333	1.69166e-176
ENSG00000151789.12	1.02589	3.56733e-10
ENSG00000225542.2	6.57784	8.46769e-07
ENSG00000272554.1	2.80523	2.59888e-09
ENSG00000225548.7	6.94599	4.41362e-130
ENSG00000235493.2	5.51159	8.03814e-18
ENSG00000287774.1	2.59031	0.0248433
ENSG00000206557.6	4.53183	2.60731e-56
ENSG00000230067.3	1.50592	1.04099e-10
ENSG00000179934.7	2.21788	5.80735e-19
ENSG00000228168.1	1.84938	5.27513e-28
ENSG00000287415.1	1.2708	0.00020153
ENSG00000160746.13	1.01001	1.38714e-70
ENSG00000283036.3	1.77039	0.000110677
ENSG00000163808.17	2.91294	4.36466e-154
ENSG00000283473.4	1.31651	0.0048575
ENSG00000114646.10	1.94461	9.68049e-37
ENSG00000164045.12	1.74738	1.89353e-74
ENSG00000114268.12	1.07308	6.94983e-23
ENSG00000145040.4	1.72774	0.000266755
ENSG00000225697.13	1.59221	7.71014e-114
ENSG00000008300.17	2.36392	2.85765e-127
ENSG00000228350.1	4.75872	4.44652e-35
ENSG00000271973.1	2.9495	0.000482164
ENSG00000224424.8	1.15511	1.65784e-34
ENSG00000199546.1	1.25632	2.69303e-07
ENSG00000226913.2	1.48248	2.51805e-16
ENSG00000187492.9	1.57	5.46745e-05
ENSG00000183763.9	2.17959	4.55041e-125
ENSG00000243224.1	1.43594	4.65888e-21
ENSG00000280417.1	1.57237	3.61762e-55
ENSG00000187672.13	2.86126	1.11394e-20
ENSG00000174844.14	1.07802	5.06766e-11
ENSG00000242428.6	2.23855	4.70855e-10
ENSG00000241472.7	1.00993	4.48808e-07
ENSG00000241884.2	5.68915	1.21545e-15
ENSG00000240405.7	4.24095	1.42764e-22
ENSG00000169855.20	2.17195	1.01322e-87
ENSG00000240964.3	3.73216	4.63236e-10
ENSG00000286329.1	2.56723	2.6969e-10
ENSG00000242781.2	3.51329	0.00068717
ENSG00000288004.1	5.09956	0.00055373
ENSG00000239572.3	4.82995	0.0116437
ENSG00000179097.5	1.91291	2.57545e-05
ENSG00000285614.1	1.47829	1.80613e-05
ENSG00000183185.9	2.81172	4.8708e-17
ENSG00000230301.6	4.96863	0.0303925
ENSG00000273374.1	1.02059	3.18735e-10
ENSG00000241469.9	4.98667	0.000980313
ENSG00000241634.1	1.3431	2.63692e-08
ENSG00000163507.14	1.86496	4.03914e-108
ENSG00000177494.6	2.51844	8.49382e-23
ENSG00000091972.18	1.21264	1.40437e-24
ENSG00000273394.1	1.0014	2.8692e-05
ENSG00000172020.12	1.62486	3.12314e-07
ENSG00000272662.1	1.17264	1.46903e-06
ENSG00000051341.14	2.84315	3.67137e-162
ENSG00000082684.16	1.20185	1.4908e-27
ENSG00000239523.6	1.47636	2.05727e-47
ENSG00000173702.7	2.28689	7.66757e-36
ENSG00000284624.1	1.09044	0.00790206
ENSG00000189366.9	2.74601	1.0596e-95
ENSG00000073111.14	2.14831	5.37158e-161
ENSG00000271270.7	1.03645	2.81355e-29
ENSG00000170819.5	2.12348	3.6321e-13
ENSG00000154917.11	1.08892	2.87316e-22
ENSG00000261758.1	1.31207	0.000791459
ENSG00000114113.6	1.13182	0.0169303
ENSG00000243620.2	6.53976	1.31611e-40
ENSG00000174963.17	2.94437	5.67774e-27
ENSG00000240216.7	1.14093	3.91145e-08
ENSG00000243885.1	1.79448	3.94476e-37
ENSG00000243944.5	4.95918	4.02229e-76
ENSG00000168779.19	2.776	7.20799e-26
ENSG00000213186.8	1.2751	5.82145e-38
ENSG00000241369.6	6.65003	0.00532849
ENSG00000163536.12	1.26564	4.87331e-48
ENSG00000244227.7	1.46886	3.1946e-18
ENSG00000206120.11	1.53261	2.43132e-05
ENSG00000242268.3	2.3494	7.09648e-10
ENSG00000287899.1	1.29494	0.00698982
ENSG00000114346.13	2.55857	3.54588e-163
ENSG00000223715.3	1.00518	3.31199e-05
ENSG00000203645.2	1.5559	0.00193306
ENSG00000228221.6	2.6319	5.87912e-28
ENSG00000228561.2	2.65336	1.31952e-07
ENSG00000237978.6	1.19467	8.2303e-15
ENSG00000181449.4	1.75776	7.50197e-06
ENSG00000176597.12	1.3521	2.37403e-32
ENSG00000163915.7	2.21154	0.0131203
ENSG00000171658.8	4.49697	1.05081e-108
ENSG00000163918.10	1.45735	4.98208e-146
ENSG00000232233.1	1.74076	6.2774e-09
ENSG00000228952.1	1.49447	0.000505734
ENSG00000114279.13	1.15355	2.71089e-17
ENSG00000229155.1	2.00583	4.07743e-21
ENSG00000225742.6	1.08504	0.000140353
ENSG00000244675.2	1.19546	0.0126947
ENSG00000287005.1	1.46581	0.000290135
ENSG00000229178.1	1.58212	1.18445e-16
ENSG00000235897.1	1.21214	8.8431e-22
ENSG00000145107.15	2.32123	1.62885e-06
ENSG00000229912.1	1.3138	1.12582e-07
ENSG00000287286.1	1.89873	0.0224892
ENSG00000013810.19	1.15973	5.09927e-62
ENSG00000249006.1	1.03882	0.0118652
ENSG00000072832.15	1.04003	1.64857e-10
ENSG00000074211.14	2.75448	1.15477e-14
ENSG00000272620.2	5.0129	2.91196e-70
ENSG00000250634.6	2.47158	2.51915e-19
ENSG00000248698.6	2.49809	3.14518e-06
ENSG00000248360.7	1.37926	1.82554e-20
ENSG00000248138.5	5.24578	1.72197e-34
ENSG00000109805.10	3.52015	4.29846e-266
ENSG00000248238.2	6.3938	9.48147e-54
ENSG00000279379.1	9.57864	1.57745e-29
ENSG00000248515.2	7.4934	3.0558e-94
ENSG00000251410.2	7.30202	1.93708e-05
ENSG00000250038.7	5.50807	1.33259e-05
ENSG00000261761.5	6.61869	2.44588e-47
ENSG00000272862.1	1.4511	0.000139838
ENSG00000250863.2	4.93389	1.52342e-20
ENSG00000251350.2	6.73429	1.11064e-112
ENSG00000170516.17	6.1889	8.65754e-104
ENSG00000272969.1	1.05968	0.00837164
ENSG00000250775.2	5.65239	0.0196262
ENSG00000248998.2	5.93193	5.86627e-06
ENSG00000285711.1	7.64794	2.08263e-125
ENSG00000249413.2	5.8264	6.336e-90
ENSG00000236562.4	1.37641	3.15449e-05
ENSG00000248635.1	2.10165	7.74205e-22
ENSG00000250376.1	1.00832	3.15016e-10
ENSG00000251529.1	2.70045	0.00738007
ENSG00000248763.2	4.08999	7.41284e-07
ENSG00000196472.4	1.01297	6.99838e-09
ENSG00000213759.10	2.57002	3.36633e-41
ENSG00000250612.2	5.27554	1.27428e-30
ENSG00000109205.16	2.62372	2.80392e-24
ENSG00000156136.10	1.0028	1.93038e-60
ENSG00000056291.17	3.42423	2.70039e-15
ENSG00000260265.1	2.34208	0.000233338
ENSG00000169248.13	1.01274	7.05402e-13
ENSG00000286074.1	1.07496	0.00510288
ENSG00000156269.5	7.93274	4.8673e-08
ENSG00000152583.12	1.27637	7.10836e-29
ENSG00000249001.5	3.64493	2.90804e-27
ENSG00000029559.7	6.26861	5.35516e-25
ENSG00000152595.16	6.82384	3.2368e-05
ENSG00000183199.6	1.05762	2.07944e-24
ENSG00000286618.1	4.11856	0.0136175
ENSG00000118785.14	1.60774	4.50636e-19
ENSG00000138778.13	2.89605	2.43814e-225
ENSG00000245384.2	1.10817	0.0023794
ENSG00000155011.9	1.14172	1.38157e-08
ENSG00000138795.10	1.55175	6.31829e-31
ENSG00000232021.7	1.85002	1.47134e-09
ENSG00000138798.13	1.93137	9.41003e-06
ENSG00000174607.11	1.33281	3.52887e-07
ENSG00000174599.5	1.76502	1.53578e-18
ENSG00000164109.14	2.12912	5.80357e-137
ENSG00000145386.10	3.00427	3.01575e-224
ENSG00000227145.2	1.29222	0.000744267
ENSG00000142731.11	1.79994	1.43318e-101
ENSG00000246876.7	5.74328	3.34369e-30
ENSG00000250102.6	7.2483	3.32866e-38
ENSG00000251598.2	2.68233	1.67168e-30
ENSG00000249463.1	2.65139	7.37375e-07
ENSG00000251388.1	4.52362	0.0247528
ENSG00000251199.6	5.76855	9.97002e-55
ENSG00000254535.4	1.57793	7.19857e-42
ENSG00000248191.1	10.2743	6.36829e-12
ENSG00000151012.13	2.52542	3.98739e-45
ENSG00000248795.1	2.13048	0.00246952
ENSG00000261268.1	1.33128	0.00464205
ENSG00000251333.3	1.1186	1.82476e-05
ENSG00000121211.8	2.41446	6.84878e-118
ENSG00000286133.2	2.8708	4.88929e-21
ENSG00000205208.5	1.02515	6.54778e-72
ENSG00000248431.2	4.81646	2.78073e-07
ENSG00000287424.1	6.51629	0.00587543
ENSG00000250596.2	2.27893	0.0347235
ENSG00000145451.13	2.22221	0.0461953
ENSG00000109674.4	4.12236	3.43153e-145
ENSG00000287349.1	1.56774	0.0155624
ENSG00000287433.1	1.11915	0.000356387
ENSG00000254233.1	2.91697	1.42181e-34
ENSG00000151725.12	2.00908	1.97807e-131
ENSG00000250829.2	4.04557	0.000759193
ENSG00000250590.6	5.60773	6.95327e-06
ENSG00000249378.6	2.69652	1.52685e-05
ENSG00000071539.14	2.82434	4.33379e-176
ENSG00000164362.21	5.92489	2.11198e-101
ENSG00000142319.18	2.523	0.0302321
ENSG00000250579.2	1.84181	5.60781e-07
ENSG00000250060.2	6.01569	3.19375e-09
ENSG00000249159.6	1.08361	2.58268e-07
ENSG00000248783.1	5.20613	2.70813e-14
ENSG00000248131.6	5.81897	7.70246e-43
ENSG00000248693.1	1.16744	8.36169e-09
ENSG00000251629.7	6.66715	4.94281e-91
ENSG00000164256.10	3.02294	5.15423e-13
ENSG00000251273.4	4.69013	4.52257e-19
ENSG00000245662.4	3.63414	3.80499e-08
ENSG00000285042.1	2.61133	0.0296087
ENSG00000113100.10	5.59477	0.0304448
ENSG00000250453.2	4.66285	1.4968e-11
ENSG00000259786.7	1.21236	0.00178704
ENSG00000286543.1	1.55881	0.00772466
ENSG00000079215.14	1.04931	3.8416e-26
ENSG00000286271.2	1.57184	1.70446e-24
ENSG00000249092.1	1.16077	0.0282706
ENSG00000172244.9	2.14621	1.05865e-153
ENSG00000164171.11	1.542	3.48974e-34
ENSG00000249069.8	1.99725	6.72296e-05
ENSG00000232517.2	1.28955	9.45575e-07
ENSG00000164283.13	4.0716	3.67171e-205
ENSG00000164287.12	1.89047	2.26056e-05
ENSG00000164509.15	1.4299	1.77255e-05
ENSG00000249236.2	2.50774	7.33697e-16
ENSG00000227908.3	1.3158	2.86455e-21
ENSG00000035499.13	2.40906	3.2997e-106
ENSG00000250081.1	2.45392	2.0275e-14
ENSG00000123219.13	2.28423	3.59802e-121
ENSG00000251206.1	2.26866	0.0047012
ENSG00000249894.1	3.40312	1.23691e-05
ENSG00000134057.15	3.00444	4.17478e-268
ENSG00000280187.1	1.19171	1.28414e-47
ENSG00000153044.10	1.67437	1.87711e-115
ENSG00000249856.1	1.01225	2.11008e-06
ENSG00000250348.1	2.83982	6.00976e-27
ENSG00000113296.14	3.77963	4.34285e-100
ENSG00000251450.2	1.22385	2.44961e-07
ENSG00000145681.11	2.5708	3.69408e-05
ENSG00000164176.13	1.45224	3.89769e-23
ENSG00000250320.6	1.94128	5.7243e-17
ENSG00000250874.1	5.86755	6.66275e-20
ENSG00000280009.1	2.99533	0.000180722
ENSG00000248323.7	1.01517	1.727e-09
ENSG00000250049.7	4.92628	5.95808e-89
ENSG00000251361.1	1.94738	0.00486028
ENSG00000205359.10	5.91345	1.09761e-13
ENSG00000250682.6	5.78516	9.19465e-11
ENSG00000251026.2	8.30065	1.19525e-138
ENSG00000251574.8	8.61807	5.92658e-57
ENSG00000278958.1	5.12891	0.000880917
ENSG00000253584.1	6.51906	7.05438e-46
ENSG00000286839.1	2.64188	3.83992e-06
ENSG00000172901.20	1.33593	9.18295e-11
ENSG00000250891.2	1.11682	0.0195695
ENSG00000113083.14	1.35943	4.90353e-23
ENSG00000113368.12	1.07194	3.8411e-48
ENSG00000230561.4	2.51681	3.4711e-12
ENSG00000287390.1	6.96571	4.00683e-67
ENSG00000072682.18	1.19206	3.11215e-61
ENSG00000053108.17	4.53504	3.36179e-106
ENSG00000240250.3	1.43762	7.79887e-05
ENSG00000069011.16	6.82535	4.05291e-50
ENSG00000248211.1	5.43366	0.00466831
ENSG00000249803.6	7.26332	5.05404e-23
ENSG00000250284.3	8.48608	9.33491e-06
ENSG00000152377.14	2.54978	2.11388e-33
ENSG00000112984.12	3.74597	3.47386e-272
ENSG00000158402.20	4.02052	1.59267e-251
ENSG00000132563.16	1.59291	3.56345e-18
ENSG00000281398.4	1.31069	1.62456e-39
ENSG00000204970.9	5.41839	9.32006e-10
ENSG00000197479.7	1.09956	5.43062e-11
ENSG00000204956.5	1.79086	1.1028e-22
ENSG00000254221.2	1.01008	1.24859e-08
ENSG00000164266.10	3.47145	4.62535e-68
ENSG00000178776.5	2.96916	6.89193e-36
ENSG00000248362.1	2.59997	0.00351675
ENSG00000133710.15	2.49504	5.98219e-48
ENSG00000127743.6	1.8423	0.00580484
ENSG00000132915.11	1.20846	0.00793617
ENSG00000155850.8	1.25908	3.68833e-71
ENSG00000011083.9	1.09716	8.85326e-06
ENSG00000086570.12	2.37535	0.0492618
ENSG00000113249.13	1.22074	9.5084e-07
ENSG00000164330.17	1.24407	3.94361e-32
ENSG00000245812.3	1.91235	2.58264e-21
ENSG00000279204.1	2.06811	2.41689e-19
ENSG00000170231.15	4.27892	1.82925e-05
ENSG00000164611.13	2.84808	7.14248e-258
ENSG00000253417.5	7.78641	0.000240657
ENSG00000145864.13	1.11395	0.00968905
ENSG00000072571.20	3.01049	7.14376e-210
ENSG00000040275.17	1.5156	2.93893e-172
ENSG00000234511.10	3.42525	4.14617e-21
ENSG00000253966.1	1.15573	0.00900898
ENSG00000113739.10	2.28491	7.22123e-78
ENSG00000253686.2	1.3568	3.53727e-18
ENSG00000287003.1	1.53019	9.61529e-18
ENSG00000145920.15	4.43606	4.08116e-45
ENSG00000280068.1	2.12572	5.96331e-06
ENSG00000250820.1	3.18473	0.046627
ENSG00000248596.8	1.2176	0.000268486
ENSG00000287579.1	1.60086	3.84663e-07
ENSG00000169258.7	2.81789	3.95638e-116
ENSG00000113763.12	1.41347	4.21035e-07
ENSG00000246334.2	1.2104	1.81147e-05
ENSG00000249849.1	2.49549	9.30056e-05
ENSG00000145911.6	1.60491	3.52665e-24
ENSG00000250509.2	2.5801	1.96624e-07
ENSG00000248103.1	1.35492	0.00119787
ENSG00000271727.2	1.20534	0.0243768
ENSG00000228718.2	1.50451	1.72972e-05
ENSG00000271361.1	1.17087	6.6084e-11
ENSG00000229282.2	1.21707	5.59304e-08
ENSG00000260604.2	1.25173	3.00124e-16
ENSG00000124491.16	1.29697	5.21582e-21
ENSG00000285771.1	1.76876	1.58822e-08
ENSG00000137203.13	1.11408	2.18031e-10
ENSG00000285278.1	1.55518	8.51993e-20
ENSG00000229950.1	1.50609	5.47259e-11
ENSG00000272097.2	1.94317	8.35496e-15
ENSG00000242753.2	1.32468	0.000371425
ENSG00000226673.2	2.6157	7.47512e-17
ENSG00000271888.1	1.22696	2.75432e-15
ENSG00000287626.1	1.46218	1.47367e-06
ENSG00000230873.9	1.85927	3.57316e-17
ENSG00000112183.15	1.56986	6.11616e-36
ENSG00000112186.12	2.17042	7.54513e-168
ENSG00000233358.2	6.33674	1.1466e-25
ENSG00000112312.10	1.25167	7.83238e-71
ENSG00000272810.1	1.20916	4.43269e-11
ENSG00000275714.1	1.34744	2.69057e-07
ENSG00000278637.1	1.71604	9.04534e-11
ENSG00000286522.1	3.01609	3.35782e-35
ENSG00000278463.1	1.4165	0.0207612
ENSG00000287080.1	1.91932	2.98994e-19
ENSG00000274290.2	1.15214	7.37697e-23
ENSG00000277157.1	1.19872	1.45982e-07
ENSG00000282988.2	3.00323	2.457e-40
ENSG00000277224.2	1.71194	3.45292e-21
ENSG00000217275.2	2.06513	4.56972e-23
ENSG00000273802.2	1.25928	6.02258e-20
ENSG00000275713.2	1.58314	1.44932e-12
ENSG00000273983.1	2.65786	1.1897e-15
ENSG00000158406.4	1.80032	2.50803e-59
ENSG00000284607.1	3.44834	0.0470512
ENSG00000272312.1	1.28961	5.25064e-05
ENSG00000272468.1	2.50321	8.17932e-42
ENSG00000124635.8	1.5069	1.83369e-32
ENSG00000196787.3	1.7438	2.00261e-38
ENSG00000276180.1	2.67321	3.58397e-60
ENSG00000274997.1	2.24166	1.43193e-08
ENSG00000216915.2	2.05078	0.00250089
ENSG00000185130.5	3.08061	5.212e-24
ENSG00000196747.4	3.79898	3.19955e-50
ENSG00000278828.1	1.69631	3.49652e-46
ENSG00000276368.1	2.3659	1.17374e-05
ENSG00000273542.1	1.40955	7.50878e-15
ENSG00000275221.1	1.12388	5.63123e-12
ENSG00000276903.1	2.84484	1.1291e-10
ENSG00000184357.4	2.9884	2.02347e-19
ENSG00000197153.4	1.60387	0.036048
ENSG00000274641.1	1.94416	1.65017e-21
ENSG00000176933.5	2.40853	6.3308e-55
ENSG00000270326.1	2.10642	4.17335e-06
ENSG00000246350.1	1.98697	0.00226496
ENSG00000204709.4	1.87667	1.05809e-07
ENSG00000237988.5	1.91731	9.96263e-41
ENSG00000213886.4	1.83734	1.82359e-37
ENSG00000204616.11	1.52131	4.95422e-29
ENSG00000231226.1	2.2142	8.28896e-06
ENSG00000228022.6	1.22373	2.31125e-08
ENSG00000228789.7	1.96668	0.04129
ENSG00000137310.12	2.3526	9.89108e-180
ENSG00000204516.10	1.17813	2.79548e-49
ENSG00000204366.4	1.36484	5.63115e-48
ENSG00000237649.8	3.41091	5.03938e-290
ENSG00000274259.2	1.13525	5.00085e-11
ENSG00000112039.5	1.15898	5.60542e-42
ENSG00000197753.11	1.10866	0.000486461
ENSG00000189325.7	1.68556	0.0171932
ENSG00000225945.1	1.12483	0.000512933
ENSG00000124721.18	1.15239	1.14135e-08
ENSG00000112164.6	2.60724	8.23261e-06
ENSG00000220586.2	1.72168	2.38182e-09
ENSG00000156564.9	1.12588	0.040129
ENSG00000112212.12	1.88312	3.51884e-23
ENSG00000124701.5	1.88194	0.0225948
ENSG00000095970.17	1.3324	3.00508e-23
ENSG00000096088.16	3.0139	4.31582e-28
ENSG00000146215.13	1.14502	1.08721e-26
ENSG00000171462.15	3.42215	8.5575e-16
ENSG00000231881.2	2.4285	0.00812763
ENSG00000137225.13	1.47005	2.92446e-30
ENSG00000262179.3	2.57605	8.59866e-13
ENSG00000112818.10	2.07195	1.57946e-17
ENSG00000031691.7	1.24813	8.70424e-81
ENSG00000112118.20	1.30313	1.69949e-118
ENSG00000137270.11	2.57801	9.05357e-15
ENSG00000227885.3	1.14593	7.91871e-12
ENSG00000137269.15	1.00109	1.86121e-16
ENSG00000236740.6	1.54865	3.75001e-06
ENSG00000137251.16	4.60044	3.38896e-63
ENSG00000146143.19	1.20783	8.7017e-130
ENSG00000112280.16	2.68167	4.45066e-43
ENSG00000237643.2	2.49442	0.00065084
ENSG00000231652.2	1.73431	0.00225274
ENSG00000156535.15	1.76101	4.47943e-52
ENSG00000135312.6	2.12258	0.0156579
ENSG00000286042.1	3.99767	5.30019e-23
ENSG00000112742.10	3.90624	3.36198e-264
ENSG00000135324.6	2.53604	9.55145e-45
ENSG00000231776.5	6.66732	1.44754e-34
ENSG00000118432.12	1.23314	7.49665e-12
ENSG00000234426.3	2.86625	1.89511e-09
ENSG00000220267.1	4.1328	0.00490572
ENSG00000288009.1	1.41979	9.75389e-31
ENSG00000224944.2	4.01197	0.00360836
ENSG00000146263.11	1.37322	8.60837e-83
ENSG00000287616.1	3.55794	1.77472e-05
ENSG00000187772.8	7.09347	2.03103e-17
ENSG00000132429.10	4.41066	0.00257079
ENSG00000112333.11	2.07886	0.0113446
ENSG00000270661.1	1.88271	0.00933576
ENSG00000251258.2	4.52073	2.18726e-19
ENSG00000287097.1	3.78125	1.22809e-65
ENSG00000047936.10	1.45077	1.61253e-11
ENSG00000286540.1	2.50581	5.69258e-48
ENSG00000203760.8	2.0403	1.0128e-156
ENSG00000118513.19	1.23488	6.16096e-19
ENSG00000237596.7	1.69249	3.15719e-20
ENSG00000146410.12	2.51215	6.9023e-137
ENSG00000230533.4	2.03786	1.08314e-22
ENSG00000283265.1	2.57761	1.12957e-07
ENSG00000220412.1	2.31947	0.0406912
ENSG00000285875.1	1.81718	6.57585e-14
ENSG00000234147.1	1.31833	1.29609e-06
ENSG00000222764.1	6.76792	3.3152e-06
ENSG00000236366.3	6.11789	8.92859e-16
ENSG00000236591.1	3.40753	6.12329e-11
ENSG00000164520.11	2.16747	1.41888e-07
ENSG00000218358.2	1.92902	5.2278e-12
ENSG00000120262.10	1.41161	4.65619e-36
ENSG00000287591.1	4.98048	1.90785e-23
ENSG00000230234.1	2.81811	2.25617e-20
ENSG00000223485.4	3.25324	1.22621e-11
ENSG00000225532.1	4.90046	3.97874e-09
ENSG00000261795.1	1.03867	9.72068e-05
ENSG00000287342.1	1.15936	3.73307e-07
ENSG00000225981.1	1.69807	1.1085e-11
ENSG00000106268.15	1.15226	9.11287e-72
ENSG00000155034.19	1.4172	5.50509e-88
ENSG00000207973.1	1.74597	0.0315819
ENSG00000229970.3	4.85166	0.0286746
ENSG00000226690.8	2.32693	9.97489e-05
ENSG00000006747.15	1.11712	1.04305e-09
ENSG00000229618.3	1.57454	0.000388001
ENSG00000229108.2	1.89709	1.72213e-10
ENSG00000171243.8	2.42733	3.60152e-16
ENSG00000279048.1	1.43064	2.96748e-23
ENSG00000004846.16	2.79493	2.09823e-07
ENSG00000164651.16	6.81114	0.000250443
ENSG00000105889.15	1.82066	1.0347e-17
ENSG00000230658.2	1.04543	2.4963e-17
ENSG00000136231.14	2.73514	1.33312e-61
ENSG00000287093.1	3.09693	0.0203625
ENSG00000070882.13	1.11458	1.38396e-44
ENSG00000105997.22	1.11193	1.28847e-11
ENSG00000106006.6	4.37916	0.00549681
ENSG00000122592.8	2.53189	1.58563e-10
ENSG00000078399.19	1.4176	4.48824e-07
ENSG00000253293.5	4.03629	5.38584e-57
ENSG00000005073.6	4.99445	1.69859e-06
ENSG00000253508.1	6.35987	1.15992e-16
ENSG00000106031.9	5.73691	8.29095e-162
ENSG00000243766.8	8.00054	2.5351e-109
ENSG00000106038.13	6.84805	5.99247e-08
ENSG00000223813.3	2.0933	7.54801e-12
ENSG00000227017.1	2.8889	5.26022e-07
ENSG00000154678.18	1.17888	5.21578e-16
ENSG00000226468.2	2.79398	0.0130907
ENSG00000197085.11	6.33176	2.72452e-100
ENSG00000230356.1	5.96974	3.29347e-45
ENSG00000011426.11	3.82798	6.16833e-279
ENSG00000106483.12	1.68991	4.19449e-18
ENSG00000203446.2	2.95786	8.34491e-11
ENSG00000224116.7	1.06356	3.37351e-12
ENSG00000238284.2	6.99914	0.0108659
ENSG00000234183.1	1.28299	1.15613e-06
ENSG00000233539.5	3.63845	9.61798e-52
ENSG00000132436.11	1.17418	5.09044e-72
ENSG00000205628.4	3.45069	1.42483e-28
ENSG00000182111.9	8.48282	1.27576e-26
ENSG00000223558.1	1.18777	0.0428448
ENSG00000232727.2	3.00461	0.000188089
ENSG00000223476.1	1.3502	0.0247773
ENSG00000272843.1	1.28449	1.03254e-06
ENSG00000274070.2	1.18338	8.02991e-54
ENSG00000006606.8	1.46292	1.64107e-07
ENSG00000188372.15	1.24525	6.87757e-27
ENSG00000243144.7	2.57517	6.65225e-18
ENSG00000287672.1	1.96782	4.74786e-18
ENSG00000188175.10	1.18214	0.0126023
ENSG00000004948.15	1.37741	4.06154e-08
ENSG00000127928.13	6.43762	3.38296e-17
ENSG00000242265.5	1.15861	2.52592e-09
ENSG00000158560.14	1.26769	1.97862e-15
ENSG00000231764.10	3.17767	0.00120289
ENSG00000105880.7	4.37034	5.13716e-14
ENSG00000185467.7	1.49909	2.52129e-24
ENSG00000002079.14	1.4062	0.00152798
ENSG00000284523.2	1.19129	8.24426e-15
ENSG00000106290.15	1.08192	2.56166e-125
ENSG00000242798.1	1.15527	8.31156e-19
ENSG00000213420.8	1.37122	1.02355e-17
ENSG00000264425.1	2.58664	6.11557e-07
ENSG00000167011.9	1.09959	0.0184187
ENSG00000170629.14	1.35061	3.90992e-20
ENSG00000228742.11	3.65446	0.00182996
ENSG00000272854.1	1.13243	0.000502381
ENSG00000091128.13	1.69356	4.10502e-16
ENSG00000091129.21	1.09282	2.40846e-09
ENSG00000226965.2	1.60907	0.00164302
ENSG00000237870.6	1.13612	0.00694772
ENSG00000106013.15	1.63817	0.00347324
ENSG00000225546.6	7.37221	7.68458e-208
ENSG00000230316.7	4.47283	3.61871e-66
ENSG00000242593.7	1.41611	0.0200028
ENSG00000275356.4	1.64996	6.07592e-07
ENSG00000135253.14	1.50763	9.64064e-22
ENSG00000128578.10	2.11303	5.00876e-78
ENSG00000240204.3	2.13642	3.59294e-13
ENSG00000158525.15	3.0384	1.20811e-13
ENSG00000236753.7	1.12727	2.05819e-55
ENSG00000198074.10	2.4739	2.51914e-36
ENSG00000227471.9	3.92253	5.98524e-37
ENSG00000286458.1	1.2906	0.00064708
ENSG00000146857.4	1.82614	1.25011e-06
ENSG00000157680.15	2.22972	1.50609e-48
ENSG00000236279.7	5.40873	8.61995e-11
ENSG00000231840.2	1.55341	7.29212e-15
ENSG00000106462.11	1.45665	1.01494e-102
ENSG00000281189.1	1.30565	1.23922e-24
ENSG00000240877.3	1.06938	0.000523052
ENSG00000188707.6	1.13233	2.92481e-66
ENSG00000196584.3	2.69152	2.97044e-138
ENSG00000234722.5	4.1053	1.20315e-17
ENSG00000146918.20	1.46627	4.61096e-116
ENSG00000231419.6	1.99932	0.00253312
ENSG00000182366.10	1.81606	0.000141566
ENSG00000183117.19	5.02397	1.89626e-86
ENSG00000091879.13	1.2488	1.40861e-32
ENSG00000284610.1	3.06811	6.00163e-07
ENSG00000175445.17	2.09789	9.44512e-72
ENSG00000246130.1	1.47035	0.0192944
ENSG00000253616.5	2.10816	5.92149e-23
ENSG00000284948.1	1.76458	5.69843e-13
ENSG00000134013.16	1.14741	3.04558e-31
ENSG00000159167.12	1.58411	4.40144e-41
ENSG00000134028.14	1.94829	2.36863e-20
ENSG00000184661.14	3.44326	4.91849e-154
ENSG00000221818.9	4.43216	5.61558e-117
ENSG00000171320.15	1.88373	3.24816e-64
ENSG00000168078.10	3.7769	4.40488e-222
ENSG00000253490.5	2.67669	1.29612e-14
ENSG00000253642.6	6.82329	7.14233e-11
ENSG00000156687.11	2.44751	0.0221568
ENSG00000253363.7	6.76151	2.98334e-54
ENSG00000253161.5	1.57133	0.000209914
ENSG00000253414.3	1.63121	3.33639e-08
ENSG00000147536.12	1.62935	2.37015e-83
ENSG00000248498.4	7.68358	7.87093e-18
ENSG00000104738.18	1.43532	6.50758e-116
ENSG00000253608.2	1.60441	0.00665346
ENSG00000147485.13	2.48779	1.90242e-42
ENSG00000147509.14	3.40743	0.000315831
ENSG00000178538.10	1.06194	5.24884e-08
ENSG00000228862.4	1.18651	0.00173491
ENSG00000177182.11	2.38269	3.35176e-34
ENSG00000272192.1	1.68982	0.00203425
ENSG00000178460.18	1.61771	1.10491e-68
ENSG00000165078.13	5.26894	1.29851e-21
ENSG00000221947.8	1.19655	3.31095e-19
ENSG00000285579.1	1.58674	0.0070727
ENSG00000253339.2	1.01209	1.0254e-06
ENSG00000253983.3	1.63886	3.62055e-05
ENSG00000254349.6	4.41514	5.24703e-66
ENSG00000253706.5	5.58665	4.52562e-06
ENSG00000137558.9	1.85161	1.04037e-18
ENSG00000287352.1	2.15905	7.42454e-19
ENSG00000254266.6	2.56063	0.000603128
ENSG00000286675.1	1.60018	0.0103176
ENSG00000272138.2	1.90057	4.20202e-37
ENSG00000254331.1	1.13855	0.000756909
ENSG00000272425.1	1.11372	0.0192944
ENSG00000164687.11	1.05283	1.4377e-24
ENSG00000254394.2	6.21353	0.0362331
ENSG00000253898.1	6.01998	1.23448e-79
ENSG00000147614.4	3.17639	3.97559e-36
ENSG00000176566.5	4.25875	1.23116e-31
ENSG00000253553.7	2.81598	9.56956e-09
ENSG00000104327.7	3.57076	0.00130571
ENSG00000253394.6	1.21446	0.0393016
ENSG00000246792.3	1.08919	2.77718e-09
ENSG00000123119.12	2.1123	4.93091e-14
ENSG00000268080.2	7.40635	1.41076e-28
ENSG00000175305.17	1.65048	9.01634e-72
ENSG00000271930.1	3.31646	0.000210008
ENSG00000164920.9	2.00469	4.84851e-21
ENSG00000156509.14	2.68513	4.74934e-121
ENSG00000253395.1	2.90802	5.70981e-15
ENSG00000247081.8	1.15497	1.81633e-27
ENSG00000286337.1	1.02807	0.0180426
ENSG00000164932.13	2.34417	4.66185e-46
ENSG00000176406.23	1.37678	0.000158124
ENSG00000164935.6	1.23465	1.25296e-05
ENSG00000279138.1	2.43985	2.03767e-23
ENSG00000251003.9	1.42379	1.64468e-15
ENSG00000164841.5	1.84239	5.57461e-46
ENSG00000253877.6	5.79189	1.19005e-38
ENSG00000286362.1	2.60014	4.33068e-21
ENSG00000136982.6	1.67495	1.44907e-126
ENSG00000279347.1	1.15289	2.02773e-08
ENSG00000172167.8	1.65787	3.71971e-122
ENSG00000255364.1	2.15164	9.73921e-21
ENSG00000255325.2	1.88551	6.75021e-18
ENSG00000263443.1	2.89472	6.28015e-12
ENSG00000156787.17	1.21586	2.52189e-133
ENSG00000156802.13	1.03655	2.48548e-52
ENSG00000283172.1	1.24693	1.06424e-06
ENSG00000156804.7	1.03488	1.09833e-28
ENSG00000175946.8	1.40143	0.00280736
ENSG00000214814.7	4.34517	1.51108e-25
ENSG00000253227.2	5.63605	3.19363e-49
ENSG00000180938.6	1.14909	7.84148e-55
ENSG00000253513.1	2.1206	0.0441616
ENSG00000104549.12	1.51817	1.6312e-46
ENSG00000156831.8	1.03555	1.61067e-87
ENSG00000249375.8	1.09373	0.000120254
ENSG00000285108.1	3.98358	3.22849e-12
ENSG00000147697.9	3.61267	9.9481e-40
ENSG00000184156.17	1.4741	1.55595e-21
ENSG00000254101.7	1.14006	6.59968e-08
ENSG00000169427.8	3.99935	1.26431e-38
ENSG00000253307.1	1.06957	0.019058
ENSG00000261693.1	1.68714	5.5958e-15
ENSG00000176956.12	4.0377	1.91907e-27
ENSG00000181638.19	1.12	1.1116e-49
ENSG00000254389.3	1.32524	1.10254e-25
ENSG00000254338.1	6.24123	1.53245e-05
ENSG00000182759.4	2.38839	0.0159396
ENSG00000287576.1	1.16628	2.2212e-20
ENSG00000179886.6	1.05212	6.82704e-45
ENSG00000265660.1	1.82277	2.34741e-22
ENSG00000160949.17	1.24184	6.45103e-49
ENSG00000160957.13	2.00233	1.74047e-100
ENSG00000255559.1	1.15941	1.76034e-24
ENSG00000235330.2	1.19158	0.00808894
ENSG00000270372.1	5.84873	9.907e-19
ENSG00000107165.13	1.46898	2.30944e-06
ENSG00000285637.2	1.46471	0.000378033
ENSG00000214121.4	1.04539	0.00961378
ENSG00000270547.6	2.1054	2.7953e-25
ENSG00000215237.6	1.13384	0.00415956
ENSG00000147889.17	2.61057	5.18073e-158
ENSG00000240498.9	2.53873	1.61066e-112
ENSG00000147883.12	1.65238	1.23776e-77
ENSG00000107105.15	2.99241	2.17297e-16
ENSG00000231991.4	1.3494	6.43895e-39
ENSG00000186638.16	1.86906	8.60466e-118
ENSG00000178723.7	1.11949	0.00313586
ENSG00000137135.18	3.111	1.20798e-208
ENSG00000215183.5	1.24667	0.00012803
ENSG00000196196.3	1.78097	2.83878e-53
ENSG00000165304.8	3.76471	4.34639e-281
ENSG00000230804.2	1.22379	0.0457016
ENSG00000182021.10	1.61245	0.000572234
ENSG00000204669.11	1.76637	0.00830922
ENSG00000165091.17	1.21211	2.70057e-14
ENSG00000228430.9	3.17032	6.01824e-18
ENSG00000172159.16	1.06139	1.09893e-28
ENSG00000269994.3	2.06023	3.93125e-06
ENSG00000188312.14	1.19006	6.06318e-86
ENSG00000136943.11	1.6808	1.33493e-20
ENSG00000203279.4	1.69652	2.64441e-22
ENSG00000204291.11	2.74921	5.68817e-102
ENSG00000170681.7	1.15979	1.19906e-19
ENSG00000106701.12	1.28362	6.81702e-59
ENSG00000186051.7	2.22927	4.24764e-21
ENSG00000260230.3	1.57388	4.12491e-10
ENSG00000188959.9	1.16076	1.14014e-11
ENSG00000228623.6	2.13031	2.6918e-29
ENSG00000181634.8	1.02358	1.16648e-11
ENSG00000234692.1	4.88608	8.578e-07
ENSG00000228714.4	6.09486	3.51228e-90
ENSG00000234156.3	1.55223	6.15726e-12
ENSG00000136931.10	2.12524	0.0172091
ENSG00000236643.1	1.02014	2.12345e-07
ENSG00000185585.20	1.45575	9.57202e-32
ENSG00000232850.3	1.4706	3.45736e-15
ENSG00000148346.12	1.37052	2.702e-15
ENSG00000287234.1	1.08445	1.52032e-11
ENSG00000226355.2	2.20706	7.47848e-07
ENSG00000130711.4	1.35068	1.93858e-09
ENSG00000130720.13	4.30276	0.0169543
ENSG00000176868.2	1.07997	1.52288e-06
ENSG00000273473.1	1.13292	1.66481e-10
ENSG00000122133.17	3.12007	1.74511e-09
ENSG00000238058.2	1.00918	8.3039e-19
ENSG00000107187.17	3.80458	4.36958e-11
ENSG00000186193.9	1.9599	4.9259e-31
ENSG00000205740.2	1.42592	5.62257e-21
ENSG00000286610.1	6.24181	0.046139
ENSG00000229672.3	1.34137	4.62554e-06
ENSG00000196139.14	1.34283	2.44985e-62
ENSG00000287848.1	2.0039	6.31127e-20
ENSG00000224034.1	3.73855	8.91565e-58
ENSG00000215267.8	3.19228	5.55523e-52
ENSG00000287566.1	2.73494	3.3197e-10
ENSG00000232591.2	1.67956	0.000648868
ENSG00000225383.8	5.15991	7.27413e-87
ENSG00000065328.16	3.29538	1.01876e-178
ENSG00000176244.7	1.67279	3.00824e-40
ENSG00000204832.10	5.60184	6.62871e-258
ENSG00000251803.1	5.32268	0.0034587
ENSG00000260589.1	1.16659	4.47387e-16
ENSG00000077327.16	1.57402	3.18789e-05
ENSG00000229932.3	1.06848	3.89724e-07
ENSG00000285859.1	1.23208	1.38222e-05
ENSG00000273107.1	1.14596	0.00444536
ENSG00000151025.11	3.18757	4.29087e-89
ENSG00000279212.1	1.90424	0.00852335
ENSG00000262412.1	1.17458	9.047e-08
ENSG00000230445.4	2.81819	3.50498e-44
ENSG00000238021.6	2.68009	4.59434e-08
ENSG00000165757.9	1.26602	1.56218e-43
ENSG00000215146.5	1.13119	2.03544e-14
ENSG00000273008.1	1.05245	5.64074e-12
ENSG00000263639.7	1.00992	2.52881e-05
ENSG00000231187.3	1.52208	7.63913e-29
ENSG00000170324.21	1.02653	0.0208423
ENSG00000236671.9	2.9853	0.000679445
ENSG00000107984.10	1.96761	7.66136e-17
ENSG00000231131.8	2.40743	9.82823e-43
ENSG00000122952.17	2.3559	2.35548e-161
ENSG00000287016.1	2.58805	3.23914e-16
ENSG00000165443.12	1.16568	4.11314e-18
ENSG00000170312.16	3.02009	7.1032e-218
ENSG00000182010.11	1.92712	1.03038e-53
ENSG00000138311.17	1.05247	0.00473647
ENSG00000228566.2	1.50941	0.0110309
ENSG00000213606.3	2.96844	6.76353e-14
ENSG00000222047.8	1.56242	3.65459e-05
ENSG00000233871.2	1.47551	3.52047e-30
ENSG00000133665.13	1.77787	3.59089e-22
ENSG00000178217.14	1.84556	1.47236e-08
ENSG00000286876.1	4.76512	0.000179221
ENSG00000229404.6	4.72702	0.00912297
ENSG00000287077.1	1.04109	9.61587e-11
ENSG00000138160.6	1.97411	1.43564e-129
ENSG00000138180.16	3.10729	8.49647e-173
ENSG00000138193.15	1.11059	2.48921e-24
ENSG00000268894.7	2.81929	0.00394965
ENSG00000119969.15	1.85611	5.76518e-109
ENSG00000287009.1	1.54914	9.64807e-23
ENSG00000172987.12	3.09709	0.00028741
ENSG00000273162.1	2.22961	2.14816e-29
ENSG00000107807.13	1.86144	6.93145e-42
ENSG00000119915.5	1.15963	3.33229e-06
ENSG00000213061.2	2.18146	5.36357e-18
ENSG00000280693.2	1.91792	0.0268148
ENSG00000065618.21	1.04617	4.55663e-05
ENSG00000230018.1	3.20813	2.97324e-05
ENSG00000285715.1	1.27167	2.31114e-07
ENSG00000255624.3	1.37103	1.18185e-15
ENSG00000227076.1	1.04389	0.0294929
ENSG00000148773.14	3.05955	6.0172e-217
ENSG00000108001.13	1.55145	2.08772e-17
ENSG00000151640.13	1.10061	0.000132288
ENSG00000184524.6	2.0665	0.000394628
ENSG00000180785.10	2.41512	1.1277e-41
ENSG00000167332.9	3.2073	3.29216e-07
ENSG00000121236.21	1.05833	2.46792e-19
ENSG00000184478.7	6.27591	0.00029063
ENSG00000245522.2	1.21399	2.02465e-16
ENSG00000251381.8	5.17543	0.0261247
ENSG00000175868.14	1.02385	4.12294e-11
ENSG00000188162.11	3.55411	0.0411729
ENSG00000110786.18	1.02084	0.0166066
ENSG00000129173.13	3.641	8.4087e-180
ENSG00000287753.1	7.62216	0.0438345
ENSG00000169550.14	4.18239	1.16262e-12
ENSG00000254560.6	3.17598	1.53231e-10
ENSG00000109881.17	1.05517	1.50525e-46
ENSG00000121621.7	3.32433	1.59884e-205
ENSG00000007372.23	4.70997	3.86474e-06
ENSG00000247151.7	2.04721	6.91792e-15
ENSG00000255521.2	1.00573	0.00102781
ENSG00000285751.1	1.21429	0.00709617
ENSG00000110492.15	2.37279	1.08225e-95
ENSG00000247675.7	1.84001	1.65923e-08
ENSG00000287538.1	4.74143	0.042671
ENSG00000189057.11	3.05146	3.83606e-155
ENSG00000255008.3	1.14995	6.59106e-12
ENSG00000234964.4	1.46925	1.71083e-11
ENSG00000183134.5	1.19371	7.48475e-12
ENSG00000006118.14	1.37716	3.94183e-34
ENSG00000243742.5	3.31746	7.80499e-16
ENSG00000168496.4	1.36727	2.44916e-114
ENSG00000149503.13	1.14984	6.0446e-73
ENSG00000146670.10	3.3682	6.74419e-279
ENSG00000254501.1	1.19683	0.000226281
ENSG00000255173.1	1.05817	0.006849
ENSG00000278952.1	1.30544	4.95033e-15
ENSG00000173825.7	1.07548	5.07511e-20
ENSG00000173727.12	1.30214	5.52518e-27
ENSG00000172803.18	1.17977	4.93395e-07
ENSG00000184224.3	1.22434	0.00189825
ENSG00000255306.1	1.51285	3.0919e-12
ENSG00000132749.11	1.46116	1.60469e-30
ENSG00000254721.1	1.14206	0.000183736
ENSG00000261594.4	1.57109	9.53618e-16
ENSG00000165490.13	1.93269	3.15585e-118
ENSG00000279742.1	1.33999	5.48167e-07
ENSG00000086991.13	2.15051	3.82879e-57
ENSG00000214391.3	1.43357	4.78623e-13
ENSG00000255666.7	1.34648	0.0119302
ENSG00000137672.13	2.03072	2.87185e-53
ENSG00000255282.6	2.70205	4.33553e-15
ENSG00000166670.10	1.23997	7.18926e-06
ENSG00000196611.5	1.34831	4.24525e-10
ENSG00000149968.12	2.82742	0.00216314
ENSG00000262406.3	4.70436	4.4442e-61
ENSG00000254750.1	1.2461	9.52585e-10
ENSG00000255221.3	1.19291	2.02283e-09
ENSG00000255501.3	6.19581	3.23353e-62
ENSG00000170290.4	4.90886	0.000660882
ENSG00000214290.8	1.1006	3.08304e-22
ENSG00000288097.1	2.70084	0.00142979
ENSG00000227487.4	1.79875	4.58307e-08
ENSG00000149305.7	3.82564	0.0160872
ENSG00000255689.1	1.55008	1.59816e-17
ENSG00000255599.1	1.91751	0.0138661
ENSG00000260254.1	3.37784	2.53807e-10
ENSG00000226645.1	1.10197	0.000206881
ENSG00000280032.1	2.63001	9.11554e-19
ENSG00000154096.13	1.80698	1.05834e-51
ENSG00000110400.11	1.13067	5.95856e-39
ENSG00000255298.3	4.44523	0.0230991
ENSG00000196119.8	6.10936	0.0198708
ENSG00000250073.3	1.16632	6.73162e-07
ENSG00000149554.13	2.36308	4.03161e-147
ENSG00000245008.4	3.50778	3.84947e-09
ENSG00000120457.12	2.15817	8.36332e-68
ENSG00000287426.1	2.12508	0.00217568
ENSG00000254481.1	1.52597	8.461e-12
ENSG00000166105.16	2.85958	3.77137e-10
ENSG00000256694.1	1.01482	2.03024e-11
ENSG00000249628.3	1.48256	0.000175335
ENSG00000111206.12	3.67301	6.9791e-286
ENSG00000171792.11	1.01424	1.72187e-76
ENSG00000111247.14	2.18143	2.10947e-133
ENSG00000256417.1	5.9549	5.47683e-08
ENSG00000047617.15	1.46722	8.06475e-20
ENSG00000110799.13	1.34683	1.31178e-29
ENSG00000010292.13	1.03721	2.42775e-81
ENSG00000255966.1	1.21401	6.76308e-13
ENSG00000111665.11	2.29812	1.93204e-127
ENSG00000176654.12	1.913	1.12627e-09
ENSG00000197614.11	1.20276	1.13849e-06
ENSG00000249790.3	2.40432	3.22215e-23
ENSG00000256673.1	1.53377	1.49026e-31
ENSG00000214776.12	1.23492	7.5355e-14
ENSG00000183150.8	1.97271	1.74423e-40
ENSG00000180861.9	1.16103	0.00010803
ENSG00000256084.1	1.31978	0.000131936
ENSG00000070019.5	2.60946	2.42629e-26
ENSG00000256663.1	3.17417	5.8607e-19
ENSG00000139155.8	2.46877	3.19332e-36
ENSG00000134548.11	1.65026	6.36263e-39
ENSG00000060982.15	1.33273	1.35174e-37
ENSG00000245614.4	1.63939	5.84999e-35
ENSG00000274964.1	1.04888	3.48503e-15
ENSG00000245482.2	4.43025	0.0387238
ENSG00000205592.14	1.68	0.0422518
ENSG00000173157.17	3.98374	1.52799e-11
ENSG00000134291.12	1.27533	9.3338e-110
ENSG00000181418.8	1.28785	3.20994e-05
ENSG00000257913.2	1.79481	1.26359e-18
ENSG00000167550.11	1.23081	4.34593e-31
ENSG00000123416.15	1.11336	2.20478e-101
ENSG00000135451.13	3.29422	1.15848e-199
ENSG00000186897.5	2.11052	0.00249673
ENSG00000123352.17	1.12725	6.02824e-98
ENSG00000257954.1	1.07202	0.00061239
ENSG00000258284.1	1.07877	0.0093235
ENSG00000161800.13	2.22717	1.19983e-238
ENSG00000110881.11	1.33337	3.64362e-17
ENSG00000260122.1	1.37006	9.33061e-07
ENSG00000261308.2	1.63222	2.45998e-52
ENSG00000259887.1	1.85285	1.7111e-20
ENSG00000167612.13	1.38879	0.00358766
ENSG00000135476.12	1.29379	4.00705e-45
ENSG00000257605.2	1.30858	3.92689e-16
ENSG00000197757.8	4.18436	1.28265e-06
ENSG00000180806.5	6.13383	0.000430981
ENSG00000170627.11	1.24834	6.57567e-11
ENSG00000139645.10	1.02557	5.62189e-66
ENSG00000198056.15	1.28007	6.74868e-59
ENSG00000166866.13	1.93443	6.16535e-41
ENSG00000182379.10	3.29808	4.28497e-42
ENSG00000185633.10	1.84207	3.21813e-51
ENSG00000155980.12	1.88074	3.49894e-12
ENSG00000135454.14	2.58491	1.59725e-60
ENSG00000257698.2	1.20386	5.70331e-61
ENSG00000257159.1	1.10039	0.00530852
ENSG00000185306.13	3.17114	5.5139e-06
ENSG00000255693.3	1.362	0.0212509
ENSG00000149948.13	1.49454	4.39271e-05
ENSG00000286563.1	1.35	1.38553e-08
ENSG00000256037.1	1.31871	3.62519e-06
ENSG00000090382.7	1.06513	4.22399e-15
ENSG00000257764.2	1.80308	1.77085e-07
ENSG00000257761.3	3.70834	1.67684e-19
ENSG00000251138.7	7.16561	1.0549e-107
ENSG00000258320.1	9.41126	0.00523256
ENSG00000258088.1	1.50227	0.000165652
ENSG00000165891.16	3.48634	5.15394e-153
ENSG00000257191.1	8.22262	2.2497e-07
ENSG00000258815.1	3.35478	4.13269e-14
ENSG00000281333.2	1.22129	1.15652e-08
ENSG00000258125.1	6.57598	5.95988e-10
ENSG00000257893.3	5.04967	1.82958e-23
ENSG00000257345.2	2.14712	0.0412373
ENSG00000257512.1	1.24555	2.94185e-29
ENSG00000136040.9	1.49714	1.75124e-46
ENSG00000258172.1	2.04978	9.45413e-07
ENSG00000278916.1	1.66902	2.72987e-29
ENSG00000255794.8	2.69804	1.60204e-13
ENSG00000207586.1	3.14407	0.0264595
ENSG00000257167.2	1.04153	3.61358e-43
ENSG00000139354.11	1.13903	1.30827e-36
ENSG00000257803.2	1.71486	0.000227033
ENSG00000196091.15	2.64592	7.59946e-34
ENSG00000185480.11	2.5678	2.58895e-173
ENSG00000183395.5	1.35693	5.40892e-06
ENSG00000258169.1	1.85605	2.52163e-06
ENSG00000198431.16	1.17458	3.71876e-46
ENSG00000257732.1	3.60849	0.00416039
ENSG00000257642.1	1.35223	0.0227269
ENSG00000257398.8	1.02671	0.00155749
ENSG00000174527.9	4.192	6.99405e-19
ENSG00000280426.1	1.2071	3.14022e-13
ENSG00000286220.1	1.13641	0.000141422
ENSG00000166578.10	1.53139	2.38254e-37
ENSG00000249550.7	4.97537	3.70705e-53
ENSG00000257883.1	1.53263	0.000495728
ENSG00000135119.14	2.07445	5.10567e-60
ENSG00000135127.11	1.32536	9.48897e-36
ENSG00000170890.14	1.1119	6.76351e-14
ENSG00000256364.1	1.4521	2.51421e-10
ENSG00000256742.1	1.36212	9.82878e-11
ENSG00000255856.2	1.1506	8.15552e-19
ENSG00000184445.12	1.25496	2.88725e-69
ENSG00000111325.16	1.059	1.08541e-46
ENSG00000178882.15	1.47176	3.65112e-07
ENSG00000256128.6	1.08742	4.02125e-19
ENSG00000249345.8	1.29955	4.32141e-15
ENSG00000279516.2	4.44702	1.69943e-08
ENSG00000278291.1	1.63076	2.40684e-24
ENSG00000165480.16	3.62785	2.84687e-244
ENSG00000262619.2	3.28994	0.024426
ENSG00000251299.1	2.20331	2.14141e-05
ENSG00000237637.1	1.39344	3.86313e-08
ENSG00000139618.15	1.08089	1.49357e-39
ENSG00000133116.8	1.06776	9.81844e-18
ENSG00000133119.13	1.07245	8.6473e-73
ENSG00000230710.2	2.50052	0.0295509
ENSG00000283554.1	2.67775	0.00147565
ENSG00000274270.1	1.74865	1.08432e-17
ENSG00000278238.1	1.35854	4.61138e-25
ENSG00000136108.15	1.66379	1.98153e-143
ENSG00000244471.6	2.17886	0.00801567
ENSG00000287460.1	1.8662	5.41178e-07
ENSG00000278630.1	6.66941	2.6044e-53
ENSG00000139734.19	3.23092	5.66809e-179
ENSG00000219926.11	7.58872	2.11656e-09
ENSG00000227674.3	7.52116	1.7531e-88
ENSG00000237849.1	9.00853	5.82402e-14
ENSG00000235221.3	6.98463	1.90777e-24
ENSG00000236534.1	1.0707	0.0255753
ENSG00000136122.17	1.08144	1.69162e-63
ENSG00000271776.1	4.06926	0.00707998
ENSG00000286284.1	6.31995	0.000606677
ENSG00000228824.7	1.48513	5.28663e-05
ENSG00000272046.1	2.38335	9.58271e-11
ENSG00000288552.1	6.75174	9.95963e-109
ENSG00000125257.16	1.00908	2.9178e-22
ENSG00000125249.7	1.24463	8.41963e-88
ENSG00000139800.8	7.2896	2.35878e-106
ENSG00000288060.1	6.12128	6.5512e-10
ENSG00000043355.12	6.18234	2.38319e-165
ENSG00000187498.16	1.39342	2.32263e-44
ENSG00000150403.18	1.01355	3.39851e-53
ENSG00000225210.10	3.23808	8.25599e-119
ENSG00000286614.1	2.9309	4.64091e-17
ENSG00000244306.11	2.65404	4.94679e-117
ENSG00000274827.4	5.92499	0.0444261
ENSG00000275552.1	1.10632	2.7885e-05
ENSG00000139880.19	1.07137	3.68026e-31
ENSG00000286931.1	1.97737	1.78755e-34
ENSG00000168952.15	1.55017	9.96603e-79
ENSG00000257842.6	6.30297	9.97076e-50
ENSG00000258081.4	5.78138	3.52195e-19
ENSG00000257185.2	5.59065	2.38577e-20
ENSG00000257612.2	3.65899	0.0163077
ENSG00000258932.5	6.59582	8.15854e-24
ENSG00000257869.1	7.18155	4.21716e-28
ENSG00000258038.6	5.06557	1.46262e-08
ENSG00000258028.3	4.93857	0.000639131
ENSG00000257636.6	7.8434	1.33122e-16
ENSG00000100473.18	1.60358	2.74619e-20
ENSG00000258474.1	3.85742	1.26028e-27
ENSG00000260046.1	1.07506	1.83967e-06
ENSG00000165496.5	6.75486	0.00858779
ENSG00000259129.6	1.68794	0.00311493
ENSG00000100479.13	1.26467	1.81272e-60
ENSG00000258857.1	1.94009	9.83901e-08
ENSG00000285747.1	1.97707	0.00520754
ENSG00000258955.2	2.35599	0.000671159
ENSG00000237356.7	1.33614	4.45006e-21
ENSG00000225680.1	2.78771	1.587e-37
ENSG00000287156.1	1.09125	0.00281769
ENSG00000100526.20	3.69272	3.36944e-294
ENSG00000198554.12	1.82031	3.98016e-124
ENSG00000126787.13	3.76961	6.42733e-252
ENSG00000259868.3	1.38073	2.37464e-08
ENSG00000286257.2	2.00682	2.18311e-05
ENSG00000286355.1	2.27218	0.0225898
ENSG00000126778.12	4.74481	8.89766e-55
ENSG00000100625.9	2.39784	1.27898e-46
ENSG00000258837.1	3.26768	4.17923e-26
ENSG00000139985.7	1.51962	6.94104e-10
ENSG00000245466.1	1.35848	0.0255844
ENSG00000258689.1	3.45543	1.56197e-10
ENSG00000259153.2	1.70646	2.08513e-50
ENSG00000258976.1	2.335	9.73566e-06
ENSG00000211448.12	2.19503	5.41832e-20
ENSG00000283627.1	5.35957	6.80998e-23
ENSG00000258884.2	1.01511	1.22624e-13
ENSG00000100604.13	3.43794	0.00172893
ENSG00000089723.10	1.78772	1.06871e-106
ENSG00000258927.2	2.86742	1.15548e-13
ENSG00000270038.1	3.97927	0.000299498
ENSG00000100739.11	1.18728	2.46513e-07
ENSG00000259230.1	3.97965	3.47154e-09
ENSG00000126215.14	1.40344	2.83949e-72
ENSG00000170779.11	1.21865	1.00513e-68
ENSG00000226174.7	1.51142	2.08055e-27
ENSG00000251602.7	1.0772	7.00672e-24
ENSG00000270816.6	5.68766	1.35327e-34
ENSG00000179455.9	4.03088	1.7359e-111
ENSG00000285077.2	1.47599	2.11488e-35
ENSG00000187951.11	1.67192	1.34379e-59
ENSG00000259772.6	1.13307	2.51388e-12
ENSG00000169926.11	1.00618	7.75658e-63
ENSG00000198826.11	2.46476	4.03807e-194
ENSG00000246863.2	1.43425	1.67253e-08
ENSG00000156970.12	3.26225	1.93373e-220
ENSG00000273786.1	7.12846	0.00181215
ENSG00000137812.19	1.42061	3.59063e-73
ENSG00000051180.17	2.17033	4.74953e-124
ENSG00000166143.9	3.36185	7.10224e-20
ENSG00000128917.8	1.15654	2.82257e-38
ENSG00000104147.9	2.96271	4.5329e-154
ENSG00000137825.11	1.47704	1.83984e-27
ENSG00000259883.2	1.83838	3.08212e-08
ENSG00000188089.13	1.36225	0.046894
ENSG00000278769.1	1.24355	0.00449615
ENSG00000274403.1	1.13586	0.00727246
ENSG00000128886.12	1.27648	1.06734e-20
ENSG00000092470.12	2.1861	2.66391e-162
ENSG00000285597.1	1.10619	3.26636e-05
ENSG00000259488.2	1.57106	1.24755e-22
ENSG00000259469.1	1.22739	0.0119539
ENSG00000137869.15	2.55504	2.71025e-16
ENSG00000186417.14	1.35022	5.05718e-18
ENSG00000259438.1	1.46841	1.58116e-14
ENSG00000274528.1	1.01813	1.24714e-12
ENSG00000259712.1	2.69924	8.12223e-24
ENSG00000138587.6	1.3295	3.61044e-27
ENSG00000245975.2	1.3414	5.68619e-22
ENSG00000157456.8	3.48904	1.21879e-273
ENSG00000277144.1	1.0043	0.00518215
ENSG00000140297.13	1.68616	1.73845e-16
ENSG00000182718.16	1.06251	3.93058e-46
ENSG00000259616.2	2.33919	0.000246338
ENSG00000259251.2	1.52815	1.60051e-11
ENSG00000274340.1	1.24902	0.000545703
ENSG00000074410.14	2.59474	1.52682e-37
ENSG00000197361.7	1.21512	1.63524e-21
ENSG00000035664.11	1.27024	9.26597e-66
ENSG00000166803.13	1.45177	1.56369e-60
ENSG00000140451.13	1.48592	1.47247e-49
ENSG00000186198.4	1.8488	1.32874e-31
ENSG00000277351.1	2.12984	0.0325111
ENSG00000103710.11	1.02077	1.52653e-17
ENSG00000174498.14	3.63471	1.58628e-05
ENSG00000103742.12	1.23909	8.83397e-08
ENSG00000174442.12	1.12962	1.52235e-99
ENSG00000128973.13	1.00407	1.92118e-86
ENSG00000137807.15	3.14385	2.81643e-231
ENSG00000259215.1	1.2134	0.000277851
ENSG00000280639.1	1.31395	1.75822e-06
ENSG00000260339.1	1.22704	2.66065e-25
ENSG00000137868.19	2.10644	8.16878e-10
ENSG00000261821.2	1.16095	5.70306e-08
ENSG00000187812.12	3.33249	4.30279e-05
ENSG00000169758.13	3.15368	1.55712e-25
ENSG00000159556.10	2.63609	2.38731e-13
ENSG00000103740.10	1.59298	4.84485e-07
ENSG00000169684.13	1.32569	1.36813e-17
ENSG00000080644.16	1.88006	0.0285449
ENSG00000117971.12	2.70084	3.70852e-31
ENSG00000058335.15	1.38092	2.03802e-14
ENSG00000103888.17	1.77354	1.44872e-18
ENSG00000225151.10	1.62201	1.60054e-22
ENSG00000197696.10	1.00748	3.67086e-32
ENSG00000229212.8	1.67585	1.52409e-10
ENSG00000157766.18	2.54376	1.08147e-24
ENSG00000140525.17	1.80078	2.77527e-132
ENSG00000140534.14	4.01726	5.70574e-162
ENSG00000188095.6	3.29336	3.27405e-74
ENSG00000197299.12	1.76404	1.72401e-72
ENSG00000258384.1	1.42416	0.0221517
ENSG00000198901.14	2.90303	3.10657e-91
ENSG00000284946.1	2.23405	2.25492e-60
ENSG00000258725.2	1.41256	3.69659e-18
ENSG00000214432.9	1.42319	3.18194e-09
ENSG00000278514.1	2.26234	0.0348343
ENSG00000258527.1	3.72656	1.15435e-53
ENSG00000231439.4	1.92849	0.00602792
ENSG00000185615.15	1.42974	1.10701e-09
ENSG00000236829.9	1.2464	3.61784e-16
ENSG00000261713.6	1.65437	0.0352561
ENSG00000265386.2	1.01259	0.00974016
ENSG00000162063.13	2.12775	7.26151e-174
ENSG00000260874.5	1.38391	3.28493e-20
ENSG00000162062.15	2.29109	4.86349e-97
ENSG00000127564.17	2.18285	6.71344e-103
ENSG00000162073.14	1.46166	1.46328e-67
ENSG00000262668.2	4.03786	8.87653e-17
ENSG00000168124.2	5.64876	0.0130353
ENSG00000260289.2	6.72032	5.2181e-71
ENSG00000261319.1	3.46016	3.23004e-11
ENSG00000175643.10	1.92782	1.44994e-99
ENSG00000263080.1	2.68783	2.57192e-29
ENSG00000259876.1	4.67547	0.00184384
ENSG00000259899.1	4.82907	7.09987e-06
ENSG00000262097.2	1.11691	7.41983e-13
ENSG00000170537.13	1.22552	4.97142e-26
ENSG00000261357.1	1.62254	0.0127807
ENSG00000260430.2	1.23623	0.000113062
ENSG00000005189.19	1.11274	1.2617e-52
ENSG00000158486.13	3.50542	8.49011e-09
ENSG00000287809.1	1.58543	6.81478e-11
ENSG00000166851.15	1.96121	2.25187e-103
ENSG00000251417.2	1.20593	7.40688e-25
ENSG00000260442.5	1.01488	1.94334e-08
ENSG00000260367.2	1.74811	1.37164e-12
ENSG00000214725.9	1.66036	3.03656e-11
ENSG00000149926.13	2.95653	8.68037e-32
ENSG00000260167.1	2.27307	4.59077e-25
ENSG00000177238.14	1.34331	0.000139507
ENSG00000260644.6	2.96914	1.26327e-05
ENSG00000260518.2	5.03332	1.75693e-88
ENSG00000261580.1	7.63637	0.0179925
ENSG00000261239.6	3.72483	0.0258408
ENSG00000171241.9	2.62604	5.42472e-147
ENSG00000091651.9	2.58633	1.13784e-159
ENSG00000171208.10	1.10424	5.16778e-26
ENSG00000260086.3	1.39292	6.50353e-32
ENSG00000283689.1	3.42435	7.82824e-29
ENSG00000277559.1	2.37228	1.72235e-31
ENSG00000245694.10	1.67865	7.59011e-50
ENSG00000176842.15	3.26146	3.38348e-28
ENSG00000087250.8	1.49279	0.0208395
ENSG00000181938.13	1.14792	2.09965e-58
ENSG00000150394.14	1.89412	6.70108e-09
ENSG00000103064.15	1.09709	4.66747e-46
ENSG00000262136.1	1.01968	0.00287889
ENSG00000118557.16	1.69931	9.86922e-32
ENSG00000261008.7	1.51652	2.17201e-27
ENSG00000259209.3	1.085	6.15539e-08
ENSG00000262904.1	2.54621	2.15196e-20
ENSG00000183196.10	1.50735	2.67307e-07
ENSG00000244485.1	5.13023	8.70191e-23
ENSG00000152910.19	4.84716	3.98844e-15
ENSG00000140873.16	2.24376	2.79064e-16
ENSG00000261537.1	1.0362	1.1347e-12
ENSG00000259867.6	1.06375	2.9764e-09
ENSG00000140945.17	1.9869	1.55256e-91
ENSG00000131153.9	1.37527	6.32762e-52
ENSG00000167513.9	2.65184	6.53659e-134
ENSG00000003249.14	1.13468	7.50812e-25
ENSG00000126856.14	2.7711	2.10269e-21
ENSG00000261172.1	4.29988	2.77643e-28
ENSG00000231784.8	1.01678	1.14593e-08
ENSG00000177602.5	2.67907	5.23895e-67
ENSG00000161905.13	1.14056	5.95625e-07
ENSG00000129195.16	2.17202	4.70864e-41
ENSG00000178999.13	2.49362	4.70552e-133
ENSG00000262966.2	2.40165	0.0250545
ENSG00000188803.15	1.2674	0.00100484
ENSG00000251537.4	1.1888	5.96758e-06
ENSG00000221926.12	1.40067	3.38422e-42
ENSG00000233966.1	1.4993	4.61552e-17
ENSG00000237057.3	4.09065	0.000714456
ENSG00000226359.1	1.7031	0.00490701
ENSG00000180638.17	3.34145	0.000702632
ENSG00000226549.3	1.72007	3.01268e-07
ENSG00000265683.1	1.33108	1.78073e-18
ENSG00000007171.18	1.01212	4.3599e-11
ENSG00000260777.1	1.692	0.000868255
ENSG00000063015.20	1.71694	4.28931e-07
ENSG00000264808.1	1.60612	3.75042e-10
ENSG00000176208.9	1.39612	9.26507e-75
ENSG00000275185.1	1.05434	3.40698e-15
ENSG00000131242.18	1.02859	5.7623e-52
ENSG00000141314.13	1.19202	4.28203e-07
ENSG00000181374.8	1.32994	6.22158e-11
ENSG00000271013.1	1.3655	6.68206e-09
ENSG00000278023.6	3.1984	6.64608e-82
ENSG00000277182.1	1.4178	7.01627e-23
ENSG00000161381.14	1.18649	3.18484e-27
ENSG00000279199.1	1.03412	2.08428e-06
ENSG00000094804.12	2.73826	2.73164e-166
ENSG00000278918.1	1.6629	0.00286506
ENSG00000131747.15	3.67343	0
ENSG00000171431.4	4.03297	2.07596e-41
ENSG00000196859.8	1.38684	8.69399e-05
ENSG00000128422.17	1.16968	2.6165e-10
ENSG00000278954.1	2.43398	0.00152908
ENSG00000089558.9	1.61997	1.31448e-15
ENSG00000131470.14	1.44267	9.16652e-83
ENSG00000131462.8	1.17036	4.60449e-127
ENSG00000176563.10	1.3394	5.08977e-14
ENSG00000012048.23	1.03758	2.60783e-38
ENSG00000267151.5	1.48959	0.00114598
ENSG00000125319.14	1.3228	5.37546e-54
ENSG00000161664.7	3.93615	2.14809e-21
ENSG00000267750.6	1.29549	0.000404621
ENSG00000161682.15	1.19512	2.25139e-11
ENSG00000182963.10	1.52305	1.25653e-45
ENSG00000131097.7	2.40897	3.34884e-56
ENSG00000186185.14	3.62915	3.0096e-217
ENSG00000186868.15	2.29779	1.93202e-87
ENSG00000261575.2	1.08368	3.2549e-08
ENSG00000261886.1	1.30019	3.83626e-09
ENSG00000189120.5	2.10899	2.31796e-41
ENSG00000263412.1	1.34967	1.01574e-30
ENSG00000120068.7	4.81038	0.00640686
ENSG00000159217.10	3.72724	1.98455e-49
ENSG00000251461.3	4.1056	0.00246197
ENSG00000251550.1	5.2374	5.12731e-10
ENSG00000154920.14	3.02912	6.52441e-151
ENSG00000253102.1	1.37422	7.14056e-13
ENSG00000250286.2	1.8941	9.70891e-14
ENSG00000261873.2	3.34855	0.00161208
ENSG00000263120.1	1.41163	0.00152596
ENSG00000280028.1	1.15887	0.00489545
ENSG00000068489.12	2.26174	1.70315e-116
ENSG00000153982.11	1.10508	1.56998e-37
ENSG00000259349.2	1.13308	1.27046e-15
ENSG00000187013.4	1.6359	2.23228e-18
ENSG00000121075.11	4.78098	6.21529e-41
ENSG00000136492.9	1.20607	1.13393e-49
ENSG00000173826.14	4.27154	2.58952e-05
ENSG00000240280.7	3.12514	1.00454e-12
ENSG00000182481.9	1.45081	3.07144e-103
ENSG00000265055.2	1.36999	3.25528e-23
ENSG00000227036.8	2.02441	8.58922e-30
ENSG00000263680.2	3.6599	1.5065e-33
ENSG00000263843.1	1.1711	1.02362e-25
ENSG00000265342.1	2.2015	0.00301264
ENSG00000141576.16	1.06149	4.09697e-20
ENSG00000167900.12	2.05768	5.15929e-116
ENSG00000089685.15	2.81955	7.45213e-187
ENSG00000187775.17	1.39581	4.08519e-07
ENSG00000173894.11	2.03647	3.88313e-66
ENSG00000262772.2	1.66586	1.92352e-07
ENSG00000167291.16	1.24462	9.91094e-83
ENSG00000262172.1	1.46813	1.38119e-07
ENSG00000279259.1	1.39797	7.89747e-24
ENSG00000275479.1	1.18913	5.17167e-12
ENSG00000280351.2	1.17596	1.1367e-17
ENSG00000141577.14	1.1982	2.00448e-58
ENSG00000262115.1	1.12369	0.00368756
ENSG00000279692.1	1.83395	8.34151e-29
ENSG00000278876.1	1.05814	7.51615e-14
ENSG00000265688.2	1.88751	7.39324e-35
ENSG00000182459.5	4.59616	5.11254e-37
ENSG00000158270.12	1.93943	1.26418e-29
ENSG00000176890.16	1.27253	2.60024e-50
ENSG00000263551.6	2.44837	8.08761e-07
ENSG00000266602.2	2.8566	4.09955e-36
ENSG00000266450.1	2.95561	2.43507e-12
ENSG00000264080.1	3.23832	2.10886e-20
ENSG00000263745.7	4.21422	1.1485e-07
ENSG00000080986.13	2.45287	4.02047e-225
ENSG00000266401.2	6.27556	1.787e-10
ENSG00000279479.1	6.26751	6.62705e-08
ENSG00000088756.12	1.35482	7.85777e-21
ENSG00000265933.5	4.94314	1.75968e-12
ENSG00000141404.16	1.11554	2.62113e-14
ENSG00000267733.5	3.62393	0.00743853
ENSG00000287723.1	1.96336	0.00214836
ENSG00000215512.9	5.57308	9.4851e-08
ENSG00000053747.16	1.54187	2.30408e-45
ENSG00000154040.20	1.67869	1.58502e-25
ENSG00000227279.1	2.72625	0.00476248
ENSG00000134769.21	1.20344	3.30342e-24
ENSG00000267583.5	1.41904	5.12433e-10
ENSG00000285940.2	3.06716	2.39626e-09
ENSG00000267374.2	3.26299	2.30405e-53
ENSG00000267293.1	1.35353	0.00420759
ENSG00000154839.10	4.06915	1.9115e-239
ENSG00000287381.1	4.12165	2.67791e-08
ENSG00000227115.8	5.84545	5.38948e-27
ENSG00000267013.6	2.99523	1.42512e-19
ENSG00000260930.2	4.69499	1.11606e-06
ENSG00000267327.2	2.64391	8.13943e-12
ENSG00000287248.1	3.76419	1.55411e-12
ENSG00000258609.3	3.1417	0.0160582
ENSG00000224367.6	3.35593	1.78508e-16
ENSG00000263711.6	3.84852	2.07256e-13
ENSG00000265717.1	4.80034	7.09256e-11
ENSG00000267015.1	2.94671	0.0107218
ENSG00000267751.5	1.53403	4.15646e-31
ENSG00000267736.2	1.92948	7.48447e-08
ENSG00000115266.11	1.23264	0.000831061
ENSG00000267201.1	3.23406	1.7984e-11
ENSG00000172000.7	2.27325	0.00190641
ENSG00000167670.16	1.14341	6.55681e-77
ENSG00000276043.5	2.95738	1.44259e-155
ENSG00000131142.13	1.5086	4.72272e-11
ENSG00000161888.11	2.62114	1.0662e-143
ENSG00000104889.6	1.57876	4.72614e-12
ENSG00000132026.13	5.35649	4.15462e-11
ENSG00000105613.10	1.02528	5.67639e-15
ENSG00000161860.8	1.92253	1.1119e-33
ENSG00000179284.5	2.97982	1.17204e-11
ENSG00000105011.9	2.60065	7.17489e-155
ENSG00000267147.2	2.76622	0.00502995
ENSG00000074181.9	1.18532	2.46799e-24
ENSG00000130300.9	2.24699	4.20387e-122
ENSG00000130477.15	1.08557	6.78853e-07
ENSG00000105642.15	1.38077	1.31125e-07
ENSG00000273654.1	1.60909	1.62757e-34
ENSG00000105650.22	1.14687	1.07133e-11
ENSG00000223802.7	1.13646	0.00492508
ENSG00000184162.14	1.06523	9.82694e-111
ENSG00000280079.1	1.82482	5.65736e-30
ENSG00000279377.1	1.01788	0.00690878
ENSG00000269345.1	1.85041	3.95095e-06
ENSG00000229676.3	2.10943	5.73433e-18
ENSG00000213973.9	2.91294	1.49989e-30
ENSG00000268696.3	2.52942	0.00807513
ENSG00000267886.1	2.59906	2.78706e-05
ENSG00000183850.14	2.39547	2.5054e-15
ENSG00000196081.9	1.10081	1.78092e-19
ENSG00000269416.6	6.52669	4.80741e-54
ENSG00000196172.9	1.46221	3.14381e-36
ENSG00000267924.1	3.98758	2.8764e-05
ENSG00000269289.6	5.63171	2.4601e-22
ENSG00000269421.1	1.69357	1.28041e-10
ENSG00000266976.3	3.75097	5.98873e-53
ENSG00000267339.7	6.24021	2.91463e-10
ENSG00000267014.6	5.92225	3.93895e-31
ENSG00000105173.14	2.18232	3.90879e-103
ENSG00000186326.4	3.32678	2.71432e-13
ENSG00000173809.18	1.17683	0.000394905
ENSG00000131944.10	1.59439	1.29139e-93
ENSG00000166359.11	1.94462	5.19682e-10
ENSG00000130876.11	1.48874	0.0181099
ENSG00000270212.1	1.63477	6.54712e-06
ENSG00000179066.8	1.77227	3.60505e-20
ENSG00000075702.18	1.74916	3.34103e-70
ENSG00000228629.2	1.1245	0.01359
ENSG00000267260.2	2.29313	3.17025e-16
ENSG00000226686.8	1.87244	7.97173e-19
ENSG00000011332.19	2.32995	0.0123432
ENSG00000179168.15	1.0157	0.00050022
ENSG00000269069.1	1.01322	2.83353e-18
ENSG00000269296.1	1.83791	0.00521166
ENSG00000206674.1	1.55265	3.28428e-08
ENSG00000204978.3	3.15515	0.00393545
ENSG00000268034.1	1.0533	1.97208e-05
ENSG00000079462.7	1.23429	2.04594e-41
ENSG00000188368.9	1.97958	1.28366e-31
ENSG00000167619.13	2.69687	1.17199e-27
ENSG00000241104.5	1.74714	0.00221648
ENSG00000286613.1	1.20153	1.66986e-10
ENSG00000267191.2	1.18691	5.84459e-11
ENSG00000267114.1	1.11161	2.79711e-07
ENSG00000179846.9	1.11479	0.000105653
ENSG00000118156.12	1.04746	5.54232e-11
ENSG00000268583.2	1.56282	5.17938e-17
ENSG00000105467.9	1.81549	1.61298e-10
ENSG00000176920.13	1.92711	3.15424e-14
ENSG00000176909.12	1.2911	1.80336e-28
ENSG00000105552.15	1.06273	4.77008e-34
ENSG00000161609.10	1.79978	0.000175638
ENSG00000267905.5	1.6381	1.64987e-10
ENSG00000105048.17	1.1227	0.000370689
ENSG00000129990.15	2.02429	5.80073e-08
ENSG00000180061.10	1.67489	8.17503e-42
ENSG00000108106.14	1.28441	2.51352e-73
ENSG00000231274.5	1.3936	2.37821e-05
ENSG00000268678.1	1.5458	0.0400684
ENSG00000213013.4	1.1626	5.38043e-12
ENSG00000268201.1	1.17472	1.62879e-15
ENSG00000273901.1	1.30969	1.34842e-16
ENSG00000271303.1	1.12057	4.70814e-07
ENSG00000101278.6	1.7274	1.47099e-09
ENSG00000088882.8	1.03461	2.39288e-09
ENSG00000277287.1	1.35252	1.55965e-07
ENSG00000171864.5	3.07615	4.80746e-22
ENSG00000230563.4	2.79354	0.00554518
ENSG00000125885.13	1.28818	2.51124e-79
ENSG00000275632.1	1.05215	4.40931e-19
ENSG00000278192.1	1.29195	1.78727e-06
ENSG00000229876.1	6.70465	3.44433e-06
ENSG00000229766.7	1.32587	0.00319832
ENSG00000182621.18	1.41508	7.85471e-59
ENSG00000125888.14	3.54877	4.46283e-09
ENSG00000089101.18	2.04531	1.32075e-06
ENSG00000243810.1	9.6641	2.71291e-05
ENSG00000278041.1	3.2436	0.00397495
ENSG00000230400.3	2.89308	0.00245438
ENSG00000170373.8	3.46505	2.83392e-16
ENSG00000100987.14	1.63891	2.8422e-15
ENSG00000286472.1	1.07522	5.8055e-05
ENSG00000100994.12	1.05667	6.91462e-53
ENSG00000101003.10	2.62619	5.32831e-174
ENSG00000227195.11	5.64698	0.000930699
ENSG00000282870.1	3.01455	2.94487e-82
ENSG00000282995.1	2.10047	1.24202e-47
ENSG00000131055.5	1.40123	1.51857e-28
ENSG00000088325.16	1.77329	4.6713e-108
ENSG00000179772.8	1.23453	1.63474e-14
ENSG00000088305.18	1.02958	3.60278e-38
ENSG00000131050.11	5.53065	4.68323e-05
ENSG00000275223.1	2.51068	2.3054e-59
ENSG00000125967.16	1.00721	2.16986e-56
ENSG00000149609.6	1.50129	0.035724
ENSG00000101412.13	2.94188	3.72056e-204
ENSG00000149639.15	1.20448	6.70873e-54
ENSG00000101342.10	3.2831	1.81533e-66
ENSG00000182035.12	2.04733	5.38345e-05
ENSG00000101447.15	2.22957	4.85973e-151
ENSG00000274825.1	1.84039	1.3001e-18
ENSG00000282876.1	1.59529	2.32664e-09
ENSG00000101057.16	3.30575	5.01346e-171
ENSG00000175063.17	3.27919	1.10185e-196
ENSG00000100985.7	1.15339	3.72083e-11
ENSG00000204044.6	1.40148	6.00404e-09
ENSG00000224565.2	1.39597	2.19405e-08
ENSG00000227431.6	1.07408	0.00033658
ENSG00000234948.2	3.21107	4.06724e-36
ENSG00000232294.6	2.54897	0.000767292
ENSG00000087586.17	1.73713	4.19863e-93
ENSG00000236527.1	3.25707	0.0184013
ENSG00000101197.13	1.45166	0.000626782
ENSG00000101210.12	1.16316	8.56593e-08
ENSG00000196421.8	1.06035	1.30651e-13
ENSG00000196132.14	1.15856	8.29672e-08
ENSG00000279579.3	5.7605	3.15246e-15
ENSG00000286033.1	4.00873	4.16603e-12
ENSG00000279720.1	1.40189	1.40712e-08
ENSG00000278932.4	1.2607	4.89364e-22
ENSG00000280081.4	5.6108	9.55189e-15
ENSG00000270533.2	1.65976	0.00476465
ENSG00000277693.2	8.34118	1.15083e-05
ENSG00000187172.15	6.77703	1.2747e-27
ENSG00000154646.9	3.55197	2.34889e-05
ENSG00000224141.6	9.07323	2.48707e-15
ENSG00000226043.2	4.31259	3.99871e-78
ENSG00000232079.7	2.04892	0.00341434
ENSG00000273102.1	2.93389	9.58063e-09
ENSG00000234380.2	1.14847	4.41782e-15
ENSG00000159259.8	1.33182	1.24328e-48
ENSG00000242553.1	2.10124	1.03029e-05
ENSG00000157542.11	2.09546	7.9744e-06
ENSG00000198054.12	5.87528	1.66183e-16
ENSG00000223806.8	3.73636	9.10011e-11
ENSG00000285815.1	1.47066	0.0138623
ENSG00000227698.1	1.05236	1.63088e-05
ENSG00000160207.9	2.15493	8.5091e-40
ENSG00000175894.18	1.34343	0.000124914
ENSG00000287088.1	2.81378	1.77085e-07
ENSG00000233922.3	1.39138	7.7556e-10
ENSG00000160284.15	1.46941	4.55253e-39
ENSG00000215424.10	1.87823	9.43053e-62
ENSG00000228137.1	1.41212	1.00028e-07
ENSG00000160298.17	1.33314	2.03178e-45
ENSG00000283047.1	6.06509	8.73827e-95
ENSG00000283023.1	3.03922	7.19798e-62
ENSG00000225255.6	6.98598	0.00164123
ENSG00000206195.11	3.15295	8.53215e-144
ENSG00000271127.2	7.61244	4.24534e-05
ENSG00000272872.1	2.92007	1.9861e-47
ENSG00000241717.1	2.0569	0.00287881
ENSG00000237689.1	1.49531	0.00120496
ENSG00000269220.1	1.00859	6.32426e-28
ENSG00000235295.1	1.50817	0.00955496
ENSG00000275793.1	1.7216	3.58557e-05
ENSG00000093009.10	3.00317	7.09364e-169
ENSG00000225007.1	2.76267	6.91699e-05
ENSG00000184702.20	1.11137	6.43165e-06
ENSG00000284874.1	1.52719	5.9893e-05
ENSG00000234409.7	1.15279	8.5653e-06
ENSG00000133475.17	2.10602	0.0175144
ENSG00000207751.3	1.35485	2.86231e-07
ENSG00000284630.1	1.14644	2.28387e-06
ENSG00000272954.1	1.27021	6.1545e-08
ENSG00000185686.18	2.3263	3.45611e-05
ENSG00000128266.9	2.07811	1.46724e-42
ENSG00000099953.10	1.45857	1.06302e-28
ENSG00000133454.15	4.14214	2.38034e-45
ENSG00000227201.2	1.2546	9.40909e-07
ENSG00000185133.14	1.12959	1.02608e-12
ENSG00000185666.15	1.58201	6.46853e-28
ENSG00000286592.1	3.99133	5.58802e-05
ENSG00000175329.13	4.36421	1.76547e-55
ENSG00000100297.16	1.24046	9.92742e-102
ENSG00000100302.7	1.81985	1.30824e-31
ENSG00000223695.1	1.50312	1.97966e-10
ENSG00000243902.6	2.32359	5.48375e-05
ENSG00000128298.17	1.38535	7.85024e-29
ENSG00000100206.10	1.24544	1.04942e-12
ENSG00000228274.4	1.22534	1.1286e-27
ENSG00000179750.16	2.05138	7.34719e-42
ENSG00000100311.17	1.02396	2.58368e-31
ENSG00000128268.12	1.10494	2.82441e-14
ENSG00000100162.15	2.69138	1.15519e-123
ENSG00000205704.7	4.70098	5.53516e-13
ENSG00000100167.20	1.49704	1.38792e-18
ENSG00000077935.17	3.08573	1.89891e-26
ENSG00000128408.9	2.0055	7.51163e-26
ENSG00000277232.2	1.20061	5.61075e-07
ENSG00000075218.19	2.95195	3.08986e-167
ENSG00000234869.1	1.81001	5.08699e-10
ENSG00000224271.7	5.75311	3.15097e-73
ENSG00000279712.1	5.39466	3.39015e-05
ENSG00000128165.9	1.47559	2.29879e-32
ENSG00000100253.13	1.58359	2.65162e-12
ENSG00000008735.14	2.17278	2.00245e-60
ENSG00000169059.12	2.01419	2.64863e-11
ENSG00000182583.12	3.96697	7.81758e-18
ENSG00000287171.1	1.30279	0.00442869
ENSG00000234129.8	1.65564	3.31267e-29
ENSG00000187268.12	2.12915	0.0180064
ENSG00000235385.2	2.63775	0.000502841
ENSG00000231066.3	1.46626	0.00289066
ENSG00000181544.15	2.02905	1.25697e-78
ENSG00000126010.6	4.18216	1.01951e-69
ENSG00000182798.10	5.07922	6.3735e-42
ENSG00000102098.19	1.16547	7.88513e-36
ENSG00000283400.1	5.06423	0.00502231
ENSG00000283380.1	1.97795	8.42259e-06
ENSG00000091482.8	1.93889	5.63129e-25
ENSG00000102174.9	1.55709	2.8355e-18
ENSG00000184735.7	7.25108	3.85197e-24
ENSG00000242021.2	3.953	6.5197e-33
ENSG00000228933.8	4.61048	1.88112e-76
ENSG00000224960.5	6.75055	1.89051e-60
ENSG00000189186.10	6.31947	9.40657e-39
ENSG00000226372.4	4.22915	0.00641097
ENSG00000169306.10	1.43092	3.20771e-05
ENSG00000099399.6	5.50926	5.3874e-08
ENSG00000214107.8	8.54075	0.00376455
ENSG00000231542.1	5.02697	6.76084e-06
ENSG00000233928.6	4.62844	7.75902e-06
ENSG00000287729.1	1.13455	2.6912e-05
ENSG00000238123.1	1.14545	0.00021084
ENSG00000235304.2	1.9373	0.0474433
ENSG00000147113.17	1.7352	2.8972e-71
ENSG00000231566.2	1.21463	2.59357e-05
ENSG00000236751.2	1.64877	1.12602e-25
ENSG00000126752.7	4.7205	3.3675e-57
ENSG00000101951.17	2.38431	1.17481e-20
ENSG00000279750.3	4.92478	0.00899096
ENSG00000171405.12	5.11122	0.00037199
ENSG00000234068.7	1.18888	0.000198052
ENSG00000232765.6	7.26418	6.00709e-08
ENSG00000186912.6	1.27765	6.36967e-05
ENSG00000090889.12	3.54307	1.19011e-266
ENSG00000120498.13	2.89175	3.85502e-27
ENSG00000243468.5	1.98578	0.0100651
[truncated: 58 more rows]

## Sheet: S3
Supplementary Table S3. List of down-regulated genes in the tumour samples compared to the adjacent normal samples from all-patients analysis
Ensembl ID	log2FoldChange	padj
ENSG00000225972.1	-1.9778	3.36692e-44
ENSG00000225630.1	-2.09519	4.1747e-77
ENSG00000237973.1	-1.67776	3.69376e-57
ENSG00000229344.1	-1.49866	6.55947e-37
ENSG00000240409.1	-1.47252	4.7636e-26
ENSG00000248527.1	-2.20005	1.88266e-94
ENSG00000198744.5	-1.7275	9.63905e-46
ENSG00000230699.2	-2.74758	1.50703e-08
ENSG00000223764.2	-4.54334	5.56744e-108
ENSG00000187634.12	-3.98414	7.56472e-101
ENSG00000187642.9	-1.06367	0.00044403
ENSG00000272141.1	-3.25632	7.15612e-39
ENSG00000162572.21	-1.00844	7.55484e-26
ENSG00000162576.16	-1.50724	5.6181e-23
ENSG00000215915.10	-2.51254	2.63623e-84
ENSG00000189409.14	-1.44611	7.16651e-10
ENSG00000215914.4	-1.38658	1.26869e-05
ENSG00000169885.10	-1.21928	2.86999e-18
ENSG00000178821.13	-1.42735	4.82026e-36
ENSG00000142609.18	-3.80201	4.75732e-107
ENSG00000234396.3	-1.85366	2.73801e-21
ENSG00000177133.11	-2.11991	3.74902e-23
ENSG00000142611.17	-1.15763	2.73306e-12
ENSG00000162591.16	-1.2555	4.20323e-20
ENSG00000235169.8	-1.61732	1.36702e-48
ENSG00000196581.11	-2.87649	1.65348e-49
ENSG00000131697.18	-1.1978	6.23747e-27
ENSG00000069424.15	-1.01561	4.45502e-20
ENSG00000284716.1	-2.54719	5.1095e-50
ENSG00000116285.13	-1.47092	1.57637e-91
ENSG00000238290.1	-1.44685	3.17466e-40
ENSG00000227634.3	-2.3818	2.03071e-64
ENSG00000221083.1	-1.24415	4.77246e-06
ENSG00000171608.16	-1.0308	8.52312e-27
ENSG00000199562.1	-1.45989	1.92013e-10
ENSG00000215785.2	-1.16953	4.67493e-05
ENSG00000009724.17	-2.26815	9.989e-64
ENSG00000229484.1	-1.16396	3.19829e-30
ENSG00000120952.4	-1.78616	7.3593e-07
ENSG00000237700.2	-1.6856	1.29283e-10
ENSG00000189337.17	-2.89327	5.10118e-130
ENSG00000272510.1	-1.55723	2.37688e-55
ENSG00000162461.8	-1.10407	2.7595e-25
ENSG00000162460.7	-3.06404	2.67559e-107
ENSG00000173641.17	-1.88567	7.03305e-22
ENSG00000142627.13	-2.18796	2.07505e-120
ENSG00000227959.1	-1.2201	8.09667e-16
ENSG00000224621.1	-1.02687	1.00911e-07
ENSG00000233929.1	-2.23895	3.35472e-24
ENSG00000186301.8	-1.17769	7.76214e-36
ENSG00000280114.1	-1.15217	1.28174e-16
ENSG00000268869.6	-1.29213	1.25155e-25
ENSG00000186715.11	-1.18922	7.00499e-40
ENSG00000159423.17	-1.13856	9.68727e-50
ENSG00000286064.1	-1.31664	8.16067e-29
ENSG00000211454.14	-1.9554	4.13906e-89
ENSG00000162482.5	-3.18511	1.11603e-127
ENSG00000270728.1	-1.14833	1.70426e-15
ENSG00000188257.11	-2.29086	1.61885e-29
ENSG00000127472.11	-1.95112	1.1637e-56
ENSG00000162543.6	-1.39715	4.75891e-29
ENSG00000284743.1	-1.56596	8.45419e-36
ENSG00000183114.8	-2.48606	1.61891e-36
ENSG00000158825.6	-2.18064	9.88351e-77
ENSG00000158828.8	-1.01558	1.0144e-72
ENSG00000162551.14	-2.61387	9.57193e-97
ENSG00000162552.15	-1.87068	1.2265e-24
ENSG00000173372.17	-1.12624	7.78748e-29
ENSG00000173369.16	-1.07018	1.68533e-25
ENSG00000117318.9	-1.32122	2.79073e-30
ENSG00000117305.15	-1.35376	1.46904e-131
ENSG00000188822.8	-1.44681	6.80216e-16
ENSG00000264443.1	-1.30013	3.0527e-18
ENSG00000184454.7	-1.03309	7.53457e-17
ENSG00000227312.2	-1.41448	0.000323074
ENSG00000020633.18	-1.2268	8.96324e-32
ENSG00000117643.14	-2.24423	7.87707e-127
ENSG00000142675.18	-3.39713	8.54907e-100
ENSG00000236155.6	-1.13648	1.13778e-20
ENSG00000131910.5	-1.87776	4.658e-82
ENSG00000175707.9	-1.21607	5.95408e-27
ENSG00000142748.12	-6.10176	1.18811e-294
ENSG00000000938.13	-1.44212	4.37868e-44
ENSG00000229820.2	-1.40256	3.6212e-06
ENSG00000084636.18	-1.01922	2.75118e-11
ENSG00000203620.2	-1.70829	1.61108e-19
ENSG00000183615.6	-1.29933	1.23047e-37
ENSG00000160097.18	-3.0923	4.42329e-71
ENSG00000225313.5	-1.51291	1.12822e-07
ENSG00000284154.1	-1.2167	5.32886e-13
ENSG00000222112.1	-1.01202	1.35361e-16
ENSG00000188910.8	-4.08214	2.54854e-60
ENSG00000092850.12	-2.15214	1.05485e-26
ENSG00000171812.13	-1.48305	1.90959e-21
ENSG00000119535.17	-1.87985	5.49186e-54
ENSG00000163879.11	-1.37338	7.02265e-37
ENSG00000224592.5	-1.6035	2.78071e-05
ENSG00000243970.3	-1.52686	1.51784e-51
ENSG00000116983.13	-1.3228	6.94664e-09
ENSG00000198754.5	-1.0015	3.23171e-08
ENSG00000168389.17	-4.81638	5.2457e-179
ENSG00000228477.1	-3.27778	1.28745e-88
ENSG00000227278.1	-1.1304	5.54471e-06
ENSG00000238186.1	-1.059	4.16154e-05
ENSG00000281207.1	-1.36611	7.94464e-38
ENSG00000127129.10	-3.60225	1.07518e-65
ENSG00000044012.4	-2.37446	9.79783e-39
ENSG00000066185.13	-1.37666	3.83706e-47
ENSG00000179178.11	-4.86137	3.32557e-95
ENSG00000253313.6	-1.68243	1.53351e-35
ENSG00000198520.12	-1.80302	3.69131e-75
ENSG00000200169.1	-1.06399	2.41058e-08
ENSG00000173846.13	-1.13239	1.04255e-33
ENSG00000222009.8	-1.03377	4.86476e-38
ENSG00000226499.1	-1.45566	2.06031e-10
ENSG00000117480.16	-1.19589	8.90309e-54
ENSG00000187048.13	-3.00631	9.71169e-150
ENSG00000186377.8	-1.00277	1.2855e-28
ENSG00000186160.5	-1.84529	9.75389e-31
ENSG00000162365.12	-3.23469	1.63776e-142
ENSG00000162367.11	-1.49232	4.22655e-38
ENSG00000269113.4	-1.62857	3.9089e-35
ENSG00000242267.6	-1.0571	0.000117444
ENSG00000272491.1	-1.03861	7.99612e-10
ENSG00000186094.17	-2.74443	1.26138e-60
ENSG00000237337.1	-3.26833	2.59631e-50
ENSG00000227070.1	-1.25076	8.3053e-49
ENSG00000203995.10	-1.5277	1.10972e-23
ENSG00000121310.17	-1.53128	5.03501e-83
ENSG00000116171.18	-1.20999	1.56766e-63
ENSG00000174348.14	-3.05105	1.0202e-64
ENSG00000162383.12	-1.4988	8.44296e-15
ENSG00000157184.7	-1.05349	1.13043e-71
ENSG00000230138.2	-1.10158	1.19749e-06
ENSG00000174332.5	-2.4851	1.1378e-11
ENSG00000211452.10	-1.19804	6.91909e-20
ENSG00000162390.17	-1.57075	3.93684e-32
ENSG00000162391.12	-4.48309	7.66764e-122
ENSG00000184313.20	-2.09056	3.41864e-41
ENSG00000233203.6	-1.03561	4.68737e-15
ENSG00000234810.4	-3.25009	4.33709e-51
ENSG00000223956.3	-2.77104	6.5777e-129
ENSG00000162407.9	-1.33443	1.22178e-99
ENSG00000187889.13	-1.68612	3.51492e-80
ENSG00000157131.11	-2.26324	1.76944e-119
ENSG00000021852.13	-1.98413	6.14919e-101
ENSG00000236341.1	-1.97672	2.37305e-95
ENSG00000173406.15	-1.81998	1.18399e-37
ENSG00000229887.4	-1.55251	0.000515074
ENSG00000184292.7	-4.44892	2.07153e-135
ENSG00000177606.7	-1.21755	1.55502e-58
ENSG00000134716.11	-1.47197	1.0273e-79
ENSG00000242860.3	-1.98833	3.70846e-14
ENSG00000132854.19	-4.6069	3.0789e-96
ENSG00000132855.5	-1.41912	1.61907e-49
ENSG00000079739.17	-1.05066	2.93225e-61
ENSG00000244256.3	-1.3141	2.10723e-36
ENSG00000116678.19	-1.71654	2.83385e-38
ENSG00000152760.10	-3.0273	2.362e-114
ENSG00000235200.3	-3.25203	1.40477e-111
ENSG00000116717.13	-1.29273	3.40658e-70
ENSG00000232284.7	-1.39757	7.55638e-47
ENSG00000162595.7	-3.67083	6.75373e-133
ENSG00000234383.1	-1.02706	0.000267518
ENSG00000033122.20	-2.2691	1.01742e-29
ENSG00000116761.12	-2.40692	6.81755e-100
ENSG00000278636.1	-1.6032	4.68321e-05
ENSG00000271992.1	-2.47805	6.51543e-103
ENSG00000172260.15	-2.46082	2.78595e-36
ENSG00000116783.15	-1.11989	6.07264e-05
ENSG00000178965.14	-1.21729	8.33594e-18
ENSG00000117054.13	-1.07357	5.70316e-47
ENSG00000154027.19	-1.14046	7.0722e-07
ENSG00000235613.2	-1.48804	5.72066e-15
ENSG00000162614.18	-1.11664	7.84134e-24
ENSG00000137960.6	-1.30674	5.33121e-36
ENSG00000273338.1	-1.4586	4.66153e-28
ENSG00000237413.5	-1.77272	1.71403e-72
ENSG00000137959.16	-1.20451	2.38349e-30
ENSG00000234184.6	-1.15229	9.52196e-08
ENSG00000215875.4	-2.45862	3.94197e-06
ENSG00000233008.6	-1.11477	2.29533e-40
ENSG00000237076.1	-4.31587	3.85158e-66
ENSG00000285201.1	-1.64715	8.26727e-12
ENSG00000284882.1	-1.07303	1.04329e-26
ENSG00000153898.13	-1.14281	1.4982e-18
ENSG00000055732.13	-1.33865	5.80362e-11
ENSG00000280099.1	-1.22912	2.41533e-44
ENSG00000097096.9	-1.00972	9.90775e-32
ENSG00000273264.1	-1.09621	4.90915e-15
ENSG00000142871.17	-1.66169	1.7482e-42
ENSG00000213512.3	-2.1693	4.19819e-67
ENSG00000069702.11	-1.30756	1.20547e-54
ENSG00000229992.1	-1.48688	1.24693e-14
ENSG00000224093.5	-1.08175	3.067e-27
ENSG00000117525.14	-2.01384	9.96367e-49
ENSG00000152078.10	-1.2501	1.85534e-56
ENSG00000231992.1	-1.35013	2.04118e-31
ENSG00000232542.1	-1.20914	1.76452e-07
ENSG00000162688.17	-1.23612	5.36218e-76
ENSG00000285530.1	-1.24549	2.65524e-05
ENSG00000240038.6	-1.03015	6.87035e-30
ENSG00000213366.13	-1.35754	4.01538e-52
ENSG00000134201.12	-3.17629	6.37425e-68
ENSG00000168679.18	-2.486	2.82864e-88
ENSG00000259834.1	-1.23133	2.74056e-22
ENSG00000177272.9	-1.19867	6.28535e-17
ENSG00000085465.13	-1.16446	1.09599e-32
ENSG00000143110.11	-1.42764	1.46202e-53
ENSG00000121933.19	-2.33504	1.46622e-81
ENSG00000171385.9	-4.1647	2.98907e-119
ENSG00000231437.3	-3.28334	4.66634e-74
ENSG00000231246.2	-1.95214	2.86856e-35
ENSG00000224167.2	-1.10417	1.6805e-13
ENSG00000287807.1	-3.04249	2.32549e-45
ENSG00000238198.2	-1.57625	2.78172e-43
ENSG00000116774.12	-2.97851	3.76598e-106
ENSG00000116748.21	-3.23041	4.16237e-41
ENSG00000134198.10	-1.17901	1.1074e-15
ENSG00000134259.4	-1.57731	7.85185e-36
ENSG00000134258.17	-4.08643	1.86276e-73
ENSG00000092607.15	-2.42776	2.73195e-73
ENSG00000224238.2	-3.43508	2.891e-62
ENSG00000227712.2	-1.62516	1.53639e-49
ENSG00000194297.2	-3.45208	1.85908e-58
ENSG00000116882.14	-4.5655	1.26086e-164
ENSG00000230921.1	-5.40387	3.05914e-129
ENSG00000203859.10	-2.22387	3.39905e-50
ENSG00000232780.2	-1.52304	3.34301e-13
ENSG00000203858.3	-1.48095	1.42583e-06
ENSG00000203857.10	-1.06783	3.70072e-07
ENSG00000092621.12	-2.14028	1.16901e-80
ENSG00000134240.12	-1.73399	2.14352e-78
ENSG00000270392.2	-1.93359	4.33387e-32
ENSG00000287979.1	-1.43698	7.16016e-08
ENSG00000277610.1	-1.56736	5.56721e-14
ENSG00000228826.3	-1.49253	2.81611e-54
ENSG00000232721.2	-1.23356	3.49551e-16
ENSG00000273213.3	-1.33877	1.5042e-15
ENSG00000207205.1	-1.5595	3.39433e-10
ENSG00000277918.1	-1.2669	1.7661e-05
ENSG00000276216.1	-1.30308	6.72179e-09
ENSG00000234367.1	-4.46259	3.69587e-27
ENSG00000270722.1	-1.22675	2.78422e-06
ENSG00000117281.16	-2.27002	1.1614e-75
ENSG00000198483.13	-1.00644	5.36086e-12
ENSG00000274428.1	-1.68775	8.44346e-13
ENSG00000227242.4	-2.82069	1.1488e-94
ENSG00000283342.1	-2.08939	1.50916e-49
ENSG00000131781.13	-1.01688	1.47419e-33
ENSG00000229828.2	-1.71513	2.93997e-07
ENSG00000215861.6	-1.68597	1.69724e-48
ENSG00000118298.12	-2.24134	6.71703e-45
ENSG00000143369.15	-3.89515	5.85358e-260
ENSG00000237781.3	-1.12601	1.92714e-21
ENSG00000277452.1	-1.45587	2.81995e-11
ENSG00000274963.1	-1.31136	1.41682e-10
ENSG00000163154.6	-1.01746	1.01334e-24
ENSG00000159450.12	-2.38676	9.91351e-61
ENSG00000237975.7	-1.19623	4.24652e-16
ENSG00000187223.4	-2.4871	2.802e-07
ENSG00000163220.11	-1.57453	1.09783e-28
ENSG00000163221.9	-3.03193	2.4715e-77
ENSG00000143546.10	-2.67913	1.68569e-87
ENSG00000189334.9	-1.39584	6.23367e-24
ENSG00000231416.1	-1.07042	5.18297e-06
ENSG00000163239.12	-1.05993	8.21523e-20
ENSG00000185499.16	-1.32616	1.64053e-14
ENSG00000132677.13	-2.06319	3.20033e-26
ENSG00000187862.12	-1.17529	1.00723e-10
ENSG00000027869.11	-1.29164	1.83109e-30
ENSG00000187800.13	-1.08932	1.37642e-24
ENSG00000229961.3	-1.89239	4.8826e-14
ENSG00000271736.2	-1.10667	1.91297e-07
ENSG00000143297.19	-2.148	6.75894e-26
ENSG00000160856.21	-1.39486	4.68218e-21
ENSG00000132704.16	-1.63263	1.40224e-15
ENSG00000163534.15	-1.38098	1.28218e-13
ENSG00000073754.6	-4.27916	3.15826e-112
ENSG00000158473.7	-2.48834	8.40907e-119
ENSG00000158481.13	-1.33369	3.17909e-26
ENSG00000163563.8	-1.23168	1.46361e-28
ENSG00000163564.15	-1.10921	4.48168e-21
ENSG00000163568.15	-1.13421	2.7287e-15
ENSG00000162706.13	-2.38593	3.56846e-25
ENSG00000179639.10	-1.55463	4.46988e-24
ENSG00000231100.1	-1.96278	1.44085e-51
ENSG00000132703.4	-1.97687	7.39883e-57
ENSG00000158731.2	-1.95687	3.53428e-41
ENSG00000223603.1	-3.61885	4.15595e-21
ENSG00000132693.12	-3.12021	1.93736e-53
ENSG00000181036.14	-1.5691	3.15981e-40
ENSG00000085552.17	-2.19425	2.35913e-51
ENSG00000177807.10	-2.78474	4.69381e-72
ENSG00000227741.1	-1.38178	5.87032e-25
ENSG00000258465.8	-1.15388	4.12031e-12
ENSG00000162738.6	-1.57534	8.05846e-24
ENSG00000162739.14	-1.05575	1.62646e-19
ENSG00000026751.17	-1.11757	6.88644e-21
ENSG00000122224.18	-1.08356	3.64195e-18
ENSG00000122223.13	-2.06849	1.07191e-65
ENSG00000179914.5	-5.43806	1.78651e-135
ENSG00000143257.11	-2.0514	3.19492e-51
ENSG00000203747.11	-1.26639	6.94072e-35
ENSG00000162747.11	-2.55057	1.50822e-58
ENSG00000072694.21	-2.67943	2.31737e-73
ENSG00000226889.3	-1.0054	5.49554e-14
ENSG00000207729.3	-1.11817	0.000103176
ENSG00000171722.13	-3.4545	3.57781e-17
ENSG00000198574.6	-1.37819	2.35429e-27
ENSG00000272574.1	-2.17805	3.39456e-79
ENSG00000117152.13	-1.52287	2.26452e-25
ENSG00000185630.18	-2.00202	1.10086e-59
ENSG00000269887.1	-2.49339	3.81664e-45
ENSG00000162761.14	-1.22676	2.40657e-07
ENSG00000143167.12	-1.11665	1.60317e-07
ENSG00000198821.10	-1.03817	7.19575e-26
ENSG00000233411.1	-2.69734	3.28239e-16
ENSG00000143199.18	-1.27321	1.31804e-34
ENSG00000224837.1	-1.12582	1.59096e-32
ENSG00000143185.4	-1.15724	1.42149e-20
ENSG00000143196.5	-5.45085	8.09208e-124
ENSG00000117477.12	-1.07423	3.99766e-09
ENSG00000174175.17	-2.73179	1.33236e-75
ENSG00000007908.16	-2.26278	1.05663e-46
ENSG00000007933.13	-1.67745	1.90239e-56
ENSG00000094963.14	-2.28444	3.69232e-53
ENSG00000076258.10	-1.02408	2.22973e-37
ENSG00000230630.5	-2.76524	2.23184e-72
ENSG00000117601.13	-1.48097	9.85135e-36
ENSG00000224977.1	-1.02471	8.39338e-08
ENSG00000120332.16	-1.88854	9.74767e-44
ENSG00000116147.17	-3.13902	3.0322e-48
ENSG00000152092.16	-1.24167	2.48547e-13
ENSG00000198797.7	-2.91303	7.9011e-40
ENSG00000224968.2	-1.36937	1.92482e-14
ENSG00000116194.13	-3.24075	1.24649e-123
ENSG00000143340.6	-1.64674	6.85818e-16
ENSG00000116260.17	-1.92328	3.95133e-65
ENSG00000135824.12	-1.20903	5.8117e-05
ENSG00000058085.15	-2.24932	3.80366e-39
ENSG00000230470.1	-1.18078	0.000232137
ENSG00000285847.2	-2.56222	4.31062e-48
ENSG00000116690.12	-2.2528	2.45e-58
ENSG00000073756.12	-2.44857	4.55973e-51
ENSG00000273129.1	-1.72541	5.98282e-10
ENSG00000116711.10	-1.29328	7.86855e-26
ENSG00000150681.10	-1.28235	4.78075e-36
ENSG00000116741.8	-1.01341	5.24515e-19
ENSG00000162630.6	-1.27395	7.25323e-16
ENSG00000116785.13	-3.67044	1.4758e-133
ENSG00000244414.6	-1.2263	5.26371e-33
ENSG00000134365.13	-2.31745	1.18347e-62
ENSG00000080910.13	-1.35365	3.8528e-35
ENSG00000134389.10	-1.10623	4.64329e-15
ENSG00000143278.4	-1.013	1.28549e-22
ENSG00000252860.1	-1.17569	5.12854e-07
ENSG00000163395.17	-1.99292	8.77683e-19
ENSG00000282221.1	-1.41589	1.27377e-26
ENSG00000174307.7	-1.37898	8.89683e-26
ENSG00000133067.17	-2.16349	3.41912e-46
ENSG00000226862.1	-1.12558	2.99018e-11
ENSG00000133048.13	-2.19067	7.03219e-31
ENSG00000122176.12	-1.77476	5.01707e-32
ENSG00000188783.6	-2.78093	1.50561e-53
ENSG00000221643.1	-1.17957	2.705e-11
ENSG00000143845.15	-1.23641	4.23133e-28
ENSG00000225522.2	-1.06386	5.6145e-05
ENSG00000163531.15	-1.3008	2.20935e-24
ENSG00000158715.6	-1.34976	1.57536e-54
ENSG00000286619.1	-1.23631	5.41035e-10
ENSG00000162877.13	-1.23207	4.11276e-15
ENSG00000285417.1	-1.09334	1.10399e-11
ENSG00000263961.8	-1.05101	2.30618e-11
ENSG00000136634.7	-2.08851	1.46439e-49
ENSG00000162896.6	-1.24042	1.47271e-16
ENSG00000162897.16	-1.66084	4.23575e-21
ENSG00000182795.13	-2.17723	3.01546e-38
ENSG00000123843.13	-1.04363	1.87696e-44
ENSG00000123838.11	-1.54444	8.90562e-40
ENSG00000117322.17	-1.07014	2.40812e-06
ENSG00000203710.11	-1.72066	2.32848e-37
ENSG00000197721.17	-2.02247	2.00049e-25
ENSG00000203709.12	-1.29811	3.95028e-41
ENSG00000123689.6	-1.80246	3.52023e-49
ENSG00000117594.10	-3.14736	7.81121e-81
ENSG00000236136.1	-1.98497	1.29668e-42
ENSG00000143473.13	-1.15844	0.000133394
ENSG00000226251.6	-1.12391	7.66136e-17
ENSG00000162772.17	-1.54645	1.94812e-50
ENSG00000281664.1	-1.26628	8.36229e-22
ENSG00000274895.1	-1.03334	5.03867e-23
ENSG00000082482.13	-1.4709	1.91374e-07
ENSG00000042781.14	-1.95666	4.40207e-53
ENSG00000196482.18	-3.80547	5.14401e-108
ENSG00000117791.16	-1.24299	9.31363e-59
ENSG00000186205.13	-1.51609	2.47256e-67
ENSG00000136630.13	-1.07874	6.26474e-32
ENSG00000286398.1	-6.52424	6.14287e-195
ENSG00000143507.18	-1.19898	1.93617e-59
ENSG00000226601.1	-1.06506	4.56671e-05
ENSG00000143502.15	-1.36679	5.44378e-15
ENSG00000232628.6	-1.5788	1.41892e-28
ENSG00000243709.1	-1.02425	2.41624e-09
ENSG00000143768.13	-1.03035	0.000197357
ENSG00000185155.11	-1.05866	1.49809e-05
ENSG00000228382.1	-1.15355	2.5873e-07
ENSG00000143816.8	-2.64656	3.23929e-45
ENSG00000198835.4	-1.34783	1.54777e-19
ENSG00000162913.10	-1.56164	5.42929e-17
ENSG00000154358.21	-1.30558	6.10748e-21
ENSG00000287315.1	-1.08426	6.33652e-06
ENSG00000201321.1	-2.62042	1.24341e-20
ENSG00000229228.1	-2.01793	1.04429e-06
ENSG00000231768.2	-1.71145	9.9299e-33
ENSG00000286210.1	-2.15727	8.93551e-20
ENSG00000230628.1	-2.20437	5.26202e-45
ENSG00000282097.1	-1.98885	7.1914e-33
ENSG00000280587.1	-2.63806	4.49375e-107
ENSG00000206803.1	-1.50958	4.9219e-13
ENSG00000180875.5	-4.07236	6.9602e-107
ENSG00000231440.1	-4.19944	3.11137e-30
ENSG00000287738.1	-1.41083	4.71159e-11
ENSG00000117009.12	-2.88319	1.52461e-134
ENSG00000162843.17	-1.38544	4.88649e-21
ENSG00000180287.17	-1.63831	2.74276e-15
ENSG00000253326.2	-1.04944	0.000172009
ENSG00000237759.1	-2.66601	3.14324e-19
ENSG00000162711.17	-1.11987	1.12449e-20
ENSG00000162722.9	-1.6063	5.15174e-24
ENSG00000184731.6	-2.0249	6.05938e-53
ENSG00000035115.22	-1.61928	1.17091e-104
ENSG00000189292.16	-4.46829	8.13696e-100
ENSG00000228643.1	-1.13438	3.20504e-07
ENSG00000186487.19	-4.16788	2.49517e-49
ENSG00000182551.14	-1.30946	2.11976e-65
ENSG00000118004.18	-2.99982	3.01044e-106
ENSG00000151360.10	-4.16834	9.3086e-130
ENSG00000205837.7	-1.9969	7.90087e-26
ENSG00000235576.1	-1.10425	2.42408e-20
ENSG00000229740.3	-2.38511	1.13081e-114
ENSG00000236008.3	-3.08521	2.36764e-80
ENSG00000231083.1	-1.90892	4.10426e-25
ENSG00000235092.6	-1.28449	2.96602e-60
ENSG00000115738.10	-1.57693	2.40481e-118
ENSG00000143797.12	-1.60327	2.81581e-42
ENSG00000134317.18	-1.22876	1.0483e-55
ENSG00000188525.4	-2.46272	6.77281e-29
ENSG00000260476.1	-1.26161	0.000756033
ENSG00000172059.11	-1.02382	6.38726e-75
ENSG00000205795.4	-4.70842	2.47812e-115
ENSG00000145063.15	-1.27307	0.00319727
ENSG00000224177.7	-1.23281	1.05204e-14
ENSG00000170745.12	-2.12614	1.43936e-52
ENSG00000143878.10	-1.18744	2.6379e-56
ENSG00000269976.1	-1.4453	2.12734e-36
ENSG00000231948.2	-1.32171	5.1803e-32
ENSG00000143869.7	-1.69326	1.63088e-49
ENSG00000261012.2	-1.85579	1.17965e-66
ENSG00000287956.1	-3.26795	1.90051e-115
ENSG00000218819.5	-2.19859	2.82341e-51
ENSG00000233005.2	-1.65384	1.54119e-21
ENSG00000231204.7	-2.26827	4.05191e-18
ENSG00000232451.2	-2.30662	2.03751e-79
ENSG00000186453.13	-1.49515	1.6937e-14
ENSG00000242628.6	-1.61431	1.25744e-12
ENSG00000224220.1	-1.05964	2.93183e-07
ENSG00000171303.7	-2.49332	2.77687e-41
ENSG00000138080.14	-2.10649	5.38288e-54
ENSG00000138030.13	-1.46622	3.51466e-65
ENSG00000143994.14	-1.07123	1.98732e-17
ENSG00000157992.12	-2.79877	1.52502e-128
ENSG00000115226.10	-1.4388	4.14955e-52
ENSG00000084734.9	-1.64282	9.24406e-67
ENSG00000221843.4	-1.17121	8.99397e-21
ENSG00000162949.16	-1.93815	5.5564e-12
ENSG00000158089.15	-2.0279	2.75145e-57
ENSG00000013016.16	-2.37769	1.32032e-116
ENSG00000158125.10	-2.20449	5.78935e-78
ENSG00000277893.2	-4.14658	2.78653e-175
ENSG00000091106.19	-1.29145	4.22462e-30
ENSG00000049323.16	-1.11134	2.53251e-26
ENSG00000228262.10	-3.23679	4.99508e-78
ENSG00000287316.1	-3.3592	7.14436e-63
ENSG00000236213.2	-1.43314	2.06328e-29
ENSG00000115841.20	-1.24588	2.0744e-85
ENSG00000269210.2	-1.08915	2.73239e-06
ENSG00000152154.11	-1.37569	2.33798e-36
ENSG00000183023.18	-1.12014	8.02003e-33
ENSG00000287255.1	-1.52716	5.31761e-27
ENSG00000162881.6	-1.30143	6.51462e-39
ENSG00000162882.15	-1.71178	4.08684e-85
ENSG00000224739.2	-2.20829	9.9419e-31
ENSG00000231826.6	-1.08576	3.3203e-06
ENSG00000207087.1	-1.07245	0.00116447
ENSG00000230587.2	-1.88476	1.80082e-59
ENSG00000152527.14	-2.11983	2.26735e-47
ENSG00000138075.14	-1.05968	6.50052e-32
ENSG00000138079.14	-3.25414	7.28597e-71
ENSG00000119888.11	-3.87245	1.85088e-86
ENSG00000179915.23	-4.93115	1.19963e-54
ENSG00000237887.1	-1.15703	1.721e-06
ENSG00000233723.9	-1.79283	5.92258e-09
ENSG00000206937.1	-1.40646	0.000429429
ENSG00000229839.6	-1.10514	1.20777e-05
ENSG00000226622.6	-4.09085	6.08654e-118
ENSG00000169764.15	-1.12079	2.62365e-43
ENSG00000230749.5	-2.18346	1.61757e-20
ENSG00000163217.2	-7.79489	4.26949e-170
ENSG00000163235.16	-2.09385	1.99315e-73
ENSG00000152672.8	-1.87201	5.30502e-38
ENSG00000116031.9	-2.02438	7.59059e-29
ENSG00000144031.12	-1.2116	1.54183e-17
ENSG00000124374.9	-1.64335	1.00963e-55
ENSG00000281195.1	-1.01107	7.61772e-22
ENSG00000144035.4	-1.56264	5.00416e-47
ENSG00000163016.10	-1.11588	3.1768e-39
ENSG00000115363.14	-1.37056	1.68311e-52
ENSG00000176204.13	-2.47966	8.67312e-31
ENSG00000162951.11	-3.33679	6.10642e-23
ENSG00000115423.19	-1.7936	2.35195e-42
ENSG00000259056.1	-1.34639	7.44701e-06
ENSG00000115523.16	-1.28338	9.19516e-30
ENSG00000168874.13	-3.2469	8.37501e-130
ENSG00000229498.1	-2.0288	3.88425e-16
ENSG00000208772.1	-1.13159	5.58497e-15
ENSG00000068615.18	-1.31556	2.2352e-17
ENSG00000153563.15	-1.24066	6.49674e-26
ENSG00000183281.14	-2.37111	6.40565e-112
ENSG00000233999.3	-1.44528	2.76732e-07
ENSG00000284879.1	-2.28172	3.036e-99
ENSG00000125551.19	-2.74104	2.19674e-102
ENSG00000229604.2	-1.51961	1.57113e-18
ENSG00000222724.1	-1.25704	4.2716e-05
ENSG00000163586.10	-2.02192	1.12714e-52
ENSG00000230006.7	-2.2596	7.97821e-27
ENSG00000211592.8	-2.47236	1.23325e-36
ENSG00000211593.2	-1.76194	6.34432e-13
ENSG00000211594.2	-2.08383	3.32479e-17
ENSG00000211595.2	-1.57755	6.16239e-09
ENSG00000211597.2	-1.38746	1.36885e-09
ENSG00000211598.2	-2.28526	1.36263e-27
ENSG00000211599.2	-2.14898	1.22107e-15
ENSG00000243466.1	-2.14558	2.04889e-24
ENSG00000239855.1	-2.75018	2.07589e-39
ENSG00000241755.1	-2.55829	2.63129e-37
ENSG00000241351.3	-2.24496	3.09841e-27
ENSG00000243290.3	-2.45051	8.77288e-31
ENSG00000253497.1	-2.46489	1.80874e-12
ENSG00000244437.1	-1.92758	1.07101e-20
ENSG00000240864.3	-2.18705	1.37092e-25
ENSG00000240382.3	-2.31085	2.45818e-28
ENSG00000239951.1	-2.11696	1.81248e-25
ENSG00000211611.2	-2.91651	4.23884e-30
ENSG00000241294.1	-2.66246	1.31804e-34
ENSG00000254098.1	-1.39439	0.000270357
ENSG00000244575.3	-2.34297	3.55219e-28
ENSG00000244116.3	-2.56399	1.83561e-30
ENSG00000253998.3	-2.35605	1.64787e-27
ENSG00000243238.1	-2.68943	1.71638e-39
ENSG00000242076.2	-2.26629	1.61108e-19
ENSG00000242371.1	-2.17622	3.56103e-22
ENSG00000251039.2	-2.88514	4.34884e-28
ENSG00000251546.1	-2.19486	1.98003e-22
ENSG00000239975.2	-2.74852	6.49335e-26
ENSG00000239571.1	-2.36252	8.01651e-22
ENSG00000243264.2	-2.24497	8.54632e-25
ENSG00000242534.2	-2.64327	7.17388e-30
ENSG00000224607.4	-2.49063	4.48386e-07
ENSG00000241566.1	-2.1138	1.47722e-13
ENSG00000225523.2	-2.81601	5.88698e-23
ENSG00000211625.2	-2.56137	1.18279e-33
ENSG00000242766.1	-2.1769	6.22297e-15
ENSG00000241244.1	-2.805	2.64685e-30
ENSG00000224041.3	-2.50144	2.83823e-29
ENSG00000276566.1	-2.07784	4.28616e-23
ENSG00000278857.1	-2.18894	1.10088e-17
ENSG00000211632.4	-2.40663	8.7377e-24
ENSG00000242580.1	-1.50446	0.000455757
ENSG00000239819.2	-1.94694	2.91915e-11
ENSG00000172005.11	-1.49712	1.98133e-15
ENSG00000155066.16	-2.76392	3.57882e-53
ENSG00000115042.10	-1.32015	5.06658e-136
ENSG00000274286.2	-2.76952	1.34618e-131
ENSG00000188886.3	-1.82075	1.78398e-11
ENSG00000158050.5	-1.60075	1.04999e-39
ENSG00000144199.11	-1.53978	2.74514e-38
ENSG00000115085.13	-1.18934	7.05086e-27
ENSG00000168658.19	-1.45415	7.23893e-17
ENSG00000170500.13	-2.17374	1.17121e-36
ENSG00000230140.7	-1.05613	3.7612e-06
ENSG00000212283.1	-1.35164	1.70517e-20
ENSG00000281162.2	-1.18607	1.204e-30
ENSG00000115598.10	-1.22649	5.69236e-22
ENSG00000115602.17	-3.99239	3.9665e-136
ENSG00000115604.10	-1.73207	2.18031e-79
ENSG00000115607.9	-1.95465	3.91527e-68
ENSG00000236525.1	-1.58072	1.11365e-10
ENSG00000234389.1	-2.24143	3.92659e-52
ENSG00000225765.2	-4.4253	5.15709e-103
ENSG00000115641.19	-1.606	1.48285e-33
ENSG00000119147.10	-3.12948	2.65614e-53
ENSG00000240935.6	-4.0768	3.68247e-114
ENSG00000144057.15	-4.51051	2.54559e-102
ENSG00000198075.10	-1.23897	1.93135e-21
ENSG00000135960.10	-1.46016	1.85378e-26
ENSG00000204588.5	-1.1889	2.64154e-22
ENSG00000226928.1	-1.28135	0.000111375
ENSG00000125538.12	-1.99839	5.88715e-43
ENSG00000136689.18	-1.55168	6.97327e-57
ENSG00000225398.3	-2.0299	6.91474e-09
ENSG00000234199.3	-1.10302	4.20485e-11
ENSG00000175497.17	-5.86045	7.46417e-72
ENSG00000019169.10	-6.15022	3.96134e-188
ENSG00000115107.20	-1.70718	1.1979e-87
ENSG00000080293.9	-3.53327	1.84901e-50
ENSG00000163075.13	-1.84835	3.70725e-33
ENSG00000074047.21	-2.05958	2.08102e-28
ENSG00000235128.1	-1.33567	2.41978e-05
ENSG00000115718.17	-1.30565	1.5729e-62
ENSG00000272789.1	-2.83829	2.00562e-63
ENSG00000072163.19	-1.47432	4.63742e-54
ENSG00000229536.3	-1.24232	0.0003058
ENSG00000214100.8	-2.00023	3.60934e-05
ENSG00000213225.7	-1.6631	4.36493e-10
ENSG00000178162.8	-1.29662	1.90625e-16
ENSG00000136002.19	-3.12074	4.09865e-43
ENSG00000075886.11	-1.19325	4.00064e-09
ENSG00000204434.6	-1.48174	0.00174366
ENSG00000176771.17	-1.31995	4.42556e-48
ENSG00000226953.8	-1.48506	5.61175e-24
ENSG00000153086.14	-1.45079	4.48247e-47
ENSG00000168702.18	-1.47522	3.45714e-14
ENSG00000115919.15	-1.27272	8.66946e-45
ENSG00000075884.14	-1.22292	2.03423e-39
ENSG00000283994.1	-1.6295	1.49046e-22
ENSG00000169554.21	-1.17683	6.42906e-38
ENSG00000232606.2	-2.31492	3.1022e-14
ENSG00000150556.17	-4.03293	7.52019e-51
ENSG00000187123.15	-1.43565	6.36757e-12
ENSG00000231969.2	-1.8194	2.22976e-104
ENSG00000286081.1	-3.93121	1.15695e-154
ENSG00000230645.2	-4.22953	9.60383e-152
ENSG00000115963.13	-2.2459	7.97401e-163
ENSG00000224048.6	-1.27236	1.65758e-12
ENSG00000213197.3	-1.20175	7.05659e-07
ENSG00000287900.1	-2.75551	1.50524e-63
ENSG00000162989.5	-2.09451	5.50932e-34
ENSG00000153234.14	-1.46066	7.07383e-41
ENSG00000136541.14	-1.55805	1.64598e-26
ENSG00000115165.10	-1.1546	9.86364e-25
ENSG00000123612.16	-1.52036	3.91427e-48
ENSG00000007001.12	-1.92173	2.32907e-28
ENSG00000237327.1	-1.66406	4.98203e-15
ENSG00000241399.7	-1.38437	4.28357e-74
ENSG00000153246.13	-2.03264	1.014e-62
ENSG00000115221.12	-1.54089	1.53879e-11
ENSG00000144290.17	-1.88958	5.90607e-38
ENSG00000184611.12	-3.68673	3.6024e-53
ENSG00000115290.10	-1.25341	4.27218e-59
ENSG00000082438.17	-1.0884	5.62957e-62
ENSG00000224331.2	-1.27417	1.19711e-21
ENSG00000236283.5	-1.24044	1.26821e-35
ENSG00000153253.18	-1.89592	2.47521e-19
ENSG00000136531.17	-1.3956	6.33335e-19
ENSG00000178662.16	-1.15068	2.92101e-15
ENSG00000115339.14	-1.56814	8.48212e-42
ENSG00000235192.1	-1.65431	9.86477e-17
ENSG00000236107.10	-1.67752	4.51223e-12
ENSG00000169432.17	-1.43928	9.80453e-38
ENSG00000136546.16	-4.37339	1.6503e-80
ENSG00000163072.15	-1.23482	3.247e-39
ENSG00000073734.10	-1.90299	3.1368e-33
ENSG00000081479.15	-2.62169	5.06471e-32
ENSG00000163093.12	-1.09017	2.43944e-40
ENSG00000154479.13	-1.09746	3.78028e-15
ENSG00000071909.18	-1.05092	3.7403e-10
ENSG00000071967.12	-1.30385	2.77562e-28
ENSG00000232788.1	-1.2025	2.60642e-11
ENSG00000128655.18	-2.28186	4.90044e-56
ENSG00000079156.17	-1.18992	6.34195e-38
ENSG00000204311.14	-1.08985	8.93998e-42
ENSG00000155657.26	-1.22098	1.25044e-18
ENSG00000163492.15	-1.11586	2.08362e-13
ENSG00000144331.20	-1.96884	2.7693e-56
ENSG00000150722.10	-2.22695	1.45894e-53
ENSG00000115252.18	-1.61079	8.16882e-30
ENSG00000224063.6	-1.31606	8.67707e-48
ENSG00000187699.10	-1.83878	8.13888e-60
ENSG00000138378.19	-1.43564	3.18199e-53
ENSG00000280083.1	-1.40019	1.39859e-24
ENSG00000252130.1	-1.38739	4.84753e-05
ENSG00000168497.5	-1.1473	7.54583e-29
ENSG00000233766.7	-1.42384	9.41733e-11
ENSG00000144339.12	-2.61491	4.65428e-14
ENSG00000286358.1	-1.01104	0.00108026
ENSG00000224442.1	-1.98165	2.24418e-08
ENSG00000236977.1	-1.4802	6.68549e-17
ENSG00000231699.1	-2.02089	4.48847e-07
ENSG00000226124.7	-1.03222	6.68313e-46
ENSG00000138356.14	-1.88185	2.25443e-48
ENSG00000243478.9	-1.24923	1.17259e-18
ENSG00000155760.2	-1.2037	1.15508e-18
ENSG00000182329.14	-1.42838	4.24848e-26
ENSG00000222035.4	-2.66243	1.06057e-31
ENSG00000231903.1	-1.09775	3.15339e-10
ENSG00000264275.1	-1.13	0.000459779
ENSG00000204186.10	-2.36847	9.27036e-70
ENSG00000144410.5	-1.74248	3.58046e-31
ENSG00000279317.2	-1.59215	6.39281e-37
ENSG00000115361.8	-3.31616	2.12153e-95
ENSG00000021826.17	-2.31979	7.52261e-56
ENSG00000280837.1	-3.39698	9.30243e-75
ENSG00000178568.15	-3.49922	7.70738e-24
ENSG00000226276.1	-1.18777	6.24396e-16
ENSG00000115425.14	-1.34874	9.23521e-79
ENSG00000235042.1	-1.4317	0.00011889
ENSG00000225794.3	-2.13059	1.70075e-25
ENSG00000115457.10	-1.79862	1.83366e-37
ENSG00000115461.5	-1.1633	9.40673e-22
ENSG00000229754.1	-2.51462	2.66252e-86
ENSG00000180871.8	-2.46063	6.40821e-64
ENSG00000163464.8	-2.67228	1.07067e-66
ENSG00000179921.15	-1.59927	6.9734e-31
ENSG00000018280.17	-1.45823	1.04775e-30
ENSG00000135929.9	-1.18751	2.92701e-41
ENSG00000135925.9	-1.06582	2.66797e-09
ENSG00000213901.10	-1.0061	2.39257e-15
ENSG00000175084.12	-4.20883	2.7522e-61
ENSG00000072195.15	-2.42578	1.24761e-30
ENSG00000124006.15	-1.87071	6.17654e-47
ENSG00000272944.1	-2.10045	2.21729e-05
ENSG00000163082.10	-1.30607	7.12837e-15
ENSG00000124003.13	-1.59186	6.13158e-43
ENSG00000235225.1	-1.42841	1.12883e-13
ENSG00000081052.13	-1.37796	5.51299e-22
ENSG00000169031.20	-1.64734	4.56136e-23
ENSG00000135917.15	-1.91293	3.18864e-102
ENSG00000163053.11	-1.58303	2.69414e-34
ENSG00000225963.8	-2.41265	1.52634e-31
ENSG00000135914.6	-1.18429	3.00461e-15
ENSG00000156966.7	-1.25471	2.7063e-24
ENSG00000206885.1	-1.30935	2.05919e-18
ENSG00000207280.1	-1.06749	9.63632e-12
ENSG00000286942.1	-1.52304	6.50506e-10
ENSG00000171596.7	-1.50572	3.36508e-34
ENSG00000115468.12	-2.12069	1.30426e-61
ENSG00000241119.2	-1.00615	2.058e-12
ENSG00000244474.5	-2.42908	1.10101e-52
ENSG00000248114.1	-1.12368	1.89781e-13
ENSG00000228445.1	-1.62735	6.94868e-22
ENSG00000241635.8	-1.21846	1.26084e-21
ENSG00000185038.14	-2.51822	1.4464e-50
ENSG00000144481.17	-2.54895	6.85735e-78
ENSG00000286059.1	-2.51644	9.60249e-43
ENSG00000072080.11	-3.55866	2.19762e-100
ENSG00000279218.1	-2.75941	3.05144e-52
ENSG00000226442.2	-2.00207	1.49509e-15
ENSG00000235529.1	-2.80519	5.77308e-100
ENSG00000115648.14	-1.14344	2.61036e-33
ENSG00000124839.13	-1.28307	2.44438e-55
ENSG00000234949.2	-1.32685	1.73322e-41
ENSG00000229915.1	-1.603	1.6231e-07
ENSG00000233608.4	-1.62869	2.44509e-12
ENSG00000063660.9	-1.22795	8.6155e-31
ENSG00000130294.16	-1.41949	1.85854e-13
ENSG00000172482.5	-1.88872	8.48956e-66
ENSG00000226321.5	-2.33297	4.29229e-39
ENSG00000233392.5	-4.46716	1.27254e-129
ENSG00000223991.1	-6.26393	9.57986e-146
ENSG00000162804.14	-1.31669	1.18847e-48
ENSG00000234235.1	-2.07331	5.49227e-38
ENSG00000176720.6	-1.18267	1.1207e-39
ENSG00000180902.18	-1.00153	1.47928e-41
ENSG00000204099.11	-2.56664	1.41424e-55
ENSG00000235151.1	-1.61035	1.42233e-09
ENSG00000188011.5	-1.72314	2.67927e-12
ENSG00000216921.8	-2.67794	2.60727e-18
ENSG00000237940.3	-1.60027	8.87658e-37
ENSG00000280119.1	-1.77734	1.4428e-26
ENSG00000134121.10	-3.34397	1.01011e-34
ENSG00000144619.15	-2.0646	1.5825e-62
ENSG00000091181.19	-1.40273	2.03856e-14
ENSG00000175928.6	-4.08818	2.77039e-64
ENSG00000270207.2	-3.27588	2.64248e-10
ENSG00000132164.10	-3.43781	9.38489e-43
ENSG00000144712.12	-2.60565	3.61306e-91
ENSG00000163520.14	-1.30927	6.34838e-16
ENSG00000154764.6	-3.97471	1.19557e-24
ENSG00000144596.13	-1.8024	7.24772e-27
ENSG00000131379.10	-1.47064	2.41719e-23
ENSG00000263740.2	-1.31637	3.93159e-14
ENSG00000182568.17	-1.31449	2.40975e-63
ENSG00000183960.9	-1.92418	1.78822e-20
ENSG00000261734.1	-1.06564	1.36229e-06
ENSG00000224822.1	-1.55507	2.9178e-22
ENSG00000077092.19	-1.51836	3.32133e-51
ENSG00000272282.1	-1.26952	1.62198e-19
ENSG00000163508.13	-1.65987	1.91241e-42
ENSG00000283563.1	-1.84065	1.57547e-11
ENSG00000144642.22	-2.0023	2.58568e-73
ENSG00000235904.3	-2.173	4.64598e-46
ENSG00000173705.9	-1.85766	6.26037e-20
ENSG00000172995.16	-2.23287	1.05644e-34
ENSG00000144681.10	-1.78591	6.11495e-27
ENSG00000279727.1	-1.59913	2.39652e-19
ENSG00000234073.1	-1.51798	8.09604e-12
ENSG00000144668.12	-2.19488	4.14937e-98
ENSG00000235482.1	-3.04908	1.1854e-12
ENSG00000060971.18	-1.9134	4.41792e-159
ENSG00000168356.12	-1.76657	5.40096e-43
ENSG00000144655.15	-1.91152	8.30613e-140
ENSG00000170011.14	-1.55012	8.21979e-28
ENSG00000114812.13	-4.52477	1.04752e-240
ENSG00000232354.8	-1.44967	7.24408e-08
ENSG00000235288.3	-1.0375	5.47025e-12
ENSG00000273328.5	-1.54063	3.73097e-27
ENSG00000273291.5	-1.97754	5.97588e-33
ENSG00000180432.6	-3.07806	2.73652e-74
ENSG00000236459.1	-1.80526	3.64729e-24
ENSG00000182983.15	-1.51188	9.21278e-49
ENSG00000144649.9	-3.11893	1.05707e-100
ENSG00000261786.1	-3.3006	9.48698e-30
ENSG00000225873.4	-1.18492	1.04563e-23
ENSG00000196653.12	-1.17708	1.24581e-25
ENSG00000163815.6	-1.78554	1.9385e-48
ENSG00000249992.2	-1.13775	9.55323e-18
ENSG00000163817.16	-2.72817	9.92175e-25
ENSG00000173585.16	-1.38465	1.34143e-05
ENSG00000173578.7	-1.23937	1.50128e-13
ENSG00000163823.4	-1.08532	1.40059e-24
ENSG00000012223.13	-1.13253	7.35146e-13
ENSG00000163825.4	-1.62197	7.29023e-27
ENSG00000206549.13	-1.25839	1.48218e-14
ENSG00000261603.3	-1.08262	7.79557e-09
ENSG00000160801.14	-4.89626	5.44552e-235
ENSG00000224895.1	-1.67676	5.39082e-07
ENSG00000164047.6	-2.0988	1.6782e-14
ENSG00000178537.10	-1.03069	4.03026e-59
ENSG00000173531.15	-1.44429	1.5987e-76
ENSG00000007402.11	-1.55757	9.06398e-32
ENSG00000114737.15	-1.2679	1.72626e-53
ENSG00000114779.19	-1.05171	4.39188e-76
ENSG00000286419.1	-1.72343	7.65493e-17
ENSG00000023330.15	-1.18328	1.5624e-35
ENSG00000168237.18	-1.13527	4.91153e-51
ENSG00000010327.10	-1.67774	4.90038e-68
ENSG00000055957.11	-1.36941	1.38666e-60
ENSG00000055955.17	-1.14536	3.61387e-46
ENSG00000243696.5	-1.55131	1.13935e-56
ENSG00000239799.1	-1.32076	5.63499e-12
ENSG00000248592.7	-1.3717	1.0654e-44
ENSG00000242142.1	-1.2907	1.87691e-07
ENSG00000244161.1	-1.90812	2.96489e-39
ENSG00000163687.14	-3.52565	1.38323e-152
ENSG00000163686.15	-1.05647	2.94757e-56
ENSG00000168306.13	-1.42889	1.79124e-73
ENSG00000243384.1	-2.67775	4.32658e-80
ENSG00000244383.2	-3.38456	1.40672e-78
ENSG00000163618.18	-2.44748	7.15904e-23
ENSG00000224479.6	-1.05078	9.04487e-15
ENSG00000285258.1	-1.16596	1.40484e-15
ENSG00000163637.13	-1.52482	3.99229e-40
ENSG00000241158.7	-2.70523	1.64157e-45
ENSG00000241684.6	-1.80095	5.58721e-43
ENSG00000272610.1	-1.2643	2.06839e-23
ENSG00000203647.2	-1.31172	0.000483436
ENSG00000241587.3	-1.45206	4.8944e-07
ENSG00000288039.1	-1.88541	1.40044e-18
ENSG00000172340.14	-1.09868	2.505e-63
ENSG00000183662.11	-1.23469	1.03444e-11
ENSG00000114541.15	-1.08223	1.02796e-89
ENSG00000163412.13	-1.45207	8.2032e-48
ENSG00000170837.3	-1.20244	8.17597e-10
ENSG00000163421.9	-2.71753	9.64755e-38
ENSG00000121440.15	-2.72351	8.56253e-53
ENSG00000242741.2	-4.35995	1.3014e-17
ENSG00000113805.8	-5.58758	3.69448e-152
ENSG00000243422.2	-1.44391	3.23202e-29
ENSG00000242516.2	-1.84905	4.6905e-39
ENSG00000185008.17	-1.41472	2.1199e-13
ENSG00000243694.3	-5.22568	2.55532e-136
ENSG00000242009.2	-1.64965	0.000119946
ENSG00000175161.13	-3.29749	3.53236e-54
ENSG00000044524.11	-2.27773	9.36064e-48
ENSG00000184500.16	-1.16234	1.68508e-81
ENSG00000178750.3	-1.82939	5.46744e-17
ENSG00000269028.3	-1.35088	7.59265e-24
ENSG00000080224.17	-1.96886	4.42976e-07
ENSG00000154165.5	-1.13069	8.93878e-11
ENSG00000286602.1	-1.09103	2.25662e-23
ENSG00000064225.12	-1.62383	1.30025e-114
ENSG00000249274.1	-1.23385	8.76545e-32
ENSG00000168386.18	-1.0314	5.88744e-24
ENSG00000114021.12	-1.0852	8.30013e-108
ENSG00000181458.10	-1.81937	2.11201e-46
ENSG00000144820.8	-2.80409	1.70739e-170
ENSG00000154175.17	-2.71619	1.90347e-52
ENSG00000144802.11	-1.30244	4.80229e-59
ENSG00000287682.1	-1.5268	1.17271e-19
ENSG00000241280.1	-1.00407	0.000281069
ENSG00000170044.8	-2.48953	4.57246e-20
ENSG00000241754.2	-2.45082	1.52214e-52
ENSG00000241224.8	-4.04954	4.77314e-117
ENSG00000121570.12	-2.66701	2.23773e-36
ENSG00000228980.4	-2.25434	5.84782e-13
ENSG00000114529.12	-1.73024	4.96289e-21
ENSG00000174500.13	-1.09081	3.29668e-18
ENSG00000261488.1	-1.68374	5.02793e-12
ENSG00000178075.20	-1.93134	5.89491e-119
ENSG00000287805.1	-1.51187	1.46686e-15
ENSG00000285836.1	-1.18744	0.000481904
ENSG00000185565.12	-2.13358	1.55498e-21
ENSG00000114638.8	-4.03297	1.99354e-25
ENSG00000285585.1	-1.97779	4.76207e-39
ENSG00000144852.17	-2.11145	1.04803e-69
ENSG00000240471.1	-1.08147	6.6514e-05
ENSG00000113924.12	-1.52281	1.25629e-64
ENSG00000163833.8	-1.36928	8.51793e-06
ENSG00000180353.11	-1.16781	1.1017e-37
ENSG00000222057.1	-1.90949	4.04559e-26
ENSG00000145103.15	-1.25967	1.79636e-13
ENSG00000036828.16	-3.68218	2.09982e-56
ENSG00000173200.13	-1.03779	5.81694e-18
ENSG00000173175.14	-1.77995	9.91234e-39
ENSG00000065371.17	-1.1857	0.000583983
ENSG00000280042.1	-1.07145	2.95274e-12
ENSG00000252965.1	-1.11079	5.47085e-25
ENSG00000243429.1	-2.02059	1.5313e-30
ENSG00000239804.1	-1.13624	1.9407e-05
ENSG00000114547.10	-1.75451	1.42906e-27
ENSG00000144908.13	-2.06538	1.32005e-48
ENSG00000272020.1	-1.3468	1.78873e-07
ENSG00000287440.1	-1.06628	4.98864e-05
ENSG00000159650.9	-4.8226	3.79909e-150
ENSG00000114631.11	-1.62162	9.19432e-20
ENSG00000074416.14	-1.27932	3.92788e-41
ENSG00000187715.13	-1.36356	0.00020197
ENSG00000114654.7	-1.43148	1.01459e-32
ENSG00000273437.1	-1.08558	7.85502e-31
ENSG00000228252.9	-1.2048	4.67977e-15
ENSG00000206384.10	-5.87894	2.5201e-134
ENSG00000240303.8	-1.06049	4.6562e-30
ENSG00000129048.7	-1.1525	6.03265e-18
ENSG00000091513.16	-1.52623	8.6949e-58
ENSG00000244062.1	-1.42368	7.31857e-30
ENSG00000240006.1	-1.35629	2.59093e-23
ENSG00000260633.1	-1.17428	9.56692e-12
ENSG00000154928.18	-2.62913	1.12704e-79
ENSG00000240086.7	-6.11896	5.80351e-147
ENSG00000174564.13	-2.10282	1.10796e-56
ENSG00000118017.4	-3.89312	6.75323e-28
ENSG00000181322.14	-1.22989	2.2299e-10
ENSG00000114115.10	-2.94821	1.49325e-93
ENSG00000158258.16	-2.46406	9.98766e-52
ENSG00000175093.5	-3.59879	1.17965e-66
ENSG00000243818.5	-1.73712	2.62402e-36
ENSG00000181804.15	-1.24839	6.60907e-41
ENSG00000114698.15	-1.33403	9.10196e-72
ENSG00000279320.1	-1.25201	1.18336e-35
ENSG00000152977.10	-1.36732	2.28529e-12
ENSG00000144891.17	-1.58525	2.8775e-57
ENSG00000047457.14	-1.56596	3.61342e-62
ENSG00000286714.1	-1.55401	5.6062e-42
ENSG00000241985.1	-1.15009	1.24098e-06
ENSG00000287688.1	-1.86514	2.01006e-23
ENSG00000239265.5	-2.56251	1.48887e-28
ENSG00000181631.7	-1.75636	3.02165e-57
ENSG00000169313.9	-2.00877	1.7645e-51
ENSG00000152580.8	-1.7079	1.7589e-32
ENSG00000242097.1	-1.1606	6.02578e-06
ENSG00000240602.7	-1.09531	1.15166e-28
ENSG00000114771.14	-1.04981	2.34728e-26
ENSG00000243069.8	-1.51314	6.17444e-46
ENSG00000114790.13	-1.75671	3.46847e-82
ENSG00000196549.10	-3.43521	7.19297e-71
ENSG00000169282.17	-1.59933	1.39823e-30
ENSG00000241544.2	-1.1404	2.12852e-11
ENSG00000197415.12	-2.81342	3.95621e-60
ENSG00000178053.19	-1.58284	1.95015e-30
ENSG00000238741.1	-1.57122	9.52337e-38
ENSG00000179674.4	-2.21027	2.69517e-25
ENSG00000196542.8	-1.13828	5.92596e-09
ENSG00000240567.1	-1.02222	1.42827e-08
ENSG00000121871.4	-5.40751	4.05676e-94
ENSG00000244128.7	-1.99322	1.41369e-20
ENSG00000114200.10	-2.51927	6.17068e-72
ENSG00000184378.3	-1.1923	2.19723e-36
ENSG00000013297.11	-1.6168	4.43144e-28
ENSG00000199488.1	-1.26514	5.68057e-37
ENSG00000163581.14	-1.08167	1.68542e-27
ENSG00000075651.16	-1.13813	4.49412e-49
ENSG00000177694.16	-1.94663	2.88673e-69
ENSG00000225790.2	-1.22862	2.29425e-19
ENSG00000197584.12	-2.00828	6.79365e-08
ENSG00000285336.1	-2.14541	8.12145e-19
ENSG00000242522.1	-2.58821	3.43166e-47
ENSG00000090539.15	-1.62696	3.22337e-64
ENSG00000224153.3	-1.90936	1.02133e-16
ENSG00000182580.3	-1.64844	3.18705e-21
ENSG00000273403.1	-1.56038	3.70723e-13
ENSG00000272922.1	-1.25706	0.00315306
ENSG00000113790.11	-1.60221	1.01304e-81
ENSG00000229704.1	-1.44312	4.13602e-16
ENSG00000145192.13	-1.78937	1.96815e-47
ENSG00000090512.12	-2.64117	9.75031e-72
ENSG00000113905.5	-2.73954	2.32975e-71
ENSG00000113889.14	-1.02467	3.27101e-28
ENSG00000127241.16	-1.73155	7.51741e-104
ENSG00000279891.1	-1.24421	2.31025e-17
ENSG00000188001.10	-1.68259	2.168e-63
ENSG00000090530.10	-2.02486	2.78758e-91
ENSG00000196083.10	-1.99074	2.63847e-107
ENSG00000231047.1	-3.06204	1.9544e-72
ENSG00000223117.1	-2.20205	4.41685e-40
ENSG00000205835.9	-1.56368	3.94025e-29
ENSG00000127252.7	-1.50399	2.01376e-05
ENSG00000127249.15	-4.31952	7.05887e-116
ENSG00000230102.8	-1.25061	2.16709e-37
ENSG00000238097.2	-2.09472	2.61438e-60
ENSG00000178772.7	-1.43417	4.27044e-36
ENSG00000178732.5	-1.15203	1.02694e-09
ENSG00000224614.2	-1.62547	3.14747e-23
ENSG00000224652.2	-4.38798	9.69303e-98
ENSG00000163958.14	-2.23553	1.7548e-49
ENSG00000163959.10	-1.86799	7.08426e-37
ENSG00000161267.12	-1.30776	1.81022e-59
ENSG00000286755.1	-3.3923	1.10014e-73
ENSG00000232832.1	-3.93415	1.10229e-38
ENSG00000226435.10	-3.30516	2.57902e-65
ENSG00000207642.1	-1.20038	0.00173894
ENSG00000242686.4	-1.32841	2.41579e-07
ENSG00000169026.12	-2.01297	3.43739e-70
ENSG00000178222.13	-2.06814	6.06398e-35
ENSG00000273179.1	-1.13931	9.16812e-06
ENSG00000206113.10	-1.4785	9.19432e-20
ENSG00000109758.8	-5.47035	3.62108e-190
ENSG00000286900.1	-2.77136	1.27772e-44
ENSG00000173040.13	-1.72694	1.63069e-37
ENSG00000072840.13	-2.29063	6.24776e-52
ENSG00000184985.16	-1.91435	1.02906e-36
ENSG00000205959.4	-1.46103	3.20441e-44
ENSG00000109625.19	-1.67614	0.000277126
ENSG00000288075.1	-1.59403	6.72577e-32
ENSG00000109667.12	-1.53662	9.14373e-43
ENSG00000250413.1	-1.78638	8.41241e-45
ENSG00000250613.1	-2.02245	1.26456e-07
ENSG00000249252.5	-1.5157	1.67634e-12
ENSG00000163145.12	-2.77986	1.72186e-64
ENSG00000109743.11	-1.31657	2.24385e-46
ENSG00000004468.13	-1.04308	3.18803e-18
ENSG00000137441.8	-1.35235	6.32727e-20
ENSG00000007062.11	-5.048	1.52778e-109
ENSG00000169744.13	-1.02415	9.0064e-26
ENSG00000151552.12	-1.54416	7.60845e-100
ENSG00000286046.1	-2.47838	1.61865e-05
ENSG00000145147.20	-1.15474	1.69698e-16
ENSG00000185774.16	-1.58017	4.05414e-08
ENSG00000152990.14	-1.83975	4.35717e-132
ENSG00000249948.6	-3.20759	7.71396e-106
ENSG00000251292.1	-1.47285	0.000414722
ENSG00000109819.9	-2.24624	3.03668e-79
ENSG00000109610.6	-1.63403	3.51218e-26
ENSG00000157765.13	-5.22992	4.08742e-87
ENSG00000169851.15	-1.64838	1.78169e-19
ENSG00000248685.6	-1.31328	4.2528e-19
ENSG00000287320.1	-1.0091	3.27981e-12
ENSG00000197057.9	-1.8404	1.05794e-33
ENSG00000174145.8	-1.8235	1.61916e-14
ENSG00000121895.8	-1.35603	2.5411e-29
ENSG00000224097.5	-1.37251	2.77302e-35
ENSG00000263642.1	-2.10394	8.33183e-07
ENSG00000179299.17	-3.10325	2.0134e-70
ENSG00000248780.1	-1.78762	6.11509e-09
ENSG00000064042.18	-1.25459	7.7673e-43
ENSG00000188848.16	-2.61729	1.38651e-44
ENSG00000163285.8	-2.3997	2.17116e-25
ENSG00000242262.1	-1.7882	3.27545e-35
ENSG00000163293.12	-1.89607	2.67645e-68
ENSG00000198515.13	-2.63666	3.15793e-121
ENSG00000074966.11	-1.12965	2.44257e-35
ENSG00000145247.12	-1.01418	2.09554e-28
ENSG00000109182.12	-3.3545	1.04259e-25
ENSG00000163071.11	-3.07957	5.63165e-143
ENSG00000249706.1	-3.31692	2.9791e-27
ENSG00000250815.1	-1.45224	0.000126876
ENSG00000229585.4	-1.13799	1.66823e-09
ENSG00000134853.12	-3.44489	6.94158e-86
ENSG00000109265.14	-1.641	3.77235e-17
ENSG00000245067.7	-1.03824	3.80093e-09
ENSG00000251049.2	-8.27551	3.06752e-105
ENSG00000250333.2	-7.24096	4.67438e-97
ENSG00000035720.8	-1.55705	2.6038e-25
ENSG00000162840.4	-3.07603	4.30455e-63
ENSG00000250566.1	-1.05599	0.00632782
ENSG00000251074.1	-1.34472	2.00742e-19
ENSG00000196620.10	-1.89411	6.44544e-44
ENSG00000109181.12	-2.45788	5.39414e-80
ENSG00000248613.1	-1.23003	0.00214133
ENSG00000272626.1	-1.77398	7.48603e-24
ENSG00000251685.3	-1.29482	2.45001e-22
ENSG00000171234.14	-2.76355	1.22664e-126
ENSG00000251177.2	-1.1706	3.45891e-05
ENSG00000173597.9	-1.50215	2.04093e-37
ENSG00000284695.1	-2.91196	4.73851e-46
ENSG00000109193.12	-2.62036	2.09662e-64
ENSG00000132465.11	-2.75909	1.91105e-54
ENSG00000080493.17	-1.76054	3.39425e-54
ENSG00000145321.13	-1.17492	1.77524e-49
ENSG00000222236.1	-1.45788	3.34745e-27
ENSG00000249976.2	-1.73693	3.85258e-13
ENSG00000163631.17	-2.4376	1.02039e-138
ENSG00000079557.5	-2.79907	5.27026e-124
ENSG00000250436.1	-2.04956	2.86314e-67
ENSG00000249970.1	-2.54283	1.24321e-12
ENSG00000169429.11	-1.30457	2.28427e-14
ENSG00000124875.10	-3.9811	8.14628e-64
ENSG00000109272.4	-2.93413	1.16715e-34
ENSG00000163739.5	-2.40278	7.23216e-35
ENSG00000163737.4	-2.50635	2.11989e-34
ENSG00000163736.4	-3.04627	1.39703e-56
ENSG00000163735.7	-1.22414	4.73888e-08
ENSG00000081041.9	-3.33444	4.07733e-161
ENSG00000163738.18	-1.22881	4.78201e-89
ENSG00000124882.4	-1.5102	8.57729e-11
ENSG00000109321.11	-1.59217	3.106e-24
ENSG00000138769.11	-1.59945	5.37507e-18
ENSG00000156194.18	-1.83938	3.90732e-10
ENSG00000138744.16	-1.63847	4.32965e-135
ENSG00000156219.16	-1.32904	1.89765e-11
ENSG00000287401.1	-3.35102	2.55032e-144
ENSG00000163749.17	-1.10204	2.2648e-30
ENSG00000233860.2	-1.16279	4.10121e-07
ENSG00000156234.7	-1.02603	3.84476e-07
ENSG00000138759.19	-1.65992	3.39793e-21
ENSG00000138772.13	-2.80234	2.91175e-82
ENSG00000138669.9	-1.40139	4.8552e-10
ENSG00000138670.17	-1.94697	1.66784e-121
ENSG00000145284.12	-2.37687	1.39435e-82
ENSG00000145287.10	-3.41206	1.70632e-159
ENSG00000138678.11	-1.37942	5.60227e-40
ENSG00000180769.10	-1.19822	1.32836e-45
ENSG00000109339.24	-1.86845	1.55551e-41
ENSG00000163629.13	-2.65948	9.13609e-86
ENSG00000170509.12	-5.06297	5.65185e-160
ENSG00000118777.12	-1.60651	6.2813e-62
ENSG00000138646.9	-1.03107	4.87538e-34
ENSG00000248019.3	-1.05257	5.73652e-34
ENSG00000138640.15	-2.10927	3.7306e-111
ENSG00000270720.1	-1.23569	6.99789e-26
ENSG00000145335.16	-1.49183	7.75642e-26
ENSG00000138722.10	-1.54337	1.60139e-27
ENSG00000163110.15	-1.00076	1.30524e-71
ENSG00000138696.11	-3.83759	7.92221e-72
ENSG00000182168.15	-1.63867	4.52041e-35
ENSG00000271474.1	-1.70727	9.65151e-22
ENSG00000287512.1	-1.63568	1.14081e-09
ENSG00000198099.8	-4.25015	3.07924e-150
ENSG00000172955.17	-2.11535	2.12733e-98
ENSG00000187758.8	-2.89227	4.53988e-127
ENSG00000196616.14	-2.87849	7.96985e-105
ENSG00000248144.6	-3.33655	6.64504e-116
ENSG00000196344.11	-1.66866	8.68918e-17
ENSG00000164038.16	-1.36001	2.75135e-92
ENSG00000164039.15	-1.91613	3.09987e-149
ENSG00000248740.6	-3.60159	9.12773e-152
ENSG00000251577.5	-1.01522	3.38903e-05
ENSG00000236699.9	-1.93642	1.78597e-22
ENSG00000245293.3	-1.83644	2.91243e-75
ENSG00000249604.1	-1.09072	1.62631e-11
ENSG00000138796.16	-1.00827	3.39028e-60
ENSG00000164089.9	-1.82702	2.12752e-41
ENSG00000188517.16	-4.30367	1.70347e-131
ENSG00000249465.1	-1.21251	2.29021e-11
ENSG00000285330.1	-1.22328	2.43215e-08
ENSG00000205403.13	-1.74904	3.18098e-113
ENSG00000183423.12	-1.08754	3.39648e-16
ENSG00000145362.20	-1.37127	2.856e-28
ENSG00000180801.14	-1.0024	1.16933e-19
ENSG00000164100.9	-6.62746	3.2421e-141
ENSG00000164099.3	-2.63787	2.07742e-35
ENSG00000260404.3	-1.18741	5.65383e-53
ENSG00000172403.11	-1.19088	1.00477e-22
ENSG00000173376.14	-1.98944	2.45419e-17
ENSG00000050730.16	-1.14311	7.31443e-15
ENSG00000287692.1	-1.00565	1.50626e-06
ENSG00000273007.2	-1.22263	1.27245e-33
ENSG00000170917.14	-1.19072	1.24065e-69
ENSG00000286700.1	-4.16505	1.32244e-43
ENSG00000196159.11	-1.34112	8.60567e-38
ENSG00000282855.1	-1.1042	6.31686e-11
ENSG00000138709.19	-1.04425	4.84851e-107
ENSG00000248394.1	-1.39136	7.59667e-07
ENSG00000273077.1	-1.17782	2.70941e-19
ENSG00000189184.11	-1.09073	4.2813e-18
ENSG00000151014.6	-2.58809	3.34125e-144
ENSG00000170153.11	-2.80669	4.26737e-73
ENSG00000109445.11	-1.10413	9.46892e-137
ENSG00000248810.2	-2.52423	2.06234e-39
ENSG00000272632.1	-2.36806	5.07826e-24
ENSG00000251600.8	-2.22469	1.59749e-33
ENSG00000236296.8	-1.08225	4.28424e-09
ENSG00000248890.2	-3.78517	3.70619e-102
ENSG00000164161.10	-7.12738	1.2529e-196
ENSG00000151611.16	-1.28097	5.929e-109
ENSG00000250673.2	-1.97776	4.81567e-37
ENSG00000071205.12	-1.83466	5.57793e-85
ENSG00000151623.15	-1.39925	1.30208e-83
ENSG00000287292.1	-2.4048	2.48288e-18
ENSG00000181541.6	-1.94918	1.39166e-35
ENSG00000270265.1	-1.0888	5.48735e-05
ENSG00000164142.16	-1.51181	1.48573e-37
ENSG00000251455.1	-1.1759	5.66771e-05
ENSG00000170006.12	-2.36727	1.36932e-71
ENSG00000137462.8	-1.09685	1.23611e-26
ENSG00000197410.14	-2.22727	4.01348e-22
ENSG00000171564.11	-2.07218	1.0388e-93
ENSG00000171560.16	-1.75505	4.17107e-81
ENSG00000171557.17	-1.81751	2.18669e-76
ENSG00000287770.1	-2.44746	1.60243e-85
ENSG00000121207.12	-3.25253	4.65417e-183
ENSG00000151962.8	-1.05445	1.19713e-07
ENSG00000164114.19	-1.49939	3.23663e-29
ENSG00000251244.2	-1.83274	1.72861e-21
ENSG00000164116.16	-1.32473	1.07375e-28
ENSG00000260244.1	-1.66598	1.44714e-47
ENSG00000151790.9	-2.22651	1.57432e-71
ENSG00000109738.11	-2.26649	2.93226e-27
ENSG00000287226.1	-1.07104	1.41402e-09
ENSG00000171509.16	-1.9748	5.77369e-48
ENSG00000171503.12	-1.65976	2.5683e-149
ENSG00000271817.2	-1.46173	4.35896e-24
ENSG00000052795.13	-1.15993	5.79869e-56
ENSG00000164128.7	-3.47672	6.28579e-128
ENSG00000164129.12	-3.52245	2.6831e-75
ENSG00000183439.9	-1.05167	2.08341e-13
ENSG00000196104.11	-2.76864	1.54648e-17
ENSG00000109511.12	-3.70999	4.75778e-158
ENSG00000145439.12	-1.2042	8.51965e-97
ENSG00000248319.2	-3.56663	6.80784e-83
ENSG00000198948.12	-2.16428	3.17075e-76
ENSG00000109576.14	-2.7894	3.0754e-181
ENSG00000250266.2	-7.49785	4.91913e-152
ENSG00000251061.2	-7.92714	6.67221e-73
ENSG00000174473.16	-4.34572	9.46108e-66
ENSG00000286039.1	-1.32117	1.76814e-16
ENSG00000164107.8	-4.87218	1.42727e-124
ENSG00000237125.10	-5.11702	3.25211e-141
ENSG00000248174.6	-3.27382	5.25312e-68
ENSG00000164120.14	-2.66853	8.25492e-56
ENSG00000251584.2	-1.92522	4.13317e-37
ENSG00000150625.16	-4.23637	7.94558e-135
ENSG00000150627.15	-2.10475	2.097e-44
ENSG00000218336.9	-3.73774	5.3121e-49
ENSG00000272646.1	-1.58342	1.06939e-33
ENSG00000249096.7	-2.52279	2.68751e-120
ENSG00000151726.14	-1.61419	2.00063e-73
ENSG00000249138.1	-1.74448	7.42219e-36
ENSG00000251139.2	-1.65063	2.26686e-19
ENSG00000286256.2	-1.01174	4.65208e-08
ENSG00000251230.6	-2.14755	7.41619e-36
ENSG00000249173.6	-6.01764	1.48359e-302
ENSG00000186352.9	-1.37584	7.96768e-41
ENSG00000154556.18	-1.06768	3.02244e-42
ENSG00000207497.1	-2.10987	1.61942e-26
ENSG00000285745.1	-2.1159	9.29879e-20
ENSG00000109794.13	-1.79976	2.9284e-109
ENSG00000250327.1	-1.91924	9.20573e-87
ENSG00000145476.16	-1.74506	2.10873e-113
ENSG00000164344.16	-2.32702	1.43648e-152
ENSG00000088926.14	-1.88568	6.00149e-101
ENSG00000251165.6	-1.44401	3.11284e-25
ENSG00000153404.14	-1.45728	3.98194e-13
ENSG00000073578.17	-1.09241	3.49386e-73
ENSG00000206077.11	-1.65924	6.49908e-43
ENSG00000188818.12	-1.40091	5.79012e-42
ENSG00000215246.5	-1.98009	1.09797e-29
ENSG00000272347.1	-1.67868	5.88692e-17
ENSG00000145506.14	-2.63788	2.49379e-62
ENSG00000249201.2	-3.31466	3.48133e-105
ENSG00000174358.16	-5.96855	1.42319e-84
ENSG00000250490.1	-1.41752	2.77357e-18
ENSG00000215218.4	-1.60416	9.48957e-28
ENSG00000250056.7	-3.60813	9.43113e-104
ENSG00000145545.12	-1.65516	1.30317e-90
ENSG00000215217.7	-3.02814	7.22284e-82
ENSG00000112902.12	-1.02353	5.89086e-22
ENSG00000250786.2	-1.70864	6.75303e-39
ENSG00000164237.9	-1.42496	1.40429e-56
ENSG00000145491.12	-1.03143	2.49171e-09
ENSG00000164236.12	-1.03987	6.30925e-19
ENSG00000272324.5	-1.46072	1.31259e-13
ENSG00000169862.19	-2.8196	1.56355e-32
ENSG00000154153.13	-3.74768	1.76728e-139
ENSG00000246214.2	-2.47517	6.19428e-14
ENSG00000145555.15	-2.07694	4.67438e-97
ENSG00000176788.9	-1.60321	8.91965e-44
ENSG00000286751.1	-1.57476	1.14931e-08
ENSG00000248874.5	-1.40528	1.70752e-08
ENSG00000286625.1	-2.82901	8.78573e-31
ENSG00000230829.3	-2.15657	4.81845e-09
ENSG00000113389.16	-1.46474	2.98837e-30
ENSG00000251443.2	-4.09413	3.33775e-63
ENSG00000113492.14	-2.02308	1.66935e-75
ENSG00000168685.15	-1.43474	8.19912e-25
ENSG00000145626.12	-1.89381	1.23237e-30
ENSG00000152620.13	-1.19071	8.65974e-78
ENSG00000164188.8	-3.74406	9.22885e-134
ENSG00000248587.8	-1.73808	3.1948e-18
ENSG00000168621.15	-2.38594	4.15112e-32
ENSG00000113594.10	-3.11766	1.38517e-166
ENSG00000244968.7	-1.31436	6.83497e-23
ENSG00000286809.1	-1.0044	0.000151315
ENSG00000113600.11	-4.67146	2.17778e-133
ENSG00000271334.6	-1.38506	1.56395e-13
ENSG00000112936.19	-4.62226	2.74309e-131
ENSG00000039537.13	-2.5667	2.2903e-106
ENSG00000182836.10	-3.93158	2.39009e-85
ENSG00000112964.14	-2.6428	2.29132e-150
ENSG00000270513.1	-1.53954	2.10613e-34
ENSG00000250722.6	-1.06944	1.70097e-36
ENSG00000177453.7	-1.63211	4.1392e-36
ENSG00000070193.5	-3.26417	3.34836e-33
ENSG00000164588.8	-3.0403	1.05644e-15
ENSG00000134363.12	-1.31197	3.66849e-28
ENSG00000217791.4	-2.86055	3.72607e-26
ENSG00000113088.6	-1.34671	4.40448e-25
ENSG00000164512.18	-2.99579	8.00267e-97
ENSG00000251435.1	-2.29374	3.961e-18
ENSG00000250961.2	-2.44922	2.47471e-20
ENSG00000287709.1	-1.53047	7.84705e-43
ENSG00000175857.8	-1.27876	3.20462e-19
ENSG00000251682.1	-1.03265	1.72907e-05
ENSG00000250461.1	-2.15095	3.31867e-50
ENSG00000251575.3	-2.61753	1.27224e-15
ENSG00000164197.12	-2.04471	4.75162e-80
ENSG00000186479.5	-1.69862	1.80567e-22
ENSG00000286314.1	-1.19223	1.41824e-12
ENSG00000249364.6	-3.79087	2.77619e-116
ENSG00000248884.1	-4.39517	1.70834e-180
ENSG00000248359.2	-4.33987	2.95399e-144
ENSG00000250387.3	-2.70817	9.36911e-46
ENSG00000253985.1	-1.48568	0.000125288
ENSG00000164220.7	-1.37305	1.121e-16
ENSG00000164251.5	-1.29437	1.44487e-18
ENSG00000145708.11	-5.74506	6.80935e-253
ENSG00000238961.1	-1.06113	5.66892e-11
ENSG00000113231.13	-1.64238	1.01179e-29
ENSG00000132837.15	-2.06268	7.68107e-100
ENSG00000214890.3	-1.79244	6.76919e-33
ENSG00000132840.10	-1.21704	1.37639e-40
ENSG00000145692.15	-2.83286	2.78758e-91
ENSG00000164309.15	-2.00736	1.5366e-73
ENSG00000250258.1	-1.09538	3.00492e-08
ENSG00000131730.16	-2.84125	2.67179e-43
ENSG00000172497.9	-2.02691	2.24938e-63
ENSG00000254132.1	-1.71296	1.58626e-07
ENSG00000243806.1	-1.55703	2.97299e-08
ENSG00000173221.14	-1.17061	3.4795e-56
ENSG00000251409.1	-3.39284	1.38666e-60
ENSG00000236882.8	-4.45653	2.05069e-162
ENSG00000272021.1	-3.05457	1.12342e-65
ENSG00000250362.1	-1.20076	1.51633e-11
ENSG00000206997.1	-1.14486	8.69897e-07
ENSG00000249746.1	-2.05723	3.803e-49
ENSG00000248734.2	-1.38562	1.10098e-32
ENSG00000246763.7	-1.02033	9.64807e-23
ENSG00000270225.1	-2.22721	1.94139e-06
ENSG00000173930.9	-3.89112	1.33396e-91
ENSG00000184349.13	-2.14721	2.92604e-31
ENSG00000286882.1	-1.0703	4.72341e-11
ENSG00000145777.15	-2.98195	2.06085e-97
ENSG00000152495.11	-1.94494	2.70059e-63
ENSG00000129595.13	-1.91251	2.93607e-88
ENSG00000278921.2	-2.01835	6.89623e-49
ENSG00000171444.18	-2.04317	1.3696e-87
ENSG00000232633.4	-1.17518	1.33196e-09
ENSG00000080709.16	-5.58539	2.25706e-285
ENSG00000248709.3	-3.42646	5.1815e-107
ENSG00000129596.5	-1.38094	4.70282e-44
ENSG00000092421.16	-1.38136	1.66947e-27
ENSG00000248663.6	-1.85858	2.82995e-22
ENSG00000250328.6	-1.26924	2.95268e-22
ENSG00000279118.1	-1.17489	3.60698e-66
ENSG00000145794.17	-2.61239	5.30817e-51
ENSG00000164406.8	-1.53728	3.35171e-55
ENSG00000248559.1	-1.06833	1.75912e-05
ENSG00000250564.2	-2.51013	3.89205e-50
ENSG00000244921.2	-1.35339	1.34801e-15
ENSG00000249119.1	-1.2629	3.50347e-23
ENSG00000248923.1	-1.48514	5.24447e-26
ENSG00000247627.2	-1.72236	1.56091e-58
ENSG00000198868.3	-1.37761	3.5241e-14
ENSG00000145824.13	-7.81267	1.41956e-272
ENSG00000145832.14	-2.17669	6.30833e-23
ENSG00000145826.9	-2.96912	1.56081e-82
ENSG00000164616.16	-1.40299	7.59355e-11
ENSG00000146021.15	-1.29345	1.09601e-27
ENSG00000287067.1	-1.48847	0.000137469
ENSG00000226306.6	-1.63336	1.4827e-12
ENSG00000112981.5	-2.99844	1.34585e-86
ENSG00000146013.11	-2.17658	4.06368e-13
ENSG00000120738.8	-2.63875	1.20759e-98
ENSG00000242683.1	-1.11314	3.30631e-05
ENSG00000199545.1	-1.22937	6.09623e-12
ENSG00000170476.16	-2.34253	5.73636e-37
ENSG00000170458.14	-2.09732	2.07127e-112
ENSG00000202515.1	-2.23279	6.91216e-06
ENSG00000250120.8	-1.07563	6.51255e-09
ENSG00000251664.5	-2.27251	3.90065e-12
ENSG00000239389.8	-1.07696	0.00032842
ENSG00000248383.4	-2.38334	4.70426e-21
ENSG00000243232.6	-1.33627	4.51434e-10
ENSG00000120329.7	-1.28049	5.81283e-09
ENSG00000254122.2	-1.04968	9.02923e-18
ENSG00000250343.1	-1.05166	0.00547712
ENSG00000169302.16	-1.62114	1.77435e-16
ENSG00000280780.2	-1.86435	3.79607e-17
ENSG00000169252.5	-1.32054	1.57859e-37
ENSG00000173210.19	-1.32294	2.73148e-74
ENSG00000249669.10	-1.03003	3.99936e-13
ENSG00000276365.1	-1.05277	2.39069e-06
ENSG00000070808.16	-1.35265	8.18046e-10
ENSG00000260581.1	-1.31072	1.49803e-07
ENSG00000155511.18	-1.5893	3.43823e-07
ENSG00000170271.11	-1.58287	7.38217e-75
ENSG00000170624.13	-1.56409	2.60353e-22
ENSG00000145850.9	-3.60192	2.18907e-93
ENSG00000253653.1	-1.88389	4.01898e-19
ENSG00000055163.20	-1.80668	2.25496e-64
ENSG00000283413.1	-2.78065	5.1951e-38
ENSG00000170214.5	-2.46658	1.29755e-114
ENSG00000135083.15	-1.00015	1.09111e-12
ENSG00000145861.9	-1.48022	7.78514e-20
ENSG00000145934.16	-1.78068	1.83242e-25
ENSG00000253357.1	-1.0244	1.29943e-09
ENSG00000254192.1	-2.49899	8.35058e-36
ENSG00000254042.2	-3.51034	4.79808e-104
ENSG00000204767.4	-2.90362	4.28962e-34
ENSG00000182132.13	-1.60408	4.80491e-12
ENSG00000094755.17	-5.33155	8.62995e-114
ENSG00000287814.1	-1.82398	3.62711e-35
ENSG00000213386.3	-1.18385	5.17469e-09
ENSG00000120129.6	-1.69522	4.50357e-103
ENSG00000212402.1	-1.09896	7.43298e-06
ENSG00000253959.1	-3.1059	1.27087e-33
ENSG00000254211.6	-1.93437	4.31363e-43
ENSG00000120149.9	-1.06691	0.000396146
ENSG00000184845.4	-2.64663	3.32184e-59
ENSG00000286350.1	-1.74001	3.96484e-24
ENSG00000285476.1	-1.91984	1.16021e-18
ENSG00000251623.2	-1.82216	6.23341e-13
ENSG00000074276.10	-5.11974	3.33787e-151
ENSG00000160883.11	-2.21211	7.35548e-83
ENSG00000131183.11	-2.02755	6.54021e-53
ENSG00000131187.9	-1.69418	4.23061e-64
ENSG00000170074.19	-2.46657	5.57821e-38
ENSG00000250101.1	-4.09392	1.13929e-24
ENSG00000249684.6	-3.48283	5.92561e-99
ENSG00000204677.13	-1.85522	3.40671e-21
ENSG00000050767.17	-1.61762	6.10354e-27
ENSG00000271681.1	-3.74561	1.13417e-93
ENSG00000252464.1	-1.0096	6.54157e-14
ENSG00000113262.16	-3.93778	2.49977e-27
ENSG00000087116.16	-1.85993	4.02502e-45
ENSG00000278965.1	-3.01457	5.76712e-73
ENSG00000146090.16	-2.0424	6.62444e-08
ENSG00000131459.13	-2.19616	7.54173e-33
ENSG00000161055.4	-3.22868	1.47267e-46
ENSG00000137265.15	-1.70867	2.4365e-32
ENSG00000272279.1	-1.6044	1.3702e-19
ENSG00000170542.6	-1.04777	6.88714e-40
ENSG00000168994.13	-1.34086	6.33725e-87
ENSG00000233068.3	-1.97121	5.90176e-17
ENSG00000201185.1	-2.47706	2.72225e-06
ENSG00000219607.3	-2.68437	1.30864e-75
ENSG00000269985.1	-5.06406	1.49331e-123
ENSG00000225092.2	-1.20562	1.26896e-14
ENSG00000153162.9	-1.53907	2.53156e-37
ENSG00000111837.11	-1.7796	3.54925e-22
ENSG00000244476.3	-3.11384	2.12827e-40
ENSG00000215124.2	-3.16463	6.09196e-84
ENSG00000229896.2	-1.91415	2.94434e-51
ENSG00000137198.10	-1.24715	3.46849e-22
ENSG00000228412.9	-1.7018	6.1915e-13
ENSG00000172201.12	-2.06549	7.34004e-39
ENSG00000112293.15	-1.63362	2.29005e-41
ENSG00000272402.1	-1.12887	2.19207e-25
ENSG00000224164.2	-1.26573	9.03949e-08
ENSG00000111913.19	-1.28551	1.34503e-33
ENSG00000220517.2	-1.99579	3.39e-27
ENSG00000213972.3	-1.47836	9.7643e-09
ENSG00000124568.12	-1.51387	2.4198e-40
ENSG00000124564.17	-1.42459	4.03701e-41
ENSG00000112337.10	-1.65949	1.29451e-49
ENSG00000112812.16	-1.93519	9.31542e-19
ENSG00000204789.4	-1.41619	1.10962e-20
ENSG00000287252.1	-1.02601	7.35313e-10
ENSG00000189134.4	-2.00596	4.61899e-41
ENSG00000197935.6	-1.27266	2.85168e-20
ENSG00000204681.11	-1.79738	5.51265e-50
ENSG00000204618.8	-1.18949	7.42462e-09
ENSG00000196260.5	-2.98475	5.21814e-24
ENSG00000232810.4	-1.33265	8.90388e-19
ENSG00000204482.10	-1.24101	4.77981e-37
ENSG00000204475.10	-1.0193	3.01354e-17
ENSG00000204444.11	-1.33271	7.9087e-37
ENSG00000204420.10	-1.86307	3.41139e-13
ENSG00000204421.3	-1.00529	0.00372742
ENSG00000248290.1	-1.15813	2.66741e-11
ENSG00000231852.9	-1.16465	2.21647e-23
ENSG00000168477.19	-2.45793	4.87731e-72
ENSG00000204314.12	-1.39767	1.38206e-23
ENSG00000225914.3	-2.0611	2.19123e-33
ENSG00000204248.11	-1.3316	8.07257e-25
ENSG00000161896.12	-2.08099	2.381e-25
ENSG00000265123.2	-1.04406	0.000257471
ENSG00000187762.5	-1.0968	4.88209e-07
ENSG00000265527.1	-2.09801	1.10353e-37
ENSG00000124762.13	-1.00117	4.87576e-29
ENSG00000255587.9	-1.27642	3.9237e-08
ENSG00000146192.15	-1.16998	3.35716e-36
ENSG00000227920.3	-1.17423	9.60061e-07
ENSG00000279942.1	-1.52441	1.14913e-11
ENSG00000164626.9	-1.55677	9.03162e-37
ENSG00000124780.14	-3.6632	1.54365e-101
ENSG00000164627.18	-1.40295	3.39619e-21
ENSG00000146122.17	-1.02491	2.70847e-19
ENSG00000235033.7	-1.5161	2.43953e-37
ENSG00000112195.9	-1.37108	1.17423e-12
ENSG00000124731.13	-1.65255	2.44028e-22
ENSG00000261068.2	-1.2275	0.00274451
ENSG00000188112.9	-1.78299	6.91668e-22
ENSG00000288010.1	-3.06927	8.81708e-18
ENSG00000124713.6	-3.55551	3.09874e-137
ENSG00000137204.14	-2.18595	5.02603e-57
ENSG00000112796.10	-1.91135	5.53416e-24
ENSG00000172348.14	-1.06234	6.25065e-19
ENSG00000236466.2	-1.19668	2.46673e-05
ENSG00000146233.8	-4.04311	1.21209e-176
ENSG00000153291.16	-1.70602	1.47465e-59
ENSG00000180113.16	-2.09416	1.31859e-57
ENSG00000244694.7	-1.23675	6.88088e-15
ENSG00000146085.8	-1.13664	3.50301e-60
ENSG00000203972.10	-2.35672	3.04587e-32
ENSG00000197261.11	-2.3086	1.29509e-39
ENSG00000226733.4	-2.79996	3.31009e-53
ENSG00000170927.15	-3.31807	9.14814e-90
ENSG00000237674.1	-1.66537	1.99437e-33
ENSG00000244067.3	-3.39744	4.04595e-86
ENSG00000217228.1	-1.10993	1.69714e-10
ENSG00000243955.6	-1.67479	4.24324e-48
ENSG00000146147.15	-1.0289	1.0713e-16
ENSG00000287745.1	-1.44503	2.07464e-13
ENSG00000168143.9	-4.07103	1.86964e-28
ENSG00000146151.13	-4.40429	5.09256e-85
ENSG00000112175.8	-5.45225	2.99256e-133
ENSG00000272541.1	-1.89607	1.86992e-21
ENSG00000146166.17	-2.65801	2.34764e-72
ENSG00000218274.2	-2.64665	1.19158e-30
ENSG00000213312.3	-1.95991	1.52293e-44
ENSG00000285976.2	-1.10694	6.53045e-25
ENSG00000230910.4	-2.4183	6.06658e-38
ENSG00000135298.14	-3.65475	3.9503e-77
ENSG00000082293.13	-1.07754	3.84196e-07
ENSG00000232295.7	-1.38926	1.20058e-27
ENSG00000233237.8	-1.24899	9.38678e-48
ENSG00000279289.1	-1.429	5.60144e-19
ENSG00000185760.15	-1.02497	4.71662e-09
ENSG00000203907.9	-2.62123	3.89771e-20
ENSG00000080007.8	-1.50143	3.57841e-24
ENSG00000271945.2	-4.54696	3.35815e-69
ENSG00000269964.3	-3.3719	1.3535e-54
ENSG00000235357.2	-2.39696	1.21477e-38
ENSG00000285586.1	-1.19896	0.000504646
ENSG00000083123.15	-1.46503	6.83847e-109
ENSG00000272129.1	-1.64068	2.02795e-91
ENSG00000279022.1	-1.26042	4.39164e-24
ENSG00000233967.7	-1.77273	2.31738e-75
ENSG00000260645.2	-1.45672	8.63397e-42
ENSG00000112773.16	-1.26862	2.78419e-69
ENSG00000226089.2	-1.17066	3.22863e-07
ENSG00000232031.1	-1.22097	0.000165652
ENSG00000146242.8	-1.75406	8.2282e-37
ENSG00000214460.3	-1.17151	7.44154e-10
ENSG00000146278.11	-1.17165	4.3199e-63
ENSG00000112182.15	-1.57097	3.95134e-43
ENSG00000135333.14	-3.08404	1.68665e-21
ENSG00000232699.3	-1.4757	1.54525e-14
ENSG00000235142.10	-1.00459	2.32765e-33
ENSG00000112320.12	-1.05539	2.03278e-15
ENSG00000280135.1	-1.21655	6.69109e-16
ENSG00000146285.14	-1.40684	3.07804e-38
ENSG00000203799.13	-2.0013	2.16465e-42
ENSG00000010810.17	-1.05198	8.17236e-47
ENSG00000074935.14	-1.88702	1.31802e-152
ENSG00000203778.8	-1.27938	1.12011e-43
ENSG00000237234.7	-4.38869	5.82156e-77
ENSG00000232316.2	-1.71891	2.09295e-10
ENSG00000175967.4	-2.12614	2.87551e-22
ENSG00000123500.10	-1.37196	3.24597e-07
ENSG00000111817.18	-1.38928	8.20766e-69
ENSG00000188820.13	-1.42224	1.38879e-22
ENSG00000173626.10	-1.82127	1.78075e-37
ENSG00000218233.1	-1.37011	6.52017e-06
ENSG00000216316.1	-1.23995	3.17216e-13
ENSG00000186439.14	-1.213	9.47296e-06
ENSG00000111907.21	-1.27005	9.84608e-43
ENSG00000237742.7	-1.97134	1.44904e-49
ENSG00000135547.9	-1.08565	1.17766e-47
ENSG00000232131.1	-2.77923	3.36228e-41
ENSG00000146374.14	-5.67898	4.00374e-172
ENSG00000196569.12	-2.67279	1.75135e-56
ENSG00000227678.8	-1.15143	1.87137e-07
ENSG00000118520.15	-2.01721	6.27689e-58
ENSG00000154269.15	-1.21685	5.3439e-17
ENSG00000197594.13	-1.07753	1.98332e-68
ENSG00000079931.15	-1.143	7.01885e-11
ENSG00000112299.8	-2.68583	8.17571e-82
ENSG00000093134.15	-2.02007	2.23491e-66
ENSG00000112319.19	-1.34555	2.02503e-09
ENSG00000227954.7	-2.68818	2.48127e-45
ENSG00000118526.6	-2.75836	1.34748e-77
ENSG00000118515.11	-1.20249	7.803e-41
ENSG00000236700.6	-1.50443	2.69806e-22
ENSG00000232310.8	-2.31835	2.20165e-58
ENSG00000118514.14	-2.23906	3.73278e-139
ENSG00000236378.1	-3.02397	6.94122e-38
ENSG00000171408.14	-2.21885	8.81017e-107
ENSG00000260418.1	-1.25875	2.70787e-31
ENSG00000272189.1	-2.13395	9.6945e-47
ENSG00000286646.1	-1.06442	2.03005e-16
ENSG00000016402.13	-4.9481	3.09297e-74
ENSG00000225177.6	-1.22858	6.01188e-43
ENSG00000226571.2	-1.18985	6.9653e-15
ENSG00000218565.2	-1.43531	3.87413e-09
ENSG00000238099.3	-3.67217	2.26128e-83
ENSG00000205695.3	-1.57226	9.96984e-07
ENSG00000237494.1	-1.58975	2.36813e-25
ENSG00000112414.15	-1.14107	9.1019e-42
ENSG00000229017.7	-1.08305	5.84258e-29
ENSG00000227192.1	-1.38356	6.20745e-31
ENSG00000146416.19	-1.04438	5.96318e-77
ENSG00000217648.1	-1.19037	7.68061e-66
ENSG00000270655.1	-1.29037	0.00081308
ENSG00000135604.10	-1.18917	3.23406e-40
ENSG00000203727.4	-3.51748	1.94292e-119
ENSG00000215223.3	-1.20646	0.000194356
ENSG00000131019.11	-1.15555	3.65162e-20
ENSG00000009765.14	-2.3581	8.20181e-76
ENSG00000232891.1	-1.21894	1.26518e-09
ENSG00000224029.1	-1.46512	0.000119515
ENSG00000091831.23	-3.54741	1.3643e-176
ENSG00000131018.24	-1.46851	3.72181e-109
ENSG00000120279.6	-1.41134	1.23612e-49
ENSG00000146469.13	-1.14438	2.62616e-15
ENSG00000224893.7	-4.71877	2.62394e-84
ENSG00000074706.13	-1.1741	4.56741e-30
ENSG00000164674.15	-1.51493	7.32135e-39
ENSG00000203711.14	-3.61771	1.13182e-55
ENSG00000164691.17	-1.09152	1.03881e-20
ENSG00000213073.4	-1.18601	6.48523e-46
ENSG00000175003.15	-4.83587	3.56373e-169
ENSG00000213071.11	-2.59486	1.2535e-145
ENSG00000198670.11	-3.44406	3.43535e-163
ENSG00000122194.18	-1.78571	3.19632e-64
ENSG00000224371.6	-1.5263	3.02193e-10
ENSG00000112530.11	-1.41923	2.51106e-27
ENSG00000225683.6	-1.67086	6.32396e-05
ENSG00000176381.6	-1.9385	4.66315e-53
ENSG00000287189.1	-1.97553	3.71384e-33
ENSG00000060762.19	-1.64248	4.90911e-156
ENSG00000216966.1	-1.00976	0.000333264
ENSG00000112494.10	-1.70171	3.2202e-27
ENSG00000213065.2	-1.91021	1.39768e-17
ENSG00000146521.10	-1.05558	3.30452e-33
ENSG00000285212.1	-1.61868	1.15148e-28
ENSG00000125337.19	-1.86507	6.88507e-29
ENSG00000153303.17	-1.88134	7.09102e-20
ENSG00000234647.2	-1.46527	1.84693e-22
ENSG00000164488.12	-3.20795	2.38437e-59
ENSG00000285887.1	-1.05018	2.19469e-06
ENSG00000273100.1	-2.56112	1.08832e-61
ENSG00000227508.6	-1.15664	5.17527e-07
ENSG00000198719.9	-1.3846	7.45161e-39
ENSG00000282572.2	-1.02603	1.00823e-05
ENSG00000249852.1	-1.04787	4.24698e-05
ENSG00000229380.1	-4.70544	3.25545e-13
ENSG00000239857.7	-1.35122	2.62999e-53
ENSG00000273151.1	-2.79876	1.11295e-54
ENSG00000105963.15	-1.74231	3.74984e-39
ENSG00000164849.10	-1.37103	3.66407e-76
ENSG00000164850.15	-1.10404	3.06128e-27
ENSG00000164855.16	-1.03132	2.44587e-27
ENSG00000225968.7	-2.94878	5.63612e-88
ENSG00000002822.15	-1.18685	2.07551e-21
ENSG00000146555.19	-1.46276	1.97731e-15
ENSG00000283991.1	-2.44952	2.04889e-24
ENSG00000155026.16	-2.3568	3.13534e-40
ENSG00000236609.4	-1.15067	1.70788e-16
ENSG00000228010.6	-1.24711	1.43639e-22
ENSG00000169402.15	-2.03053	2.64459e-08
ENSG00000215018.10	-3.01537	2.38965e-57
ENSG00000272732.1	-1.28996	3.54373e-27
ENSG00000272894.5	-1.05009	6.0139e-28
ENSG00000122584.13	-1.03183	0.0115659
ENSG00000235431.2	-1.31621	3.19557e-10
ENSG00000230333.6	-4.4181	3.9202e-150
ENSG00000230435.1	-4.69787	6.53387e-137
ENSG00000146530.14	-2.76456	2.52433e-29
ENSG00000237070.1	-1.7401	9.04306e-11
ENSG00000286376.1	-1.75544	5.14746e-06
ENSG00000272537.1	-1.18749	6.38125e-07
ENSG00000106541.12	-1.33582	3.2682e-07
ENSG00000173467.9	-5.06329	1.86895e-40
ENSG00000048052.21	-1.19952	6.45636e-30
ENSG00000183742.13	-2.58837	3.16545e-51
ENSG00000233834.6	-1.70829	3.63052e-23
ENSG00000271133.5	-2.13853	1.06625e-19
ENSG00000105855.10	-3.89122	3.13565e-83
ENSG00000225308.2	-2.60521	6.15047e-09
ENSG00000136244.12	-2.52488	2.17991e-30
ENSG00000225792.2	-5.27449	3.24007e-198
ENSG00000280255.1	-1.76556	1.87837e-08
ENSG00000233429.9	-1.00637	1.72706e-16
ENSG00000197576.14	-1.00247	7.35431e-13
ENSG00000241644.2	-3.78972	1.04327e-120
ENSG00000254959.6	-1.99758	0.000108929
ENSG00000240583.12	-1.18262	1.71622e-19
ENSG00000173862.3	-2.5159	2.86881e-37
ENSG00000164619.10	-5.00704	2.91886e-189
ENSG00000164532.11	-2.73356	4.05244e-25
ENSG00000230539.1	-1.76917	2.47145e-11
ENSG00000227191.8	-1.62041	4.30772e-39
ENSG00000211689.7	-1.23109	3.5661e-26
ENSG00000231916.1	-1.50531	1.06746e-09
ENSG00000078053.17	-2.12975	4.41902e-32
ENSG00000164556.7	-1.55565	7.77088e-11
ENSG00000106536.20	-4.81223	4.2185e-89
ENSG00000224122.2	-3.71767	1.746e-81
ENSG00000164708.6	-1.34751	6.97352e-12
ENSG00000106624.11	-1.71096	2.33393e-24
ENSG00000106633.17	-2.89508	1.93461e-37
ENSG00000058404.20	-4.98435	1.45316e-180
ENSG00000015520.14	-2.61369	4.39647e-50
ENSG00000136274.9	-1.38403	6.46463e-14
ENSG00000122679.8	-2.07009	4.44326e-60
ENSG00000164742.16	-3.73195	1.66984e-121
ENSG00000146678.10	-2.36511	2.70332e-66
ENSG00000146674.15	-2.73737	1.45906e-164
ENSG00000237471.2	-1.38894	6.75532e-10
ENSG00000229628.1	-1.92402	1.81706e-16
ENSG00000236078.2	-1.93589	1.40257e-18
ENSG00000179869.15	-2.58682	5.79143e-46
ENSG00000224057.1	-1.40307	2.2557e-07
ENSG00000229886.1	-2.26251	1.14959e-75
ENSG00000126522.17	-1.71075	7.13908e-111
ENSG00000158321.18	-1.2149	8.26109e-37
ENSG00000185274.12	-2.85492	3.09338e-32
ENSG00000183166.11	-5.16761	3.21995e-82
ENSG00000174384.9	-1.51277	3.60271e-08
ENSG00000182487.12	-1.01194	2.10664e-17
ENSG00000188763.5	-1.10671	2.0487e-05
ENSG00000165215.6	-1.12218	2.32157e-21
ENSG00000189143.9	-1.75887	5.88871e-21
ENSG00000049540.17	-1.82959	1.02345e-27
ENSG00000232415.1	-2.39533	2.25824e-38
ENSG00000165178.9	-1.12026	2.21392e-23
ENSG00000276840.1	-1.07292	0.000934859
ENSG00000235090.1	-1.06884	1.11042e-22
ENSG00000230882.1	-2.09565	1.37937e-61
ENSG00000227038.3	-1.75153	1.00994e-50
ENSG00000224273.2	-2.99366	8.12189e-68
ENSG00000213549.3	-2.6428	3.22505e-38
ENSG00000243566.6	-1.7198	1.69656e-29
ENSG00000135205.15	-1.01129	2.86479e-24
ENSG00000127951.7	-1.09013	3.3983e-35
ENSG00000286855.1	-2.48839	1.51398e-27
ENSG00000234456.8	-2.51063	9.81956e-85
ENSG00000234223.2	-3.93285	3.99734e-53
ENSG00000232667.10	-2.56879	8.74497e-66
ENSG00000075223.14	-1.40982	1.47001e-15
ENSG00000019991.18	-3.47553	5.16942e-130
ENSG00000153956.16	-1.25617	4.50277e-21
ENSG00000186472.20	-2.9612	3.45004e-36
ENSG00000170381.14	-4.22811	1.31701e-47
ENSG00000005471.17	-1.27464	1.00578e-29
ENSG00000105784.15	-1.31831	4.04753e-36
ENSG00000127954.12	-2.78738	3.37041e-93
ENSG00000105792.19	-1.1364	1.37732e-53
ENSG00000280440.1	-1.25228	1.03449e-05
ENSG00000157240.4	-1.11406	7.1662e-37
ENSG00000105825.14	-2.8075	3.43079e-70
ENSG00000285090.1	-1.51899	1.58822e-08
ENSG00000158528.12	-2.06693	2.46602e-31
ENSG00000005421.9	-2.08605	2.08511e-71
ENSG00000237160.2	-1.45696	1.94783e-11
ENSG00000105852.11	-1.90857	1.76393e-89
ENSG00000273138.1	-1.67405	9.45924e-51
ENSG00000233942.1	-1.46279	2.66869e-31
ENSG00000005981.13	-1.07146	6.34838e-16
ENSG00000004799.8	-2.00214	1.92393e-73
ENSG00000106236.4	-1.34074	1.80675e-11
ENSG00000266019.1	-1.00563	2.73538e-14
ENSG00000106258.15	-1.41704	3.10867e-60
ENSG00000160870.14	-2.85385	2.17455e-82
ENSG00000160868.15	-6.51901	2.70524e-212
ENSG00000273407.1	-1.70165	1.87247e-05
ENSG00000021461.16	-3.34269	3.21709e-114
ENSG00000176402.6	-1.99664	1.54029e-62
ENSG00000160862.13	-2.19725	2.01182e-93
ENSG00000214313.8	-2.1252	1.45714e-71
ENSG00000286923.1	-1.58684	2.37679e-37
ENSG00000066923.17	-1.40129	3.45032e-32
ENSG00000184414.2	-1.28247	4.31727e-18
ENSG00000106333.13	-1.7254	5.42933e-46
ENSG00000106327.13	-1.30915	1.29236e-51
ENSG00000130427.3	-3.03209	4.62458e-49
ENSG00000087085.15	-1.08992	1.0259e-14
ENSG00000169894.18	-3.10121	2.72659e-89
ENSG00000274993.1	-1.57877	1.48344e-08
ENSG00000106366.9	-1.35927	4.33554e-24
ENSG00000214252.4	-1.89684	3.92353e-46
ENSG00000160963.14	-2.67533	2.98281e-57
ENSG00000170615.15	-1.62692	3.24298e-30
ENSG00000234715.2	-3.53246	1.08154e-13
ENSG00000189056.14	-2.87309	4.82539e-58
ENSG00000237513.2	-1.17698	3.65393e-11
ENSG00000105835.12	-1.15623	4.55865e-33
ENSG00000286076.1	-1.68968	6.10068e-16
ENSG00000253276.3	-1.21804	4.33843e-44
ENSG00000005249.13	-2.61977	1.93128e-103
ENSG00000173114.13	-3.83003	5.15235e-100
ENSG00000128573.26	-3.25601	1.67664e-64
ENSG00000105989.10	-4.36218	6.61825e-71
ENSG00000001626.16	-6.08708	1.12813e-125
ENSG00000077063.11	-2.1788	1.1783e-49
ENSG00000184408.10	-1.05162	3.50599e-06
ENSG00000106025.9	-1.12623	2.04118e-31
ENSG00000106034.18	-1.86848	1.9905e-78
ENSG00000106278.12	-1.1683	2.96932e-07
ENSG00000008311.15	-1.95043	6.28709e-65
ENSG00000179603.18	-3.64772	2.15974e-80
ENSG00000128594.8	-2.07995	1.92744e-74
ENSG00000259920.1	-1.33165	4.35585e-05
ENSG00000272701.3	-1.01056	1.11744e-06
ENSG00000286214.1	-1.52678	1.7282e-37
ENSG00000226380.9	-1.80955	4.93147e-51
ENSG00000271204.1	-1.63095	6.55907e-23
ENSG00000231721.7	-1.02409	7.30839e-30
ENSG00000199627.1	-2.37625	3.67549e-20
ENSG00000221866.9	-2.53066	1.56525e-36
ENSG00000229177.1	-1.31292	3.72347e-05
ENSG00000189320.9	-4.5341	1.02275e-121
ENSG00000181072.11	-6.24948	1.34078e-77
ENSG00000105894.12	-2.18205	3.77973e-48
ENSG00000122787.15	-3.25037	7.08956e-127
ENSG00000146966.13	-1.26336	2.4486e-37
ENSG00000257335.8	-1.11179	3.30103e-10
ENSG00000211713.3	-1.5104	1.98253e-10
ENSG00000286831.1	-1.25324	1.38963e-09
ENSG00000106123.12	-1.67968	1.14713e-37
ENSG00000165125.20	-6.09835	7.85167e-120
ENSG00000234066.1	-3.26787	8.19305e-18
ENSG00000185899.1	-2.56303	1.75178e-11
ENSG00000213215.5	-1.49593	2.34403e-05
ENSG00000174469.23	-1.10984	1.11584e-12
ENSG00000197558.13	-1.00371	1.05623e-14
ENSG00000002726.20	-1.83846	7.9947e-19
ENSG00000164867.11	-1.1939	1.55054e-34
ENSG00000187260.15	-2.06852	2.89146e-34
ENSG00000243836.5	-1.01821	5.66892e-11
ENSG00000106617.14	-1.21366	6.17916e-84
ENSG00000242048.3	-1.20018	6.03566e-12
ENSG00000239911.2	-1.04906	1.94537e-28
ENSG00000287865.1	-1.82683	7.82769e-28
ENSG00000186480.13	-1.27915	1.26338e-31
ENSG00000155093.19	-1.33089	2.41901e-42
ENSG00000225365.1	-2.98168	2.19982e-20
ENSG00000106018.14	-3.0969	4.30628e-44
ENSG00000272240.1	-1.96543	4.79349e-12
ENSG00000279852.1	-1.69503	3.68226e-11
ENSG00000180190.11	-1.8217	1.13335e-71
ENSG00000198010.12	-4.35275	2.63116e-110
ENSG00000282692.1	-4.92773	2.10902e-89
ENSG00000182372.10	-1.18327	2.6477e-109
ENSG00000282021.1	-2.13581	1.11116e-32
ENSG00000253982.2	-1.69904	2.37723e-164
ENSG00000104728.16	-1.73794	1.06179e-32
ENSG00000253764.3	-4.9734	4.32569e-122
ENSG00000253696.2	-4.19395	9.63654e-62
ENSG00000176595.4	-3.99533	9.50528e-173
ENSG00000036448.10	-3.59853	3.47401e-183
ENSG00000254319.6	-1.34329	5.88435e-05
ENSG00000164825.4	-1.72703	3.98696e-28
ENSG00000239839.7	-3.49977	6.5556e-25
ENSG00000253893.2	-1.16677	2.15575e-07
ENSG00000253981.5	-2.57169	2.5861e-41
ENSG00000173281.5	-1.53704	1.07917e-80
ENSG00000248538.8	-1.27052	1.46232e-45
ENSG00000249050.1	-1.95997	8.13739e-25
ENSG00000286622.1	-1.8429	1.01403e-11
ENSG00000175806.15	-1.7865	1.73241e-123
ENSG00000253641.6	-1.24025	2.23451e-29
ENSG00000253678.3	-3.57668	1.28464e-26
ENSG00000253649.5	-4.41294	4.65354e-88
ENSG00000272505.1	-1.37034	1.37993e-38
ENSG00000269918.1	-1.29092	5.06176e-27
ENSG00000255310.2	-1.15402	3.30552e-19
ENSG00000254936.4	-1.30163	9.51995e-08
ENSG00000280273.2	-1.01406	2.00858e-09
ENSG00000177710.5	-1.31848	4.08053e-09
ENSG00000154319.16	-2.11102	5.70966e-49
ENSG00000136573.14	-2.05435	8.00648e-36
ENSG00000255122.1	-2.17142	1.88548e-33
ENSG00000250305.9	-2.91585	2.69598e-98
ENSG00000251468.2	-2.61106	9.2507e-41
ENSG00000164741.15	-1.12478	1.37018e-87
ENSG00000185053.14	-3.30849	7.95799e-24
ENSG00000104723.21	-1.21718	3.92988e-20
ENSG00000078579.9	-1.20943	6.77589e-05
ENSG00000155970.12	-1.31044	7.27935e-61
ENSG00000003989.17	-2.14216	1.08249e-109
ENSG00000280453.1	-2.59348	7.13853e-46
ENSG00000279903.1	-2.35752	4.86468e-38
ENSG00000279932.1	-2.86344	4.73316e-61
ENSG00000104760.17	-1.64274	5.6197e-48
ENSG00000245281.8	-1.27004	1.8353e-52
ENSG00000286542.1	-1.28348	1.72332e-07
ENSG00000171428.14	-1.26775	8.81655e-96
ENSG00000244593.1	-1.28914	6.34922e-11
ENSG00000285624.2	-4.56239	2.48227e-105
ENSG00000156006.5	-4.30504	1.15493e-152
ENSG00000156011.17	-1.11748	7.03526e-48
ENSG00000278886.1	-2.15085	5.86904e-26
ENSG00000253557.6	-1.72412	1.30528e-34
ENSG00000222267.1	-1.22648	0.00765682
ENSG00000253199.2	-6.38083	2.79205e-26
ENSG00000168453.15	-1.39278	2.43782e-14
ENSG00000168490.14	-1.18055	3.17873e-17
ENSG00000104635.14	-1.28625	4.14933e-73
ENSG00000120913.23	-1.02046	3.23712e-59
ENSG00000261026.1	-2.04075	2.97654e-12
ENSG00000179388.9	-1.68827	2.86645e-32
ENSG00000134020.8	-1.81599	5.61082e-15
ENSG00000173535.14	-1.57475	9.40019e-45
ENSG00000173530.6	-1.18101	6.05509e-57
ENSG00000147454.14	-1.27666	3.00374e-71
ENSG00000167034.10	-1.2981	9.62221e-37
ENSG00000240694.9	-2.03493	1.67761e-42
ENSG00000120907.18	-4.02214	3.32752e-155
ENSG00000253813.1	-3.68664	1.57842e-96
ENSG00000253888.2	-1.47927	3.6649e-18
ENSG00000015592.16	-1.08601	0.000230631
ENSG00000120915.14	-1.98954	6.28493e-164
ENSG00000234770.1	-1.87997	7.59946e-34
ENSG00000120885.22	-1.09009	1.15152e-54
ENSG00000168079.17	-4.5496	1.96232e-98
ENSG00000189233.12	-1.43824	6.17654e-47
ENSG00000168081.9	-1.2504	2.618e-09
ENSG00000259196.1	-2.54152	5.29192e-16
ENSG00000272256.1	-1.36323	9.02901e-11
ENSG00000177669.4	-1.40331	2.85473e-12
ENSG00000157110.16	-1.05001	8.32818e-53
ENSG00000279041.1	-1.04726	4.64376e-26
ENSG00000133863.8	-2.33897	3.32356e-09
ENSG00000157168.20	-4.0193	7.44722e-109
ENSG00000239039.1	-2.61268	2.40893e-39
ENSG00000133874.2	-1.16405	1.75567e-49
ENSG00000183154.1	-2.85667	4.12184e-143
ENSG00000077782.20	-1.43546	4.27773e-36
ENSG00000272159.1	-1.95199	2.87872e-15
ENSG00000239218.2	-1.37366	6.14298e-09
ENSG00000253361.3	-2.20785	1.79048e-07
ENSG00000207258.1	-1.15617	1.14214e-07
ENSG00000188676.13	-5.28375	6.7387e-199
ENSG00000176907.5	-2.76829	9.34052e-152
ENSG00000104332.12	-5.10074	3.3755e-155
ENSG00000104371.5	-1.58762	1.65254e-11
ENSG00000176209.11	-1.00048	2.08003e-55
ENSG00000253330.1	-1.51219	1.43551e-19
ENSG00000221869.5	-1.53822	2.98867e-79
ENSG00000253688.2	-2.08118	1.70489e-25
ENSG00000034239.11	-2.65023	7.67792e-59
ENSG00000147481.17	-1.21248	3.684e-11
ENSG00000253475.1	-1.10102	2.69558e-06
ENSG00000147488.11	-1.5336	1.58963e-13
ENSG00000196711.9	-5.32604	2.46206e-60
ENSG00000183729.3	-4.52003	1.09403e-70
ENSG00000286471.1	-2.25547	2.59518e-10
ENSG00000253821.2	-3.07834	4.899e-46
ENSG00000167912.6	-1.44293	2.56395e-15
ENSG00000240915.2	-1.22916	2.52067e-17
ENSG00000137561.5	-1.10314	8.82528e-24
ENSG00000254102.2	-1.29268	3.87356e-08
ENSG00000180828.3	-2.78271	1.11894e-57
ENSG00000285791.1	-1.33345	2.79105e-34
ENSG00000147576.17	-1.53773	9.19042e-58
[truncated: 2,838 more rows]
